# Supplementary material
Source: Elsevier journal article supplement (https://www.sciencedirect.com/science/article/pii/S217357432030040X)
Supplement: mmc1 [file S217357432030040X:mmc1.pdf]

# **ENFERMEDADES AUTOINMUNES** **SISTÉMICAS**

## **GUÍA PARA DERIVACIÓN EN ATENCIÓN PRIMARIA**

**SOCIEDAD ESPAÑOLA DE REUMATOLOGÍA  
SER**

**SOCIEDAD ESPAÑOLA DE MEDICINA  
FAMILIAR Y COMUNITARIA  
SEMFYC**

**Abril 2018**

## **ANEXO 1. ALGORITMOS DE ENFERMEDADES AUTOINMUNES SISTÉMICAS**

### **GUÍA PARA DERIVACIÓN EN ATENCIÓN PRIMARIA**

#### **SER-SEMFYC**

#### **AUTORES**

Urruticoechea Arana A (1), León Vázquez F (2), Giner Ruiz V (3), Andréu Sánchez JL (4), Olivé Marqués A (5), Freire González M (6), Pego Reigosa JM (7), Muñoz Fernández S (8), Román Ivorra JA (9), Alegre Sancho JJ (10), Vargas Negrín F (11), Medina Abellán M (12), Cobo-Ibáñez T (13), Mas Garriga X (14), Calvo Alén J (15), Costa Ribas C (16), Blanco Vela R (17), Pérez Martín A (18), Beltrán Catalán E (19), Forcada Gisbert J (20), Hernández Miguel MV (21), Hermosa Hernán JC (22), Narváez García J (23), Nieto Pol E (24) y Rúa-Figueroa I (25).

Sociedad Española de Reumatología (SER)

Sociedad Española de Medicina Familiar y Comunitaria (SEMFYC)

1. Hospital Can Misses. Ibiza. SER.
2. Centro de Salud San Juan de la Cruz. Pozuelo de Alarcón (Madrid). Universidad Francisco de Vitoria. SEMFYC.
3. Centro de Salud Ciudad Jardín. Alicante. SEMFYC.
4. Hospital Universitario Puerta del Hierro Majadahonda. Majadahonda (Madrid). SER.
5. Hospital Universitari Germans Trias i Pujol. Badalona (Barcelona). SER.
6. Hospital Universitario de A Coruña. SER.
7. Hospital Meixoeiro de Vigo. Instituto de Investigación Sanitaria Galicia Sur. SER.
8. Hospital Universitario Infanta Sofía, Universidad Europea de Madrid. San Sebastián de los Reyes (Madrid). SER.
9. Hospital Universitario y Politécnico La Fe. Valencia. SER.
10. Hospital Universitari Doctor Peset. Valencia. SER.
11. Centro de Salud Doctor Guigou. Tenerife. SEMFYC.
12. Centro de Salud Espinardo. Murcia. SEMFYC.
13. Hospital Universitario Infanta Sofía, Universidad Europea de Madrid. San Sebastián de los Reyes (Madrid). SER.
14. EAP Santa Eulàlia Sud. L'Hospitalet de Llobregat (Barcelona). SEMFYC

## **ANEXO 1. ALGORITMOS DE ENFERMEDADES AUTOINMUNES SISTÉMICAS**

### **GUÍA PARA DERIVACIÓN EN ATENCIÓN PRIMARIA**

#### **SER-SEMFYC**

14. EAP Santa Eulàlia Sud. L'Hospitalet de Llobregat (Barcelona). SEMFYC
15. Hospital Universitario Araba. Vitoria-Gasteiz. SER.
16. Centro de Salud Vila. Ibiza. SEMFYC.
17. Hospital Universitario Marqués de Valdecilla. Santander. SER.
18. Centro de Salud Centro. Santander. SEMFYC.
19. Hospital del Mar. Barcelona. SER.
20. ABS 4 Badalona (Barcelona). SEMFYC.
21. Hospital Clínico y Provincial. Barcelona. SER.
22. Centro de Salud Ciudades. Getafe (Madrid). SEMFYC.
23. Hospital Universitari de Bellvitge – IDIBELL. Universitat de Barcelona. SER
24. Centro de Salud Concepción Arenal. Santiago de Compostela. SEMFYC.
25. Hospital Universitario Doctor Negrín. Las Palmas de Gran Canaria. SER.

**ÍNDICE**

Presentación ..... 7  
José Luis Andreu Sánchez

Prólogo ..... 8  
Salvador Tranche Iparraguirre

Introducción ..... 9

**ALGORITMOS CUTÁNEOS**

Capítulo 1. Exantema ..... 10  
Emma Beltrán Catalán, Jordi Forcada Gisbert

Capítulo 2. Fotosensibilidad ..... 13  
Jordi Forcada Gisbert, Emma Beltrán Catalán

Capítulo 3. Púrpura ..... 16  
Jaime Calvo Alen, Fernando León Vázquez

Capítulo 4. Eritema nodoso ..... 19  
Fernando León Vázquez, Jaime Calvo Alen

Capítulo 5. *Livedo reticularis* ..... 22  
Jaime Calvo Alen, Fernando León Vázquez

**ALGORITMOS MUCOSOS**

Capítulo 6. Aftas orales y genitales ..... 25  
Vicente Giner Ruiz, Juan José Alegre Sancho

Capítulo 7. Sinusitis crónica ..... 29  
Juan José Alegre Sancho, Vicente Giner Ruiz

Capítulo 8. Xerostomía ..... 32  
Juan José Alegre Sancho, Vicente Giner Ruiz

Capítulo 9. Parótidomegalia ..... 35  
Vicente Giner Ruiz, Juan José Alegre Sancho

**ALGORITMOS VASCULARES**

Capítulo 10. Fenómeno de Raynaud ..... 38  
José Andrés Román Ivorra, María D. Medina Abellán

Capítulo 11. Trombosis venosa recurrente ..... 41  
María D. Medina Abellán, José Andrés Román Ivorra

Capítulo 12. Isquemia arterial ..... 44  
María D. Medina Abellán, José Andrés Román Ivorra

**ALGORITMOS OCULARES**

Capítulo 13. Uveítis ..... 47  
Ricardo Blanco Vela, Álvaro Pérez Martín

Capítulo 14. Ojo seco ..... 50  
Álvaro Pérez Martín, Ricardo Blanco Vela

Capítulo 15. Epiescleritis ..... 54  
Fernando León Vázquez, Ana Urruticoechea-Arana

**ALGORITMOS NEUROLÓGICOS**

Capítulo 16. Cefalea/arteritis de la temporal ..... 57  
Juan Carlos Hermosa Hernán, Santiago Muñoz Fernández

**ALGORITMOS GINECO-OBSTÉTRICOS**

Capítulo 17. Abortos recurrentes ..... 60  
Enrique Nieto Pol, José María Pego Reigosa

**ALGORITMOS MUSCULOESQUELÉTICOS**

Capítulo 18. Artritis agudas ..... 64  
Carmen Costa Ribas, Ana Urruticoechea-Arana

Capítulo 19. Artritis crónicas ..... 68  
Ana Urruticoechea-Arana, Carmen Costa Ribas

Capítulo 20. Artromialgias y dolor crónico. .... 74  
Javier Narváez García, Xavier Mas Garriga

**ALGORITMOS SOBRE SÍNTOMAS GENERALES**

Capítulo 21. Síndrome constitucional ..... 77  
M<sup>a</sup> Victoria Hernández Miguel, Xavier Mas Garriga

Capítulo 22. Fiebre ..... 81  
Xavier Mas Garriga, M<sup>a</sup> Victoria Hernández Miguel

**ALGORITMOS SOBRE ALTERACIONES ANALÍTICAS**

Capítulo 23. Velocidad de sedimentación globular (VSG) y  
proteína C reactiva (PCR) elevadas ..... 85  
Tatiana Cobo Ibáñez, Francisco Vargas Negrín

Capítulo 24. Anticuerpos antinucleares (ANA) ..... 88  
Íñigo Rúa-Figueroa Fernández de Larrinoa, Francisco Vargas Negrín

Capítulo 25. Creatinfosfokinasa (CPK) elevada ..... 91  
Tatiana Cobo Ibáñez, Francisco Vargas Negrín

Capítulo 26. Factor reumatoide (FR) ..... 95  
Francisco Vargas Negrín, Tatiana Cobo Ibáñez

**GLOSARIO DE ABREVIATURAS** ..... 98

## **PRESENTACIÓN**

Dr. José Luis Andreu.

Presidente de la Sociedad Española de Reumatología (SER)

Desde la Sociedad Española de Reumatología saludamos con ilusión y entusiasmo la aparición de estos algoritmos multiformato que va a potenciar la comunicación y colaboración entre los médicos de Atención Primaria y los reumatólogos.

Las enfermedades autoinmunes sistémicas son un grupo heterogéneo de procesos, con manifestaciones clínicas iniciales muy diversas. Su diagnóstico y tratamiento precoces son fundamentales para controlar la actividad inflamatoria de la enfermedad, preservar la función de los diferentes órganos y evitar complicaciones graves cuando no letales.

Estos algoritmos son una herramienta de extraordinaria utilidad para que el médico de Atención Primaria detecte y oriente el cuidado asistencial que estos pacientes requieren. Me gustaría reconocer la excelente labor de los autores y el liderazgo de los directores, la Dra. Urruticoechea y el Dr. León. Sin su entusiasmo, dedicación y conocimiento esta obra no podría haber visto la luz. Espero que, con ella, los pacientes con enfermedades autoinmunes sistémicas sean diagnosticados y tratados precozmente, asegurando su calidad de vida y su manejo óptimo.

Madrid, abril de 2018

## PRÓLOGO

Dr. Salvador Tranche Iparraguirre.

Presidente de la Sociedad Española de Medicina Familiar y Comunitaria (SEMFC)

Los médicos de familia nos enfrentamos a diario a síntomas y signos exploratorios de naturaleza inespecífica, ante los cuales se despliega una amplia variedad de opciones diagnósticas, lo que nos obligan a estar continuamente actualizados. Por eso, agradecemos disponer de guías diagnósticas que combinen la simplicidad y el rigor, para poder orientar de manera correcta y rápida a nuestros pacientes. A través de estas herramientas se consigue la protocolización de procesos diagnósticos complejos, y se posibilita la utilización racional de las pruebas complementarias analíticas y de imagen. De este modo, ya no hay excusa para ampliar el catálogo de pruebas accesibles al médico de atención primaria solicitadas conforme a esta secuencia diagnóstica, puesto que así se gana en comodidad para el paciente, rapidez diagnóstica y se mejora la eficiencia de todo el sistema sanitario.

La presente Guía de Derivación de Enfermedades Autoinmunes Sistémicas presenta estas características, además de haber adoptado un formato de algoritmos, lo que facilita su utilización y permite su adaptación futura a aplicaciones informáticas de apoyo al diagnóstico.

El procedimiento utilizado para su elaboración, emparejando a médicos especialistas en reumatología de la Sociedad Española de Reumatología con especialistas en medicina familiar y comunitaria de la Sociedad Española de Medicina Familiar y Comunitaria es una garantía de calidad de la obra que tiene en sus manos. Esperamos poder continuar en este camino de colaboración en otros ámbitos de la atención, teniendo como objetivos comunes la mejora en la coordinación y continuidad asistencial, la eficiencia y, en definitiva, dar una atención de máxima calidad a nuestros pacientes.

Solo me resta felicitar a los médicos de familia de semFC que han participado en este proyecto no sólo por el rigor científico y la utilidad clínica de ésta obra, sino también por el esfuerzo y la generosidad que han dedicado en representación de semFC.

Gracias en mi nombre y en el de la Sociedad Española de Medicina Familiar y Comunitaria.



## INTRODUCCIÓN

El manejo de las enfermedades autoinmunes sistémicas (EAS) es un reto para cualquier médico en su práctica clínica. Aunque estas patologías se consideran infrecuentes, en conjunto no son excepcionales, afectando a cientos de miles de pacientes en España. Desde el momento en que el paciente aparece por el centro de salud, el médico de familia se enfrenta a una serie de síntomas y signos inespecíficos, ante los que deberá sospechar esta patología al inicio de la enfermedad y plantear la posibilidad de derivarlo. Si finalmente se confirma la sospecha, habrá de compartir con el especialista hospitalario su seguimiento posterior.

El objetivo principal del proyecto es desarrollar una guía de diagnóstico inicial y derivación que ayudará al médico de atención primaria en la toma de decisiones ante la sospecha clínica de una EAS, facilitando su reconocimiento y su derivación al reumatólogo en su caso. Los objetivos secundarios son sensibilizar a los médicos de familia de la existencia de estas patologías menos frecuentes, mejorar la calidad de las derivaciones, disminuir los tiempos de espera y coordinar los dos niveles asistenciales en relación con estas patologías.

Con esta finalidad se ha creado la presente guía de derivación de EAS para médicos de atención primaria, mediante la colaboración entre reumatólogos y médicos de familia vinculados a las sociedades científicas SER (Sociedad Española de Reumatología) y SEMFYC (Sociedad Española de Medicina Familiar y Comunitaria). Hemos optado por un formato de algoritmos sencillos, que se complementa con una aplicación informática que facilitará el reconocimiento y la derivación de estas enfermedades de diagnóstico y abordaje complejos.

Se eligió un grupo de expertos de las dos sociedades científicas y se diseñó un índice de síntomas y signos-guía. Cada algoritmo se encargó a una pareja formada por un especialista de Reumatología y otro de Medicina Familiar y Comunitaria, pertenecientes a la SER y SEMFYC respectivamente. Se desarrolló, de forma consensuada, un algoritmo de toma de decisiones conducente a una lista de posibles diagnósticos y una propuesta de derivación, que posteriormente se revisó y homogeneizó. Los algoritmos se adaptaron a través de una utilidad informática para facilitar la implementación de la guía y su posterior difusión. Se han seleccionado los 26 algoritmos más relevantes, y se presentan homogeneizados con síntomas y síndromes, ordenados por órganos y aparatos como se describe en el índice.

Como cualquier obra de estas características, puede haberse deslizado algún error; contamos con las aportaciones de los lectores para mejorarlo, confiando que en futuras ediciones se vayan mejorando los algoritmos. En cualquier caso, esperamos que resulten útiles al médico asistencial en su práctica diaria.

Los coordinadores y editores.

# ENFERMEDADES AUTOINMUNES SISTÉMICAS GUÍA PARA DERIVACIÓN EN ATENCIÓN PRIMARIA SER-SEMFYC

## EXANTEMA

Dra. Emma Beltrán Catalán  
Sociedad Española de Reumatología (SER)  
Especialista en Reumatología  
Servicio de Reumatología Hospital del Mar. Barcelona

Dr. Jordi Forcada Gisbert  
Sociedad Española de Medicina Familiar y Comunitaria (SEMFYC)  
Especialista en Medicina Familiar y Comunitaria  
ABS 4 Badalona (Barcelona)

## Erupción eritematosa generalizada<sup>1,2</sup> con artralgias, artritis o fiebre

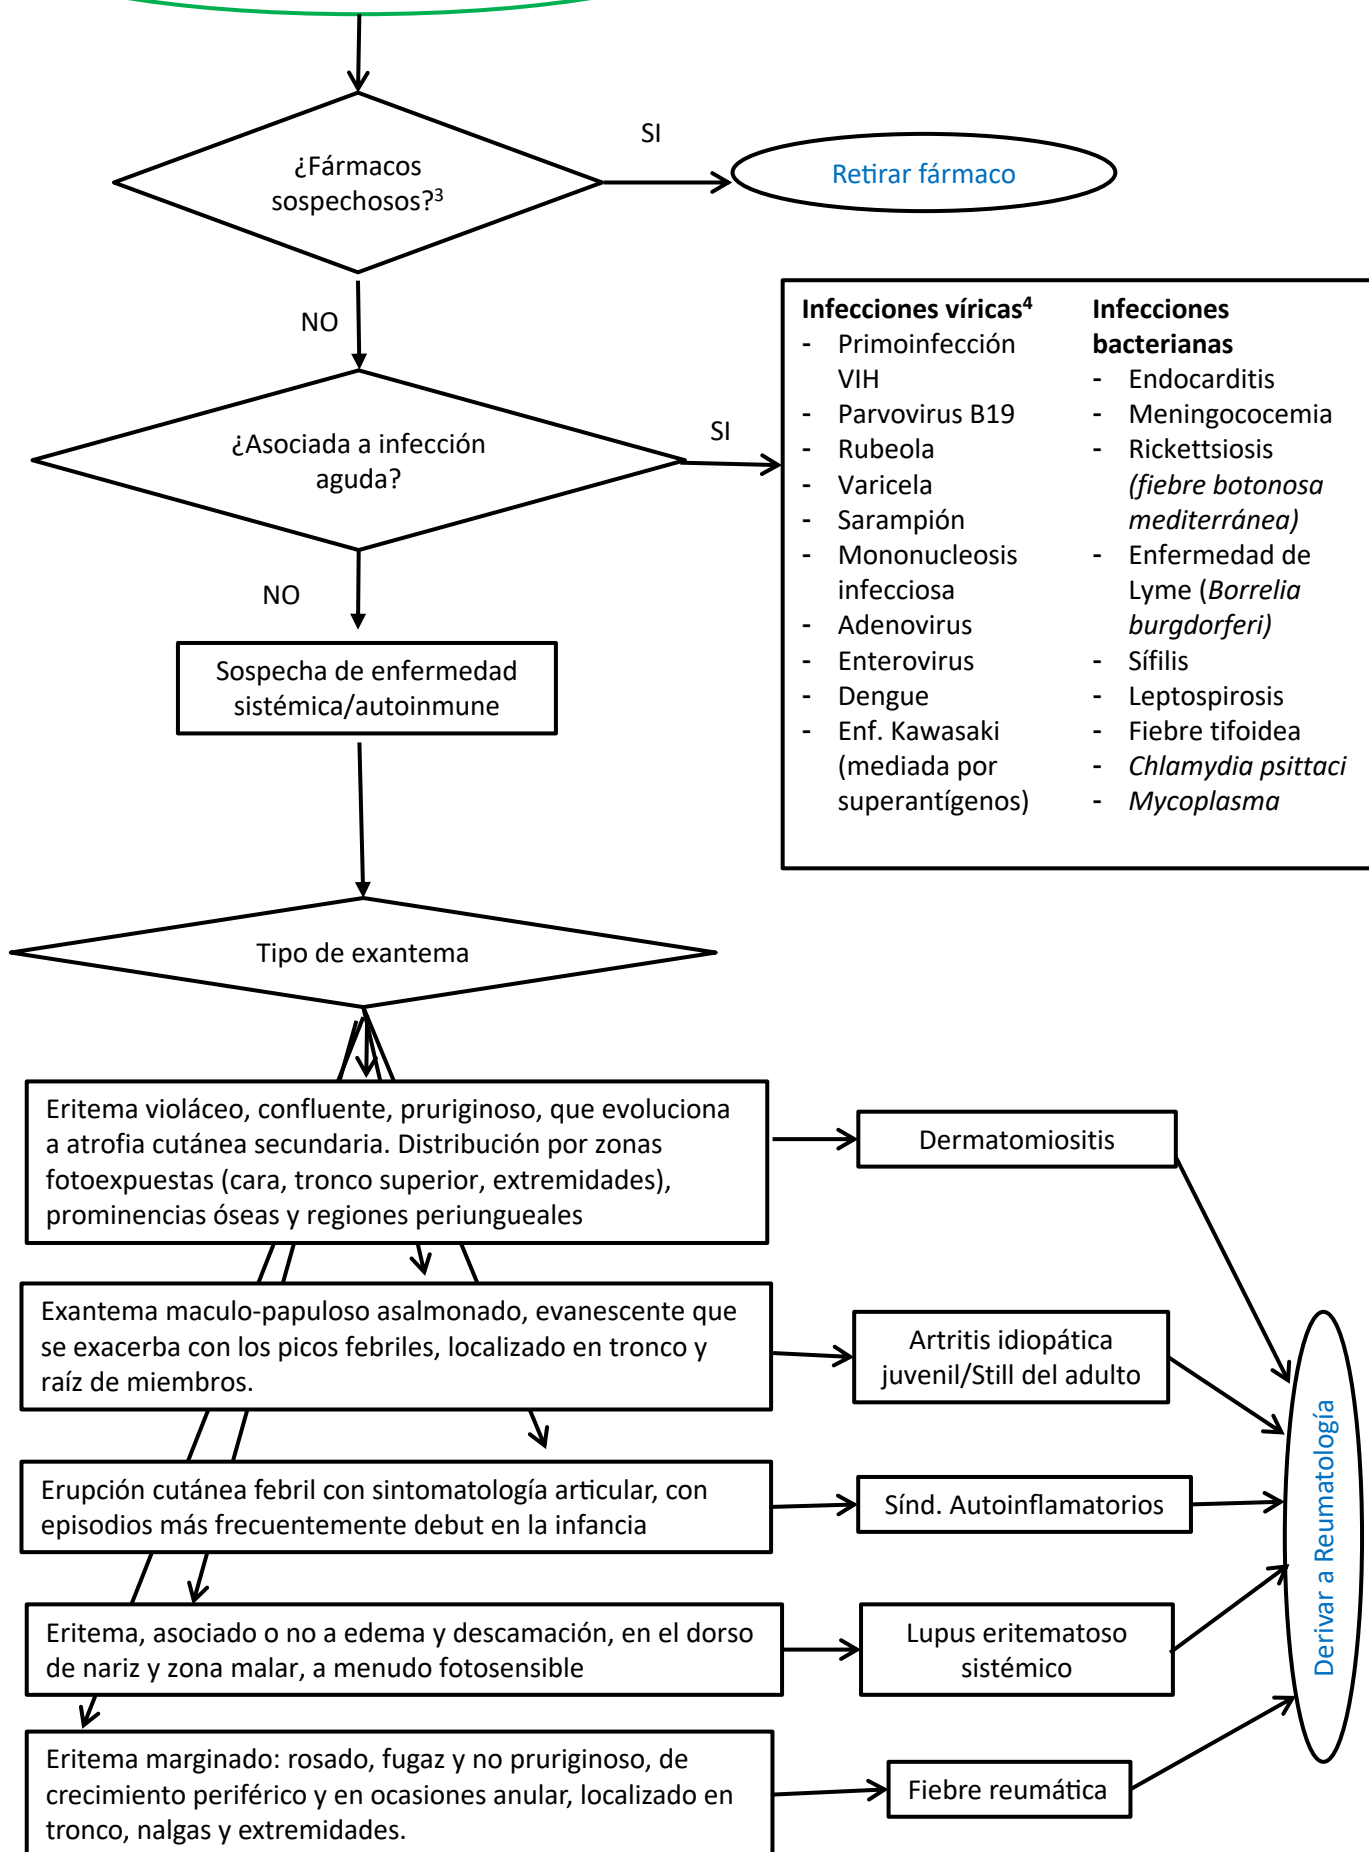

## NOTAS

1. Exantema definición: erupción cutánea abrupta de morfología, coloración, distribución y extensión variables atribuible a una causa infecciosa, medicamentosa o sistémica.
2. Las manifestaciones cutáneo-mucosas son un hallazgo frecuente en muchas enfermedades reumáticas. Pueden desarrollarse a lo largo de la evolución del proceso reumatológico, o incluso ser la primera manifestación de la enfermedad. El reconocimiento de esta semiología cutáneo-mucosa puede ser importante no solo para el diagnóstico, sino también para el pronóstico y tratamiento de muchos de estos procesos. El exantema es una manifestación cutánea no específica de enfermedad reumática, de valor diagnóstico variable y, con frecuencia, compartido por distintas entidades.
3. Las reacciones a fármacos pueden dar lugar a exantemas generalizados y ocasionalmente a artralgias o inflamación articular franca. Son típicos con antibióticos, antiinflamatorios o metamizol.
4. La mayoría de las enfermedades víricas de la infancia cursan con exantemas típicos y en ocasiones con artritis, bien en el proceso agudo o con posterioridad.

## BIBLIOGRAFÍA

Viral exanthems: An update on laboratory testing of the adult patient. Korman AM, Alikhan A, Kaffenberger BH. J Am Acad Dermatol. 2017 Mar;76(3):538-550. doi: 10.1016/j.jaad.2016.08.034.

Severe cutaneous adverse drug reactions. Chung WH, Wang CW, Dao RL. J Dermatol. 2016 Jul;43(7):758-66. doi: 10.1111/1346-8138.13430.

# ENFERMEDADES AUTOINMUNES SISTÉMICAS GUÍA PARA DERIVACIÓN EN ATENCIÓN PRIMARIA SER-SEMFYC

## FOTOSENSIBILIDAD

Dr. Jordi Forcada Gisbert

Sociedad Española de Medicina Familiar y Comunitaria (SEMFYC)

Especialista en Medicina Familiar y Comunitaria

ABS 4 Badalona (Barcelona)

Dra. Emma Beltrán Catalán

Sociedad Española de Reumatología (SER)

Especialista en Reumatología

Servicio de Reumatología Hospital del Mar. Barcelona

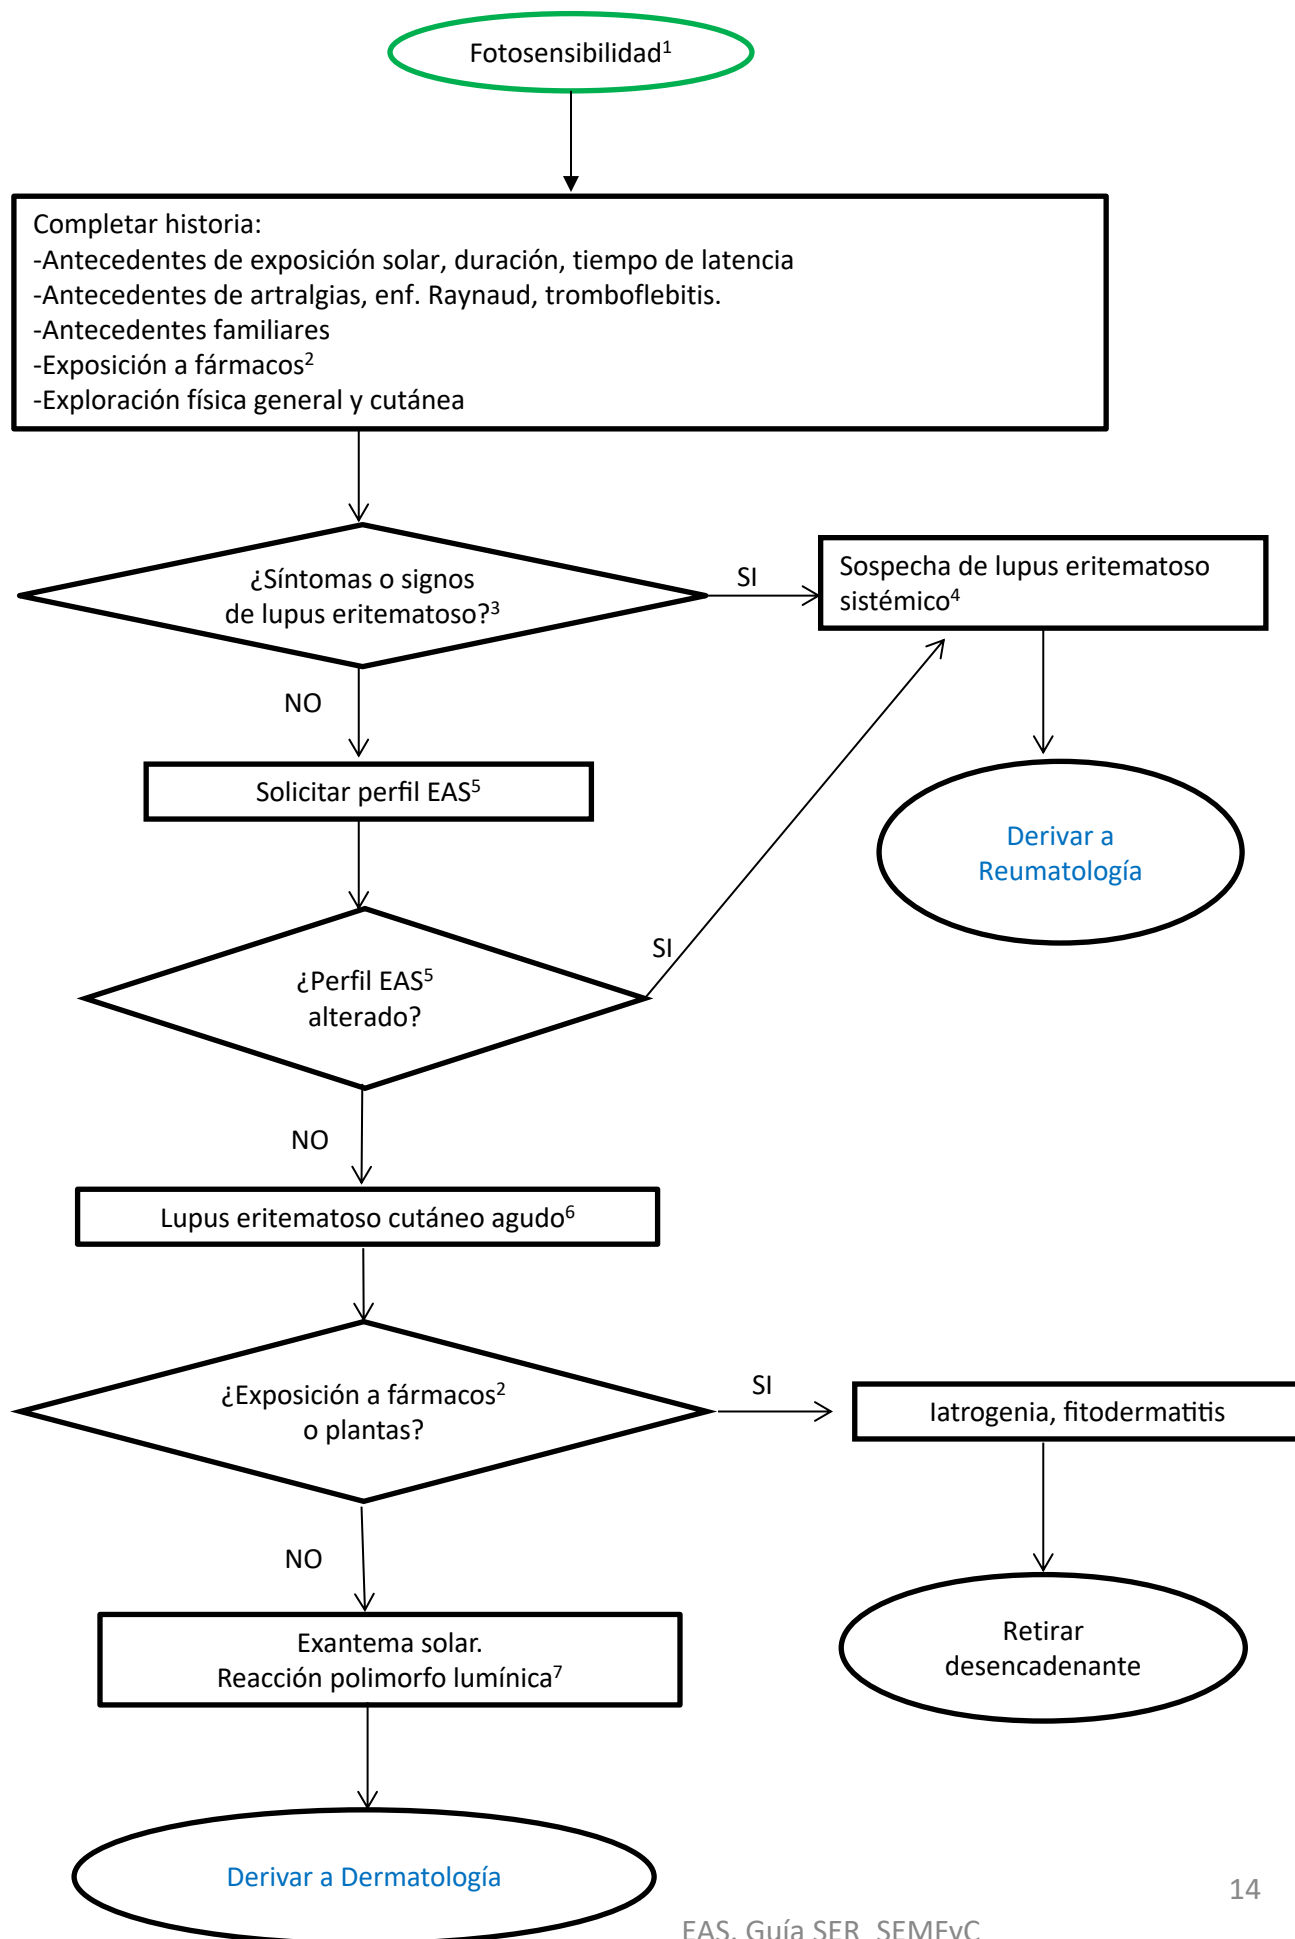

## NOTAS

1. La fotosensibilidad es la respuesta anómala a la luz del sol que se presenta horas, semanas o meses después de la exposición
2. Fármacos relacionados: antibióticos (tetraciclinas, ácido nalidíxico, sulfamidas, fluorquinolonas), antifúngicos (griseofluvína, ketoconazol), antiinflamatorios no esteroideos (ibuprofeno, diclofenaco, naproxeno, piroxicam, nabumetona, celecoxib), antipsicóticos (clorpromacina), antidepresivos (amitriptilina), benzodiacepinas (alprazolam, clordiazepóxido), antiarrítmicos (amiodarona), diuréticos (furosemida, hidroclorotiazida), sulfonilureas, retinoides (isotretinoina, etretinato), quimioterápicos (dacarbazina, 5-fluorouracilo, vinblastina, metotrexato), vitamina B6, ranitidina, captopril.
3. Signos o síntomas de lupus eritematoso sistémico (LES): artritis/artralgia, serositis, nefropatía, enfermedad neurológica, hematológica, fenómeno de Raynaud, tromboflebitis, rash malar, aftas bucales, abortos recurrentes
4. Enfermedad autoinmune sistémica, basada en una hiperactividad de los linfocitos. La exposición solar exacerba el LES.
5. Perfil EAS: análisis inicial habitualmente disponible en Atención Primaria para enfermedades autoinmunes, que incluye hemograma, bioquímica básica, velocidad de sedimentación, proteína C reactiva, anticuerpos antinucleares (ANA) y orina elemental.
6. El lupus eritematoso cutáneo agudo se presenta como eritema malar en alas de mariposa, eritema generalizado, placa eritematosa y alopecia.
7. Grupo de erupciones cutáneas recidivantes, idiopáticas y adquiridas que se caracterizan por una reacción tardía anormal a la luz solar.

## BIBLIOGRAFÍA

Wolf K, Johnson LA. Fotosensibilidad, trastornos relacionados con el sol y las radiaciones ionizantes. En: Wolf K, Johnson LA (Eds). Fitzpatrick: Atlas en color y sinopsis de dermatología. Ed Panamericana: Madrid, 2010.

Wolf K, Johnson LA. La piel en enfermedades inmunitarias, autoinmunitarias y reumáticas. En: Wolf K, Johnson LA (Eds). Fitzpatrick: Atlas en color y sinopsis de dermatología. Ed Panamericana: Madrid, 2010.

Gerencia Regional de Salud de Castilla y León. Medicamentos y fotosensibilidad. SACYLIPE 6, 2016. <https://www.saludcastillayleon.es/sanidad/cm/portalmedicamento/facm/1294129/747856-Sacylipe%206%20-%20202016.%20Medicamentos%20y%20fotosensibilidad.pdf>.

# ENFERMEDADES AUTOINMUNES SISTÉMICAS

## GUÍA PARA DERIVACIÓN EN ATENCIÓN PRIMARIA

### SER-SEMFYC

# PÚRPURA

Dr. Jaime Calvo Alen

Sociedad Española de Reumatología (SER)

Especialista en Reumatología

Hospital Universitario Araba. Vitoria-Gasteiz

Dr. Fernando León Vázquez

Sociedad Española de Medicina Familiar y Comunitaria (SEMFYC)

Especialista en Medicina Familiar y Comunitaria

Centro de Salud San Juan de la Cruz. Pozuelo de Alarcón (Madrid)



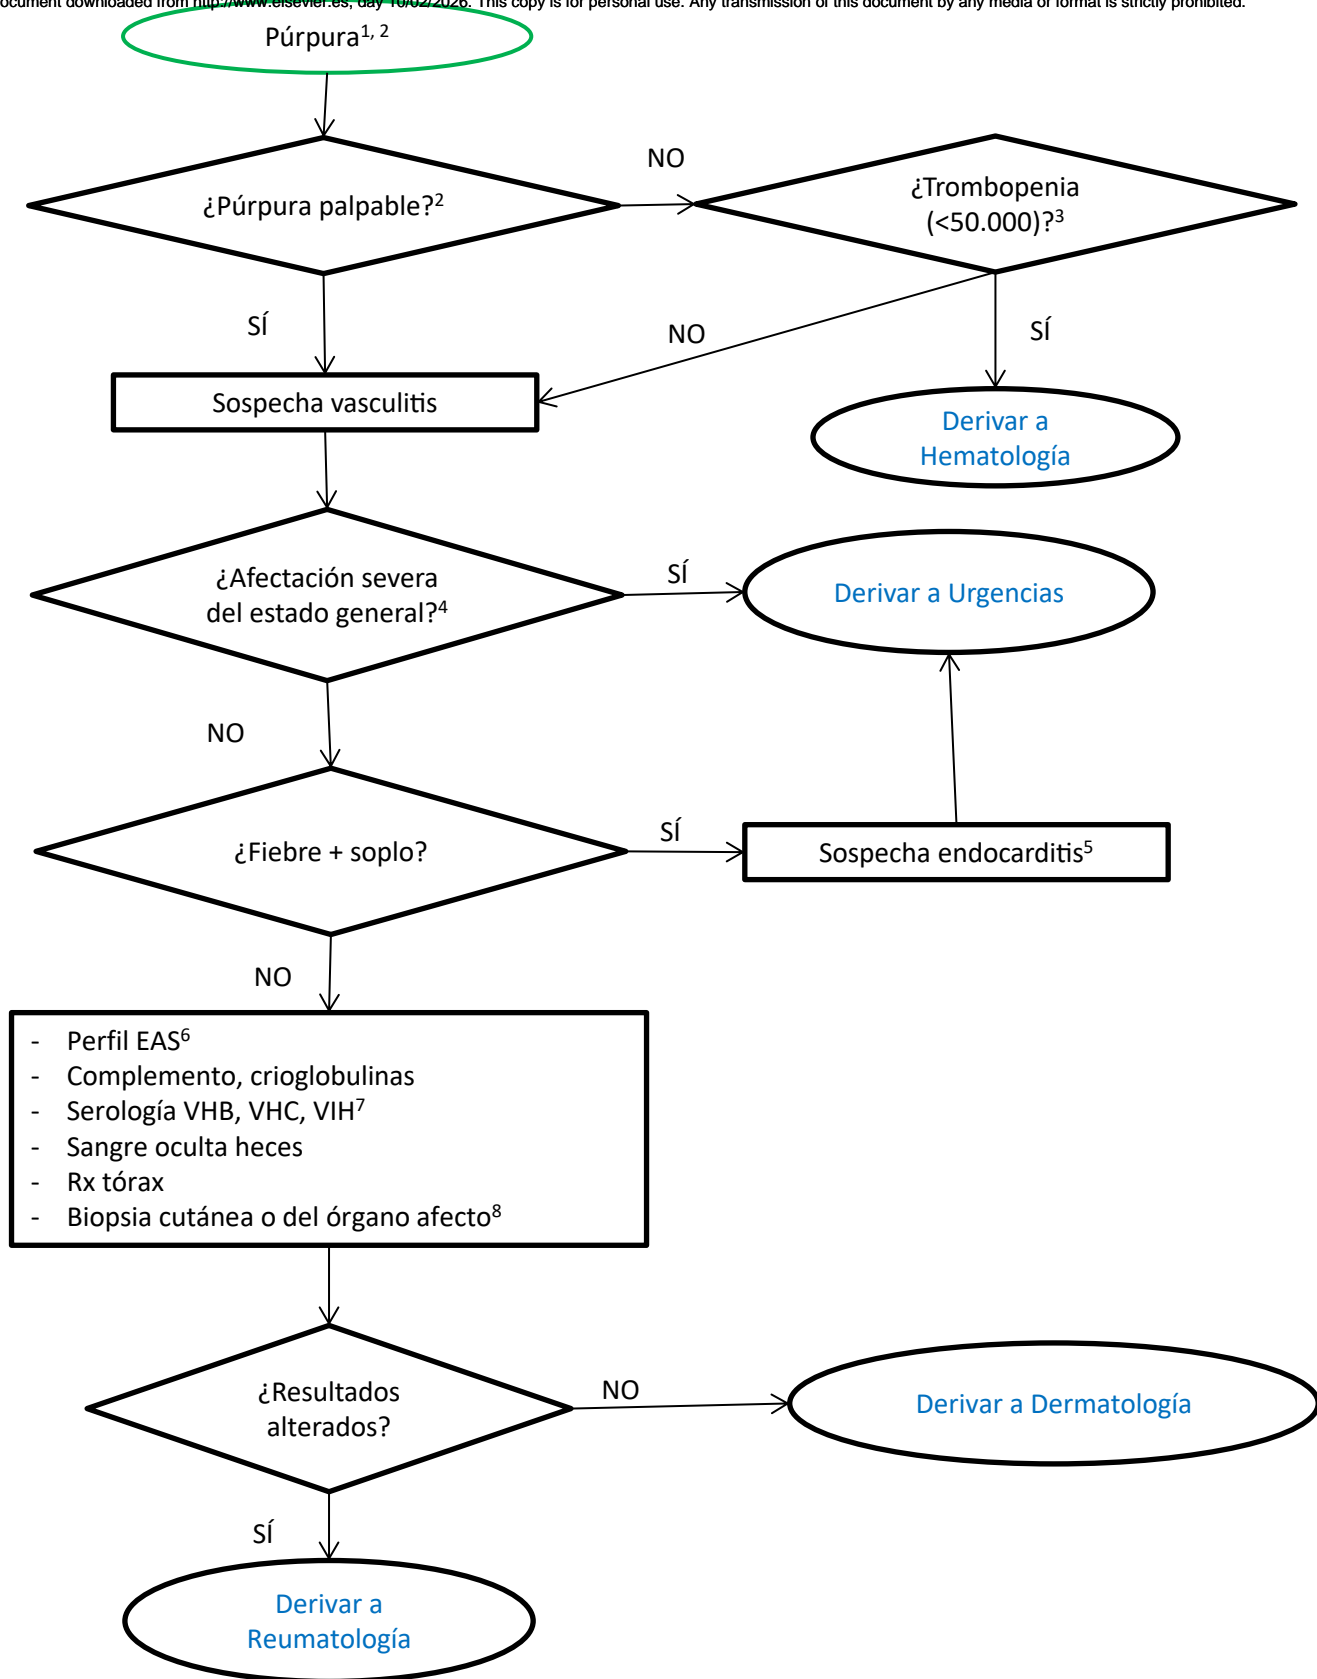

## NOTAS

1. El algoritmo se centra en adultos, en el caso de la púrpura infantil considerar trombocitopatías congénitas.
2. La púrpura se define como una erupción maculo-papular de lesiones rojo-vinosas que no desaparecen a la vitropresión. Cuando las lesiones están algo sobre-elevadas se denomina "palpable"
3. La trombopenia severa ( $<20.000$ ) o con sangrado activo deberá derivarse a urgencias para tratamiento. Las causas de trombocitopenia incluyen infecciones (VHB, VIH), síndromes hematológicos (leucemia, mielodisplasia, aplasia medular, inmunodepresión), fármacos, alcohol y otras drogas, transfusiones, trasplante, púrpura trombocitopénica trombótica y púrpura trombocitopénica idiopática.
4. La afectación sistémica puede incluir alteración del estado general, fiebre, artralgias y alteraciones analíticas de afectación multiorgánica, que constatan afectación visceral más allá de la cutánea.
5. Ante la sospecha de endocarditis, será necesario pedir hemocultivos y ecocardiograma
6. Perfil EAS: análisis inicial habitualmente disponible en Atención Primaria para enfermedades autoinmunes, que incluye hemograma, bioquímica básica, velocidad de sedimentación, proteína C reactiva, anticuerpos antinucleares (ANA) y orina elemental.
7. La petición de serologías se orientará según la anamnesis y factores de riesgo
8. Cabe la posibilidad de biopsiar otros órganos afectados

## BIBLIOGRAFÍA

Blanco R, Martínez-Taboada VM, Rodríguez-Valverde V, García-Fuentes M. Cutaneous vasculitis in children and adults. Associated diseases and etiologic factors in 303 patients. *Medicine* 1998 Nov;77(6):403-18.

Calvo-Río V, Loricera J, Mata C, Martín L, Ortiz-Sanjuán F, Alvarez L, et al. Henoch-Schönlein purpura in northern Spain: clinical spectrum of the disease in 417 patients from a single center. *Medicine* 2014 Mar;93(2):106-13.

Sanz Alonso MA, Vicente García V. Directrices de diagnóstico, tratamiento y seguimiento de la PTI. Documento de consenso. Sociedad Española de Hematología y Hemoterapia SEHH. Prodrug Multimedia, Madrid 2011 <http://www.sehh.es/documentos/40/Guia%20PTI.pdf>

# ENFERMEDADES AUTOINMUNES SISTÉMICAS GUÍA PARA DERIVACIÓN EN ATENCIÓN PRIMARIA SER-SEMFYC

## ERITEMA NODOSO

Dr. Fernando León Vázquez

Sociedad Española de Medicina Familiar y Comunitaria (SEMFYC)

Especialista en Medicina Familiar y Comunitaria

Centro de Salud San Juan de la Cruz. Pozuelo de Alarcón (Madrid)

Dr. Jaime Calvo Alén

Sociedad Española de Reumatología (SER)

Especialista en Reumatología

Hospital Universitario Araba. Vitoria-Gasteiz

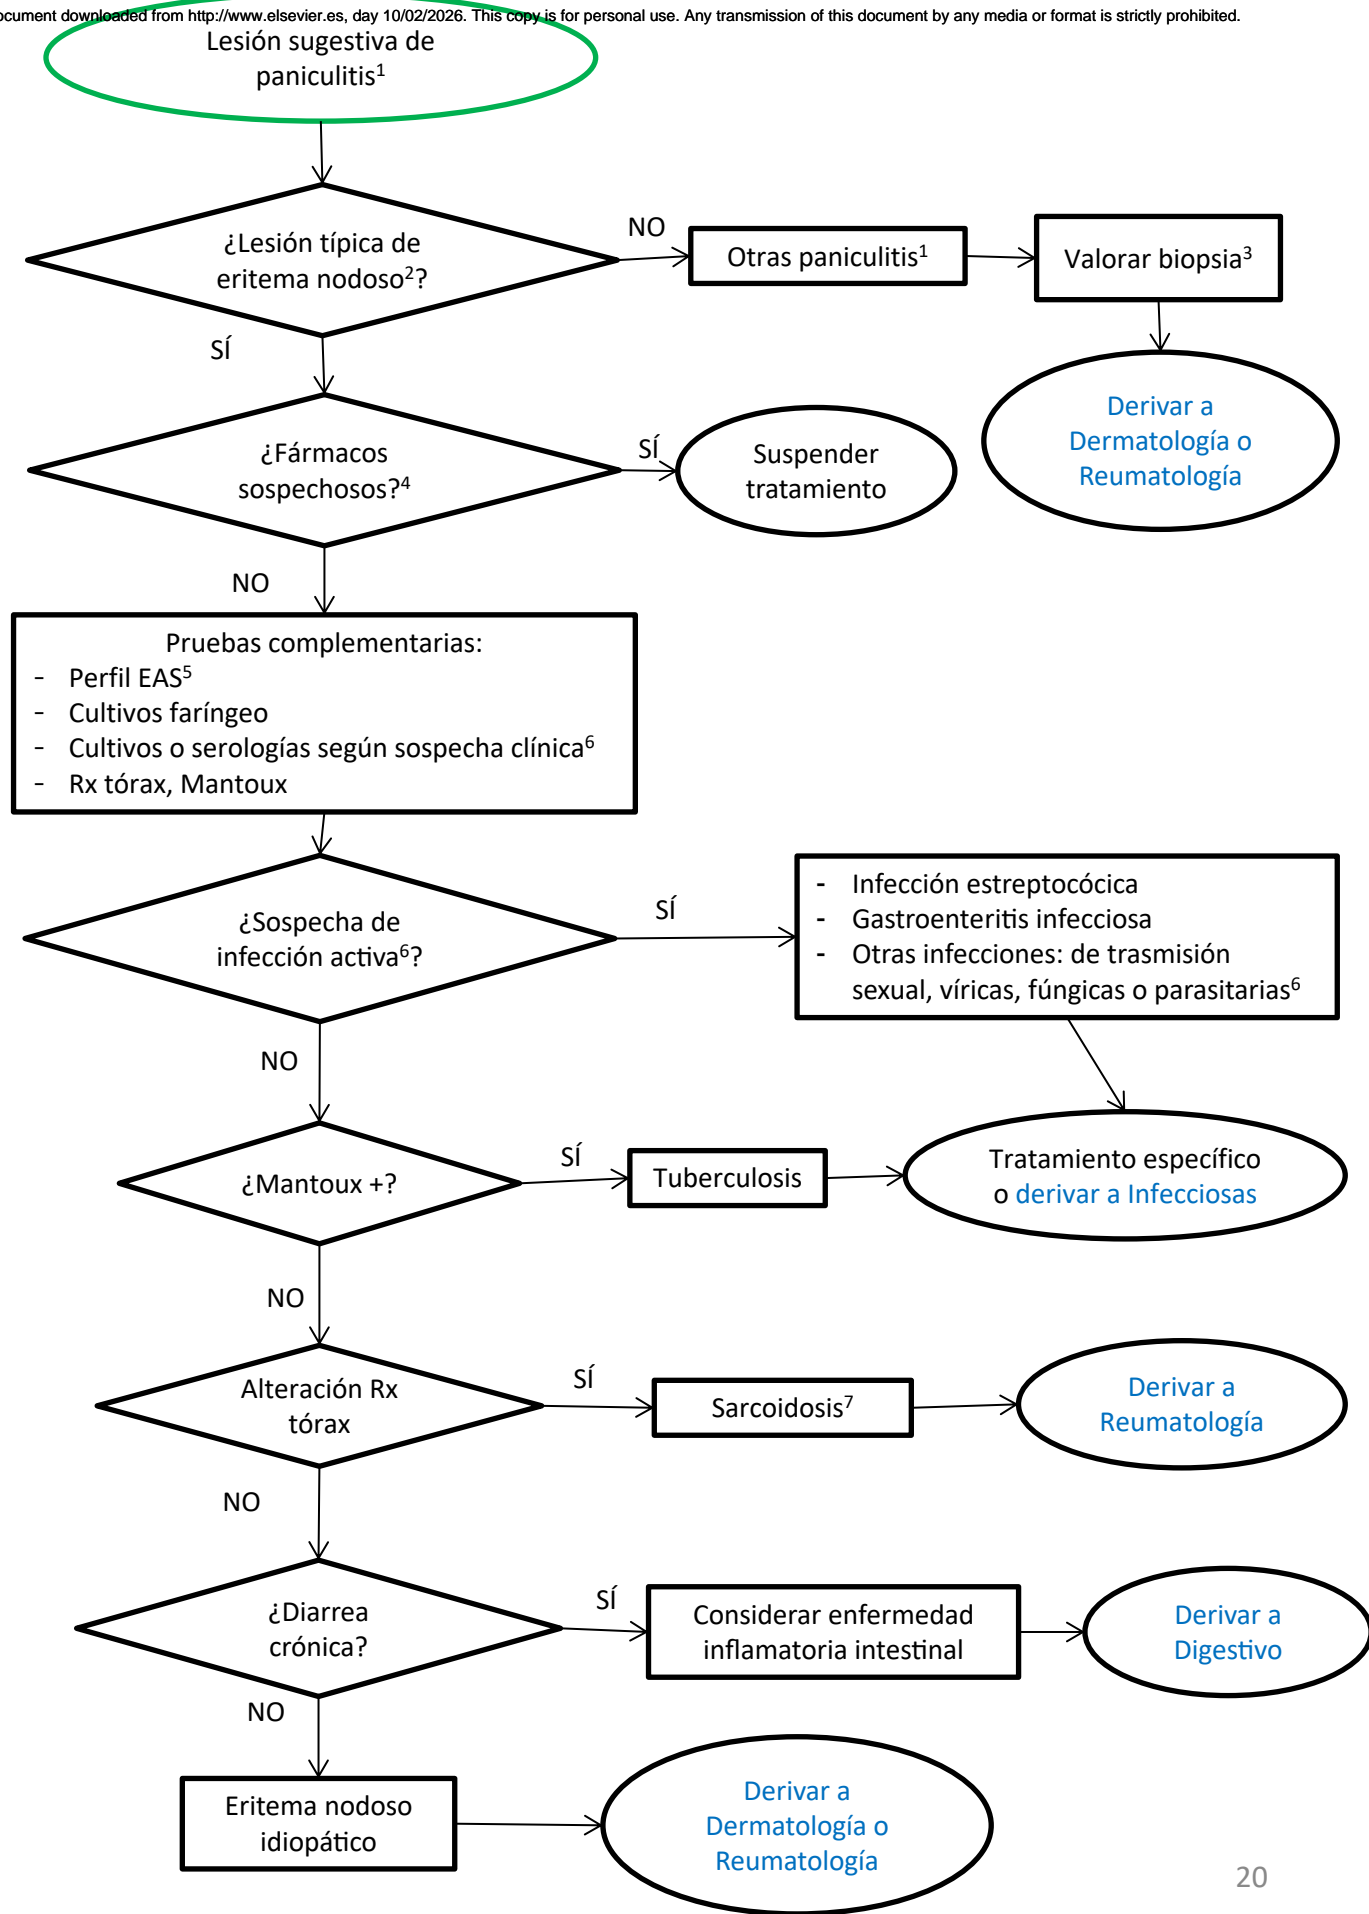

## NOTAS

1. Las paniculitis son enfermedades inflamatorias del tejido celular subcutáneo que se manifiestan por la aparición de nódulos o placas inflamatorias, dolorosas a menudo, subcutáneas y a veces afectando a la superficie cutánea. Según su expresión anatómo patológica pueden ser de predominio septal (eritema nodoso, poliarteritis nodosa cutánea, nódulos reumatoideos...) o de predominio lobulillar (enfermedad Crohn, nódulos leprosos, paniculitis esclerosante, paniculitis pancreática, paniculitis lúpica, sarcoidosis...)
2. El eritema nodoso (EN) es el tipo más frecuente de paniculitis, más frecuente en mujeres. Son nódulos eritematosos violáceos de 1-5 cm, profundos, dolorosos, preferentemente en la cara anterior de las piernas, que evolucionan con apariencia de equimosis sin dejar cicatriz, desapareciendo en un período de 2-8 semanas. Son idiopáticos entre el 30-50%
3. Según la evolución, puede considerarse una biopsia cutánea para identificar el patrón anatomopatológico, o hacer diagnóstico diferencial con otros procesos, como el linfoma
4. Fármacos sospechosos: penicilina, sulfamidas, salicilatos, dapsona, compuestos yodados, anticonceptivos orales, gestágenos
5. Perfil EAS: análisis inicial habitualmente disponible en Atención Primaria para enfermedades autoinmunes, que incluye hemograma, bioquímica básica, velocidad de sedimentación, proteína C reactiva, anticuerpos antinucleares (ANA) y orina elemental.
6. Entre las causas infecciosas destacan la infección estreptocócica, gastroenteritis por Yersinia, Salmonella o Campylobacter y la tuberculosis. Son más raras la coccidioidomicosis, infecciones virales del tracto respiratorio superior, brucelosis, mycoplasmas, hepatitis B, histoplasmosis, gonococia, meningococia, sífilis, VIH, bordetella, enfermedad por arañazo de gato, blastomicosis, giardiasis
7. La sarcoidosis se caracteriza por la aparición de granulomas no necrosantes de células epitelioides en los órganos afectados (poliartritis, adenopatías e infiltrados pulmonares, uveítis, arritmias, insuficiencia cardíaca, pericarditis, hipercalcemia, afectación neurológica, hepática o cutánea)

## BIBLIOGRAFÍA

Bielsa Marsol MI. Paniculitis. En: Manual SER de diagnóstico y tratamiento de las enfermedades reumáticas autoinmunes sistémicas. Ed. Elsevier, Barcelona 2014: 93.98 [https://www.ser.es/wp-content/uploads/2015/09/Manual\\_ERAS.pdf](https://www.ser.es/wp-content/uploads/2015/09/Manual_ERAS.pdf)

Ibáñez Rubio M. Eritema nodosos. Protocolos diagnósticos terapia en pediatría. 2014; 1:151-155 [http://www.aeped.es/sites/default/files/documentos/16\\_eritema\\_nodoso.pdf](http://www.aeped.es/sites/default/files/documentos/16_eritema_nodoso.pdf)

Soter NA, Franks AG. La piel en las enfermedades reumáticas. En: Harris DE, Budd RC, Firestein GS, Genovese MC, Sergen JS, Ruddy S, Sledge CB (Eds). Kelley Tratado de Reumatología. Elsevier. Madrid, 2006: 677.

Varas P, Antúñez-Lay A, Bernucci JM, Cossio L, González S, Eymín G. Eritema nodoso: causas más prevalentes en pacientes que se hospitalizan para estudio, y recomendaciones para el diagnóstico. Rev Med Chil. 2016 Feb;144(2):162-8. [https://scielo.conicyt.cl/scielo.php?script=sci\\_arttext&pid=S0034-98872016000200003](https://scielo.conicyt.cl/scielo.php?script=sci_arttext&pid=S0034-98872016000200003)

# ENFERMEDADES AUTOINMUNES SISTÉMICAS GUÍA PARA DERIVACIÓN EN ATENCIÓN PRIMARIA SER-SEMFYC

## LIVEDO RETICULARIS

Dr. Jaime Calvo Alen

Sociedad Española de Reumatología (SER)

Especialista en Reumatología

Hospital Universitario Araba. Vitoria-Gasteiz

Dr. Fernando León Vázquez

Sociedad Española de Medicina Familiar y Comunitaria (SEMFYC)

Especialista en Medicina Familiar y Comunitaria

Centro de Salud San Juan de la Cruz. Pozuelo de Alarcón (Madrid)

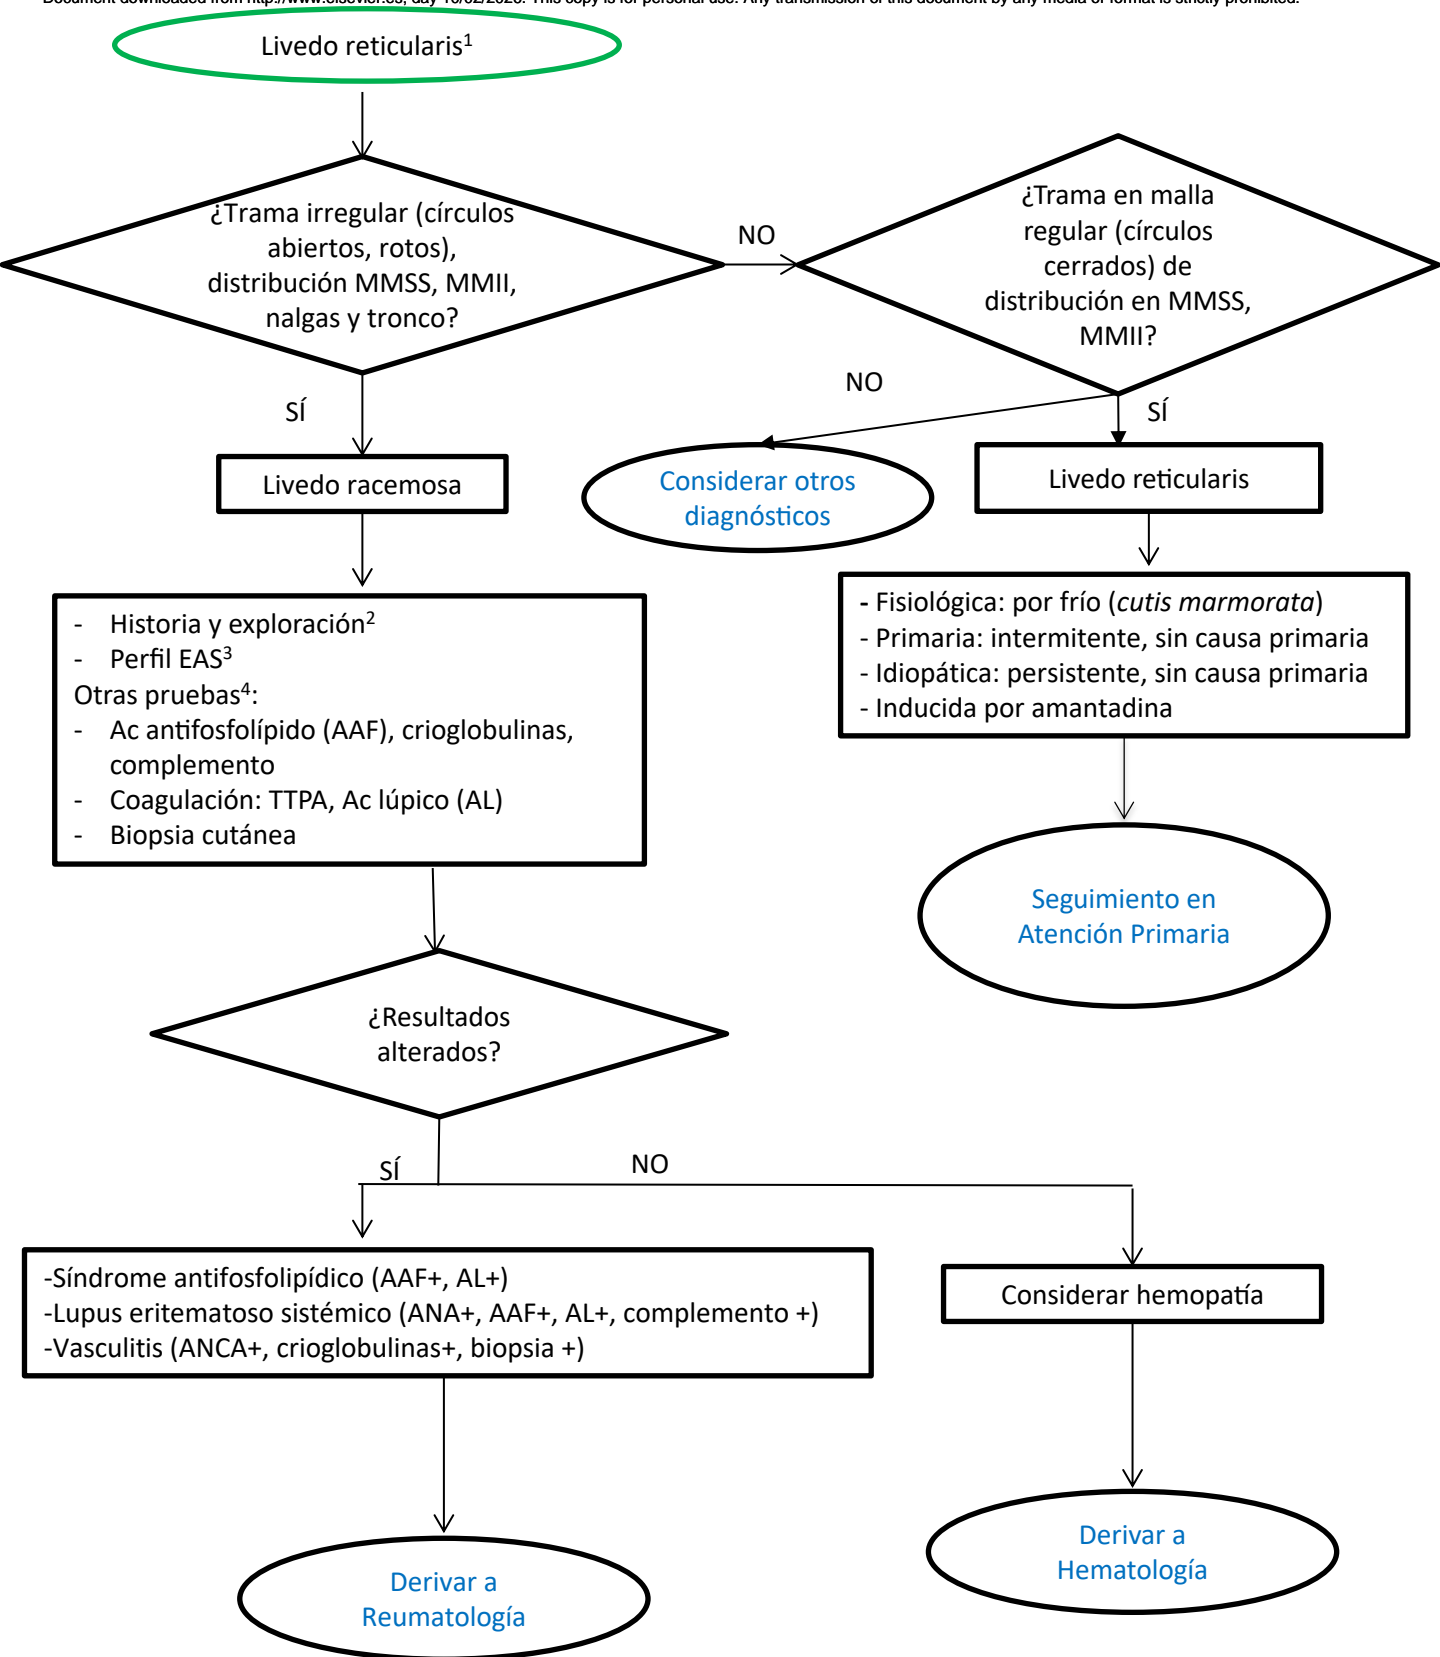

## NOTAS

1. Livedo reticularis: eritema violáceo formando polígonos o círculos de distribución en miembros.
2. Los datos objetivados por historia clínica o la exploración pueden por sí mismos ser indicativos de remisión a Reumatología.
3. Perfil EAS: análisis inicial habitualmente disponible en Atención Primaria para enfermedades autoinmunes, que incluye hemograma, bioquímica básica, velocidad de sedimentación, proteína C reactiva, anticuerpos antinucleares (ANA) y orina elemental.
4. Tras las pruebas iniciales pueden hacerse algunas más en Atención Primaria o se completarán en Reumatología.

## BIBLIOGRAFÍA

Gibbs MB, English JC 3rd, Zirwas MJ. Livedo reticularis: an update. *J Am Acad Dermatol* 2005; 52:1009-19.  
Uthman IW, Khamashta MW. Livedo racemosa: a striking dermatological sign for the antiphospholipid syndrome. *J Rheumatol* 2006; 33:2379-82.



# ENFERMEDADES AUTOINMUNES SISTÉMICAS GUÍA PARA DERIVACIÓN EN ATENCIÓN PRIMARIA SER-SEMFYC

## AFTAS ORALES Y GENITALES

Dr. Vicente Giner Ruiz

Sociedad Española de Medicina Familiar y Comunitaria (SEMFYC)

Especialista en Medicina Familiar y Comunitaria

Centro de Salud Ciudad Jardín. Alicante

Dr. Juan José Alegre Sancho

Sociedad Española de Reumatología (SER)

Especialista en Reumatología

Hospital Doctor Peset. Valencia

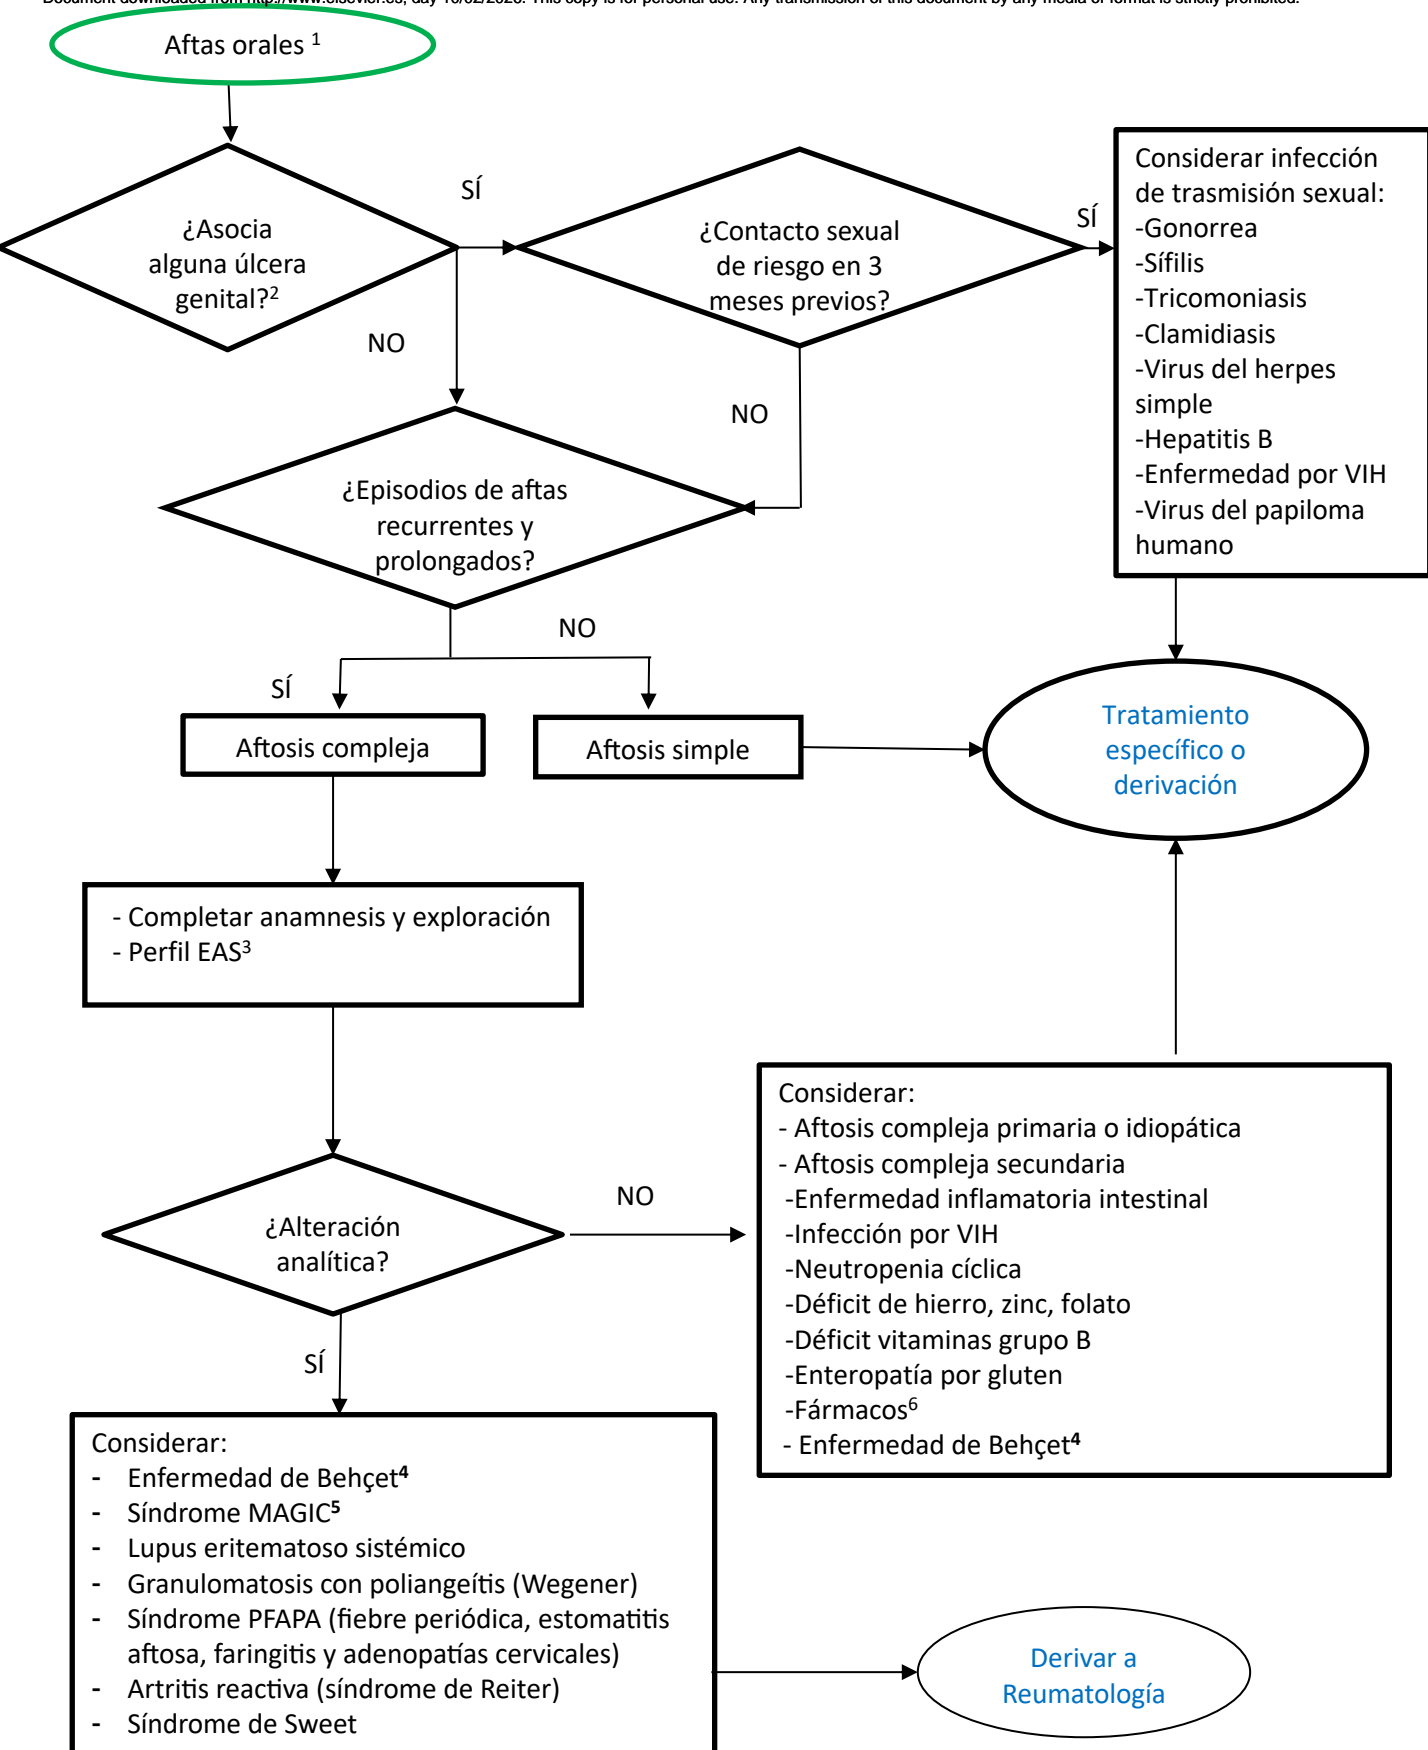

## NOTAS

1. Afta es una lesión ulcerada que asienta en la superficie mucosa en la que, a diferencia de la erosión, la pérdida de continuidad compromete a todo el epitelio de recubrimiento y puede afectar al tejido conjuntivo subyacente.
2. La aparición simultánea de lesiones orales y genitales sugiere enfermedad de Behçet<sup>4</sup>, incluyendo síndrome MAGIC<sup>5</sup> y la reacción a fármacos.
3. Perfil EAS: análisis inicial habitualmente disponible en Atención Primaria para enfermedades autoinmunes, que incluye hemograma, bioquímica básica, velocidad de sedimentación, proteína C reactiva, anticuerpos antinucleares (ANA) y orina elemental.
4. Criterios diagnósticos de la enfermedad de Behçet (*Davatchi et al*) al menos 4 puntos:
  - Aftas orales: 2 puntos
  - Aftas genitales: 2 puntos.
  - Lesiones oculares: uveítis anterior, posterior o vasculitis retiniana. 2 puntos.
  - Lesiones cutáneas: pseudofoliculitis, aftosis cutánea, eritema nodoso. 1 punto.
  - Afectación sistema nervioso central (signos piramidales, pares craneales, hipertensión intracraneal, cefalea, papiledema). 1 punto
  - Lesiones vasculares: trombosis venosa profunda, flebitis, aneurismas (especialmente de la aorta), trombosis arterial: 1 punto
  - Test de patergia positivo (opcional)
5. Síndrome MAGIC (siglas en inglés de úlceras orales, genitales e inflamación cartilaginosa): síndrome de solapamiento entre la enfermedad de Behçet y la policondritis recidivante
6. Principales fármacos (*Riera Matute et al*): tabla 1

## BIBLIOGRAFÍA

- Riera Matute G, Riera Alonso E. Aftosis oral recurrente en Reumatología. *Reumatol Clín* 2011; 7: 323-8.
- Mortazavi H, Safi Y, Baharvand M, Rahmani S. Diagnostic features of common oral ulcerative lesions: an updated decision tree. *Int J of Dent* 2016. <http://dx.doi.org/10.1155/2016/7278925>.
- Sojo Dorado J, Olmo Montes J, Peñas Espinar C, Muniáin Ezcurra MA. Protocolo diagnóstico y terapéutico de las úlceras genitales. *Medicine* 2014; 11: 3024-8
- Schemel-Suárez M, López-López J, Chimenos-Küstner E. Úlceras orales: diagnóstico diferencial y tratamiento. *Med Clin (Barc)* 2015; 145:499-503.
- Davatchi F, Assaad-Khalil S, Calamia KT, Crook JE, Sadeghi-Abdollahi B, et al. International Criteria for Behçet's Disease (ICBD): a collaborative study of 27 countries on the sensitivity and specificity of the new criteria. International. Team for the Revision of the International Criteria for Behçet's Disease (ITR-ICBD). *J Eur Acad Dermatol Venereol* 2014; 28: 338-47.
- Firestein GS, Gruber HE, Weisman MH, Zvaifler NJ, Barber J, O'Duffy JD. Mouth and genital ulcers with inflamed cartilage: MAGIC syndrome. Five patients with features of relapsing polychondritis and Behçet's disease. *Am J Med*. 1985;79:65-72

Tabla 1. Fármacos que pueden producir úlceras orales

|                                                                                                                                                                                                                                                                                                                      |                                                                                                                                                                                                                                                                                                                                  |                                                                                                                                                                                                                                                                                                     |                                                                                                                                                                                                                                                                                                                |
|----------------------------------------------------------------------------------------------------------------------------------------------------------------------------------------------------------------------------------------------------------------------------------------------------------------------|----------------------------------------------------------------------------------------------------------------------------------------------------------------------------------------------------------------------------------------------------------------------------------------------------------------------------------|-----------------------------------------------------------------------------------------------------------------------------------------------------------------------------------------------------------------------------------------------------------------------------------------------------|----------------------------------------------------------------------------------------------------------------------------------------------------------------------------------------------------------------------------------------------------------------------------------------------------------------|
| Alendronato<br>Alprazolam<br>Alopurinol<br>Aspirina<br>Atorvastatina<br>Aurotiomalato<br>Azatioprina<br>Aztreonam<br>Barbitúricos<br>Bleomicina<br>Captopril<br>Carbamazepina<br>Ciclosporina<br>Cisplatino<br>Citarabina<br>Claritromicina<br>Clonazepam<br>Cloranfenicol<br>Cloroquina<br>Clorpromacina<br>Codeína | Diclofenaco<br>Dideoxicitidina<br>Diltiazem<br>Disopiramida<br>Docetaxel<br>Doxorubicina<br>Emepromio-<br>bromuro<br>Enalapril<br>Eritromicina<br>Estreptomicina<br>Everolimus<br>Fenilbutazona<br>Fenindiona<br>Fenitoína<br>Fluconazol<br>Flunisolida<br>Fluoxetina<br>Ganciclovir<br>Hidralazina<br>Hidroxiurea<br>Ibuprofeno | Indometacina<br>Interferón<br>Interleukima-2<br>Imipramina<br>Isoprenalina<br>Ketorolaco<br>Lamotrigina<br>Leflunomida<br>Levamisol<br>Litio<br>Losartán<br>Melfan<br>Metamizol<br>Metotrexato<br>Metronidazol<br>Mitomicina<br>Molgramostim<br>Naproxeno<br>Nicorandil<br>Nifedipino<br>Olanzapina | Pancretaina<br>Penicilamina<br>Penicilina<br>Potasio<br>Proguanilo<br>Prometazina<br>Propanolol<br>Propiltiouracilo<br>Quinidina<br>Ritonavir<br>Saquinavir<br>Sertralina<br>Sulfonamidas<br>Sulindaco<br>Terbutalina<br>Tetraciclinas<br>Vancomicina<br>Vincristina<br>Venlafaxina<br>Warfarina<br>Zidovudina |
|----------------------------------------------------------------------------------------------------------------------------------------------------------------------------------------------------------------------------------------------------------------------------------------------------------------------|----------------------------------------------------------------------------------------------------------------------------------------------------------------------------------------------------------------------------------------------------------------------------------------------------------------------------------|-----------------------------------------------------------------------------------------------------------------------------------------------------------------------------------------------------------------------------------------------------------------------------------------------------|----------------------------------------------------------------------------------------------------------------------------------------------------------------------------------------------------------------------------------------------------------------------------------------------------------------|

Tomado de: Riera Matute G, Riera Alonso E. Aftosis oral recurrente en Reumatología. Reumatol Clín 2011; 7: 323-328

# ENFERMEDADES AUTOINMUNES SISTÉMICAS GUÍA PARA DERIVACIÓN EN ATENCIÓN PRIMARIA SER-SEMFYC

## SINUSITIS CRÓNICA

Dr. Juan José Alegre Sancho

Sociedad Española de Reumatología (SER)

Especialista en Reumatología

Hospital Doctor Peset. Valencia

Dr. Vicente Giner Ruiz

Sociedad Española de Medicina Familiar y Comunitaria (SEMFYC)

Especialista en Medicina Familiar y Comunitaria

Centro de Salud Ciudad Jardín. Alicante

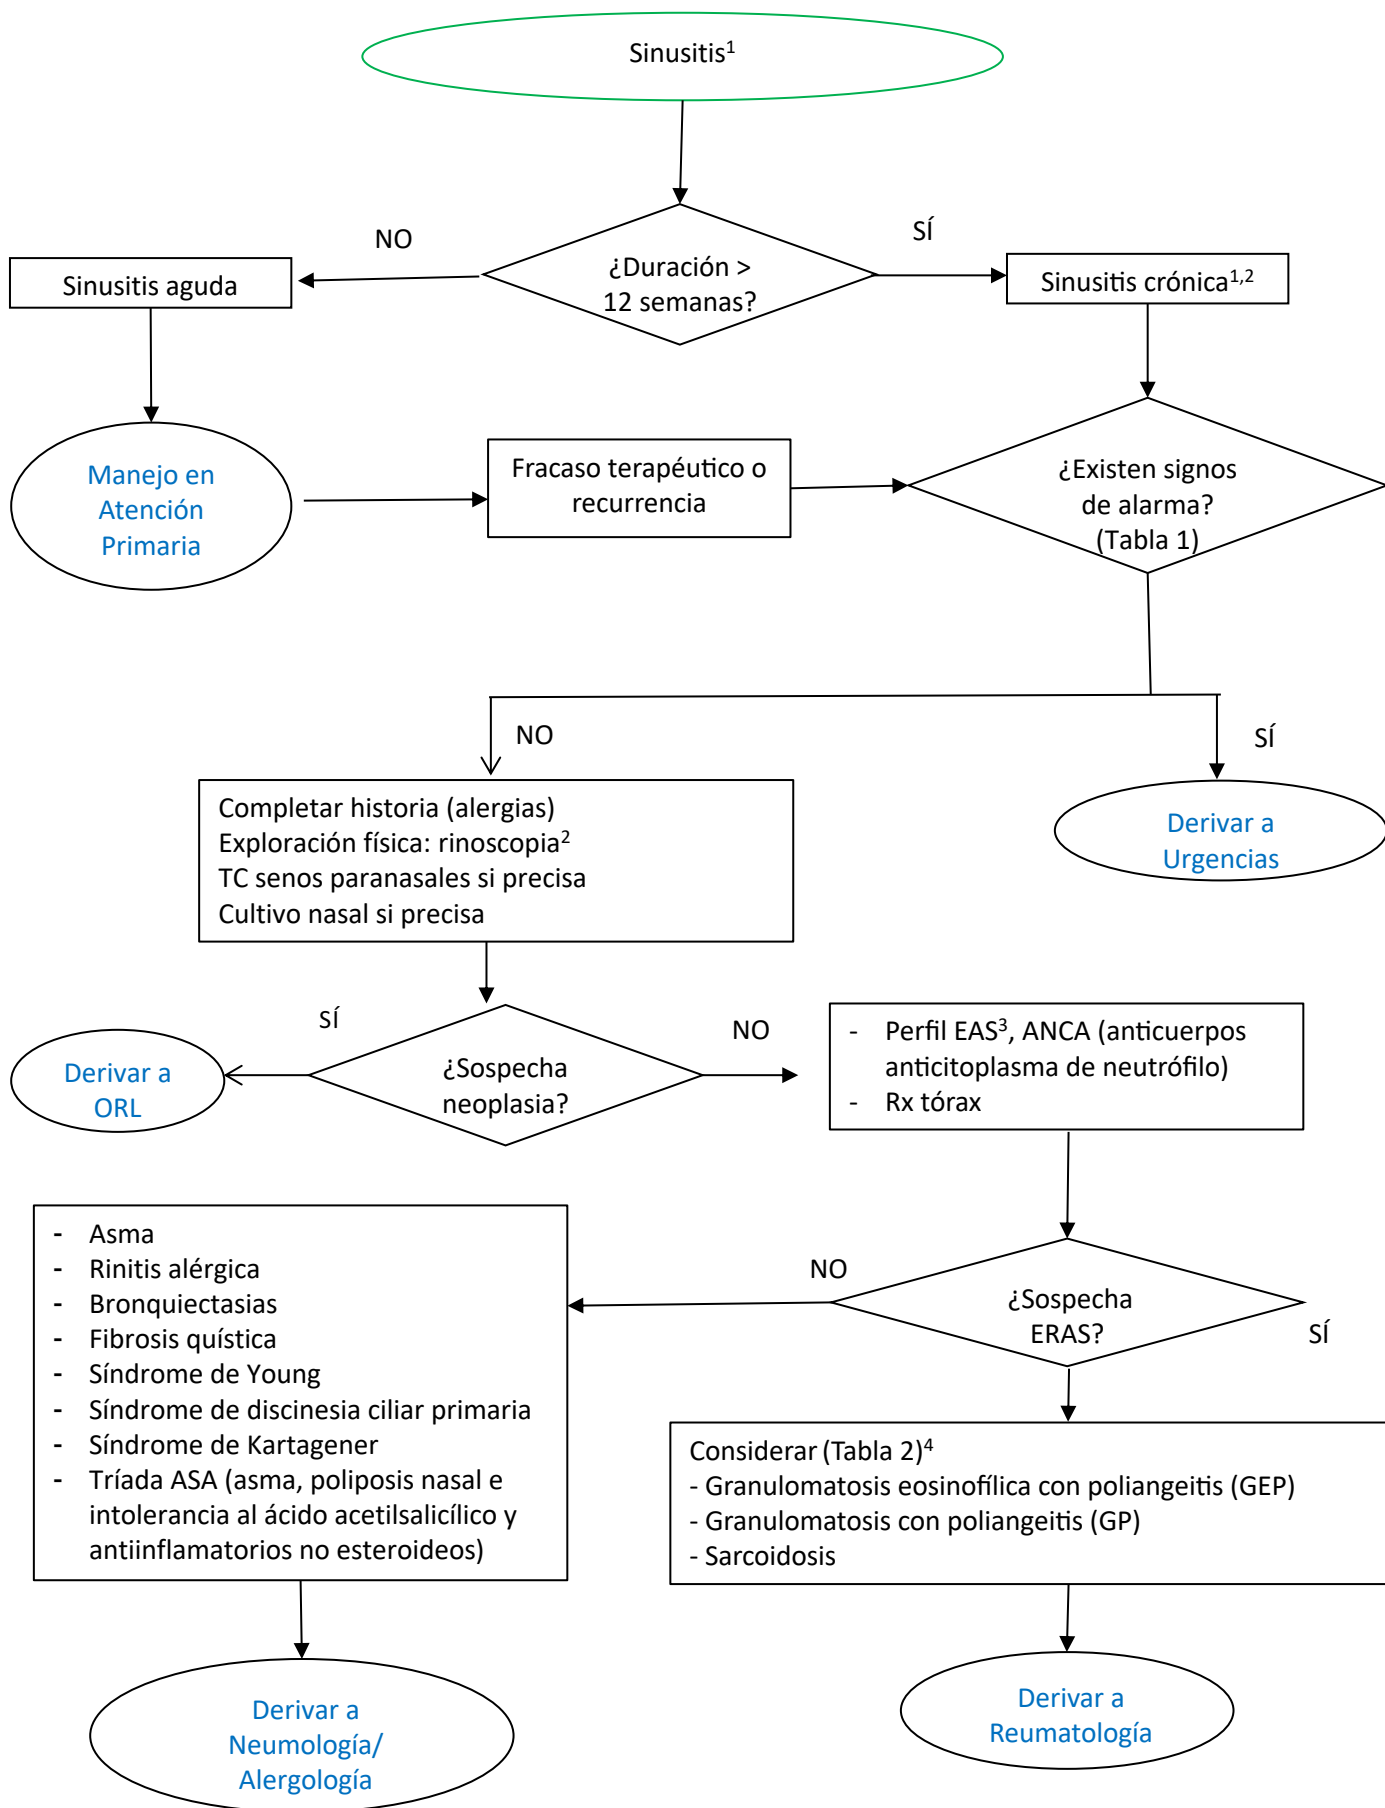

## NOTAS

1. La sinusitis crónica es una enfermedad multifactorial con trastornos mucociliares, procesos infecciosos, alérgicos e inflamatorios de la mucosa, con una prevalencia del 5% en Europa. Se caracteriza por dos o más de los siguientes síntomas: obstrucción/congestión nasal, hiposmia/anosmia, rinorrea anterior o posterior y dolor o sensación de presión facial. Para su confirmación debe acompañarse de signos endoscópicos (pólipos, edema con rinorrea mucopurulenta en meato medio) y/o de alteraciones en el TC de senos (cambios en el complejo ostiomeatal y/o en la mucosa de los senos). La Rx de senos no se considera una técnica fiable en el diagnóstico de sinusitis.
2. Diferenciar la sinusitis crónica en “con” o “sin” pólipos nasales es relevante para el tratamiento y pronóstico, aunque existe cierto solapamiento. Sin embargo, no es útil para diferenciar si existe o no enfermedad autoinmune, por eso no se menciona en este tema.
3. Perfil EAS: análisis inicial habitualmente disponible en Atención Primaria para enfermedades autoinmunes, que incluye hemograma, bioquímica básica, velocidad de sedimentación, proteína C reactiva, anticuerpos antinucleares (ANA) y orina elemental.
4. Las patologías autoinmunes sistémicas a descartar son la granulomatosis con poliangéitis (GP) o Wegener, y la granulomatosis eosinofílica con poliangéitis (GAP) o Churg-Strauss. Otra enfermedad granulomatosa, como la sarcoidosis, también puede tener una presentación nasosinusal crónica. Esta presentación clínica resulta rara y multifactorial en otras entidades.

## BIBLIOGRAFÍA

- Suárez C, Gil-Carcedo LM, Marco J, Medina JE, Ortega P, Trinidad J. Tratado de Otorrinolaringología y Cirugía de cabeza y cuello. Tomo 1. Madrid: Ed. Panamericana; 2007. 840 p.
- Guilemany JM, Mullol J. ¿Cómo diagnosticar a un paciente con rinosinusitis crónica/poliposis nasal? JANO 2007; 1665: 29-32.
- Rosenfeld RM, Piccirillo JF, Chandrasekhar SS, Brook I, Ashok Kumar K, Kramper M, et al. Clinical practice guideline (update): adult sinusitis. Otolaryngol Head Neck Surg 2015; 152(2 Suppl): S1-S39.
- Kuan EC, Suh JD. Systemic and Odontogenic Etiologies in Chronic Rhinosinusitis. Otolaryngol Clin North Am 2017; 50(1): 95-111.
- Kohanski MA, Reh DD. Chapter 11: Granulomatous diseases and chronic sinusitis. Am J Rhinol Allergy 2013;27 (Suppl 1): S39-41.
- Cannady SB, Batra PS, Koenig C, Lorenz RR, Citardi MJ, et al. Sinonasal Wegener granulomatosis: a single-institution experience with 120 cases. Laryngoscope 2009; 119(4): 757-61.
- Ryan MW. Diseases associated with chronic rhinosinusitis: what is the significance? Curr Opin Otolaryngol Head Neck Surg 2008; 16(3): 231-6.
- Documento de Consenso sobre Poliposis Nasal SEAIC - SEORL. PROYECTO POLINA. J Investig Allergol Clin Immunol 2011; 21 (Suppl. 1): 1-58.
- Fokkens WJ, Lund VJ, Mullol J, Bachert C, Alobid I, Baroodi F, et al. EPOS 2012: European Position Paper on Rhinosinusitis and Nasal Polyps 2012. A summary for otorhinolaryngologists. Rhinology 2012; 50(1): 1-12.

Tabla 1. Signos de alarma

- Signos orbitarios:
  - Edema periorbitario
  - Desplazamiento globo ocular
  - Diplopia
  - Disminución agudeza visual
  - Oftalmoplejia
- Fiebre elevada
- Signos meníngeos
- Focalidad neurológica o convulsiones
- Epistaxis recurrente
- Costras
- Cacosmia

Tabla 2. Sospecha de granulomatosis eosinofílica con poliangéitis (GEP) o granulomatosis con poliangéitis (GP)

- Epistaxis recurrente
- Destrucción de senos o septos (GP)
- Afección concomitante área ORL (GP)
- Clínica sistémica
- Infiltrados pulmonares (GEP)
- Nódulos pulmonares (GP)
- Deterioro de función renal
- Vasculitis cutánea
- Neuropatía periférica
- Afectación ocular (GP)
- Asociación a asma/rinitis alérgica/poliposis nasal (GEP)
- Eosinofilia > 10% (GEP)
- Cardiopatía (GEP)

# ENFERMEDADES AUTOINMUNES SISTÉMICAS

## GUÍA PARA DERIVACIÓN EN ATENCIÓN PRIMARIA

### SER-SEMFYC

# XEROSTOMÍA

Dr. Juan José Alegre Sancho

Sociedad Española de Reumatología (SER)

Especialista en Reumatología

Hospital Doctor Peset. Valencia

Dr. Vicente Giner Ruiz

Sociedad Española de Medicina Familiar y Comunitaria (SEMFYC)

Especialista en Medicina Familiar y Comunitaria

Centro de Salud Ciudad Jardín. Alicante



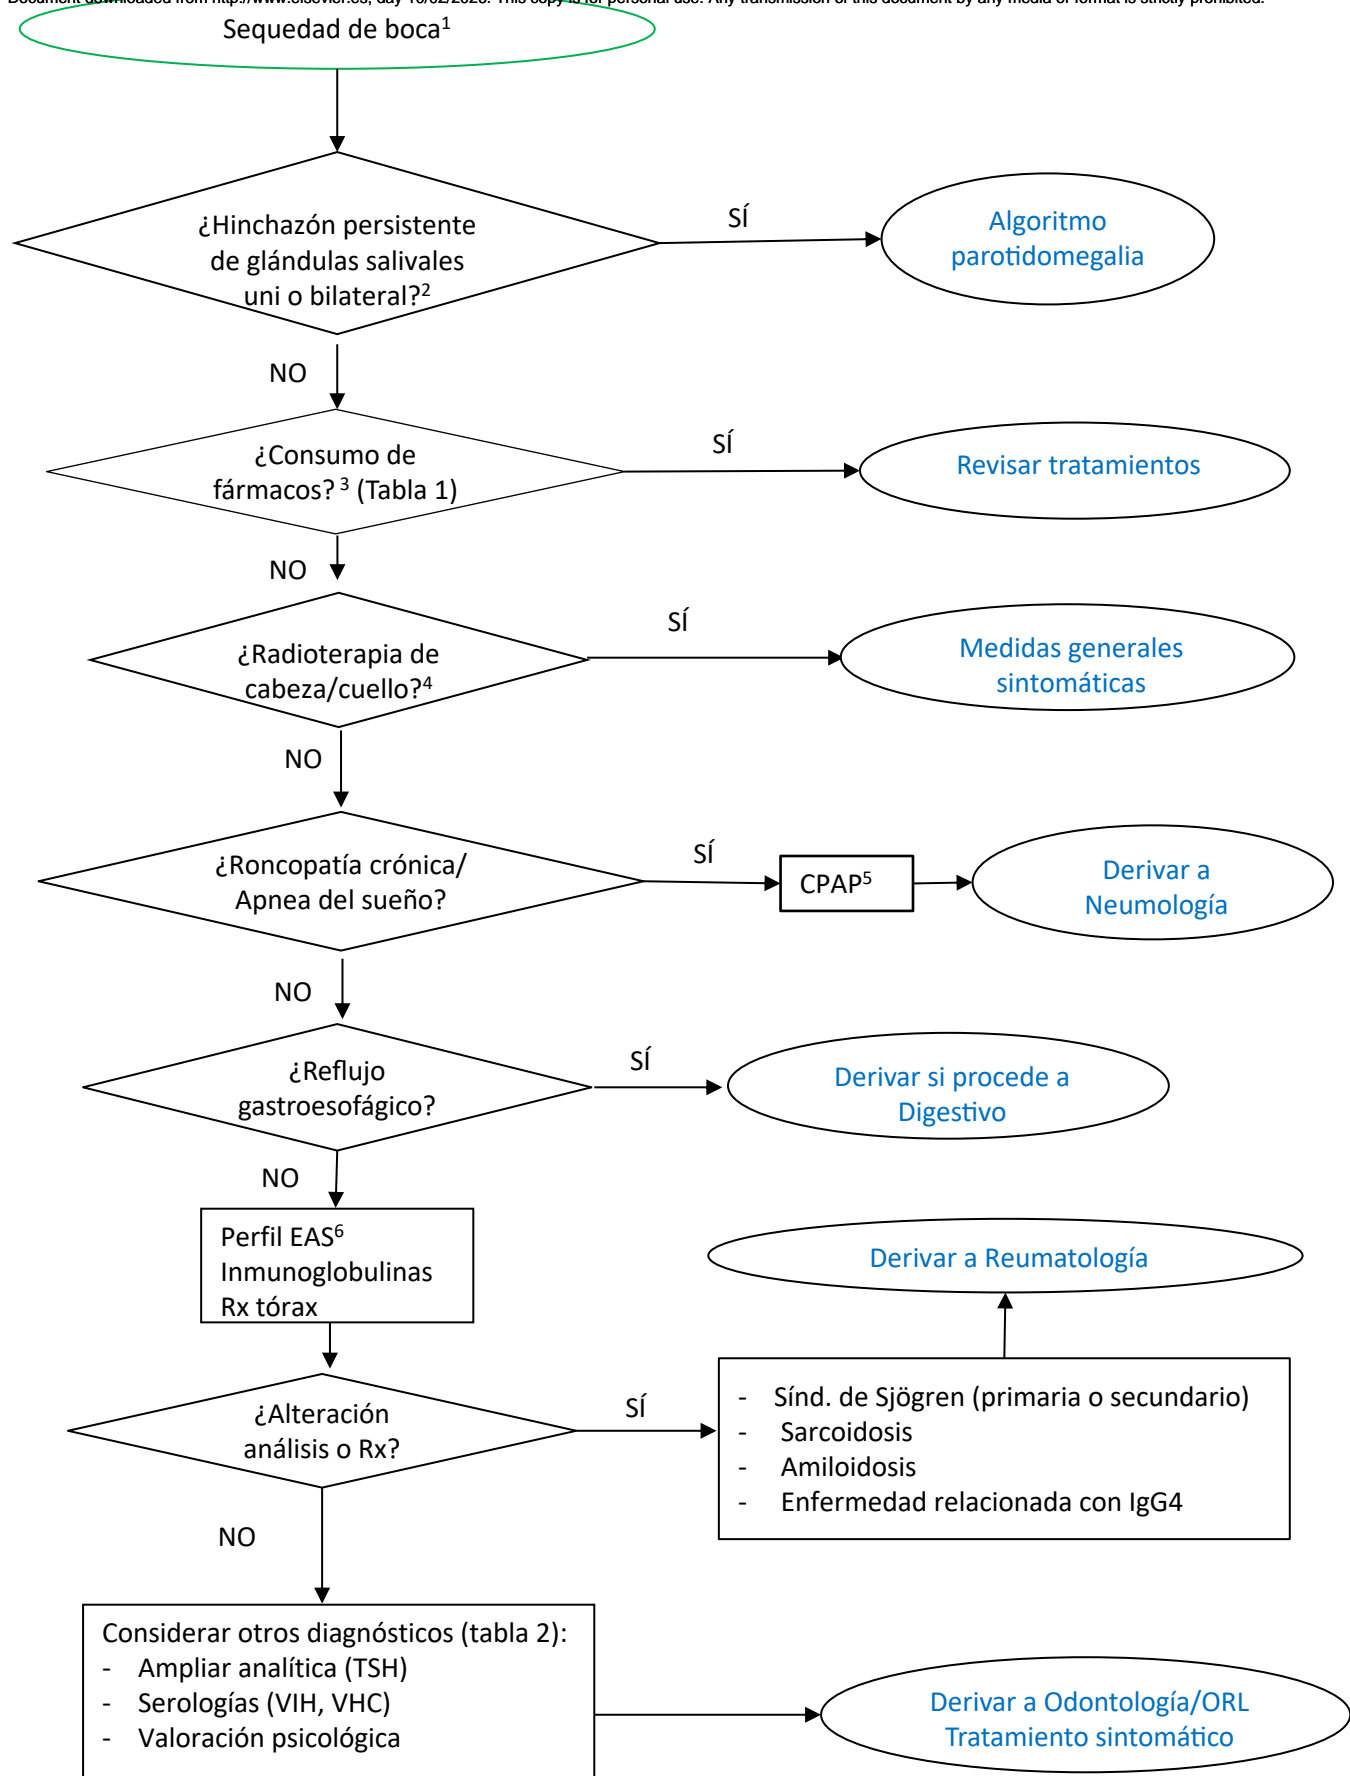

## NOTAS

1. La xerostomía es la sensación subjetiva de boca seca que puede o no ir acompañada de hiposialia<sup>2</sup>. Su prevalencia en Europa es del 24-27% en mujeres y del 18-21% en varones, pudiendo aumentar hasta un 55% en ancianos. Puede afectar la nutrición, a la salud psicológica, producir sensación de ardor o dolor en la mucosa oral y disgeusia. Incrementa la susceptibilidad a enfermedad periodontal e incrementa el desarrollo de placa y caries dental, así como de infecciones orales por *Cándida*.
2. La xerostomía se acompaña de **hiposialia** (reducción objetiva del flujo salival, estimulado o no estimulado). Se considera hiposialia un valor  $<0,1$  ml/min en reposo, o  $<0,4$  ml/min para la estimulada. , podremos evidenciar la ausencia de saliva en el suelo de la boca, mucosa oral seca, con pérdida de brillo, eritematosa y friable. La lengua suele mostrarse seca, rojiza, fisurada y depapilada. Son frecuentes la enfermedad periodontal, la caries y la pérdida de piezas dentarias.
3. Fármacos: es la causa más frecuente en relación con fármacos con acción anticolinérgica, pueden inducir o agravar la xerostomía (tabla 1)
4. Radioterapia de cabeza o cuello. Puede ser recuperable a dosis  $< 25$  Gy, pero irreversible si  $> 60$  Gy.
5. CPAP: presión continua positiva en vía aérea, para el tratamiento del síndrome de apnea-hipoapnea del sueño
6. Perfil EAS: análisis inicial habitualmente disponible en Atención Primaria para enfermedades autoinmunes, que incluye hemograma, bioquímica básica, velocidad de sedimentación, proteína C reactiva, anticuerpos antinucleares (ANA) y orina elemental.

## BIBLIOGRAFÍA

- Villa A, Connell CL, Abati S. Diagnosis and management of xerostomia and hyposalivation. Therapeutics and clinical risk management 2015; 11: 45-51.
- Aflaki E, Erfani T, Manolios N, Schifter M. An approach to the patient with a dry mouth. Medicine Today 2014; 15: 30-37.
- López-López J, Jané Salas E, Chimenos Küstner E. Pronóstico y tratamiento de la boca seca. Revisión sistemática. Med Clin 2014; 142: 119-124.
- De Luca Monasterios FM, Roselló Llabrés X. Etiopatogenia y diagnóstico de la boca seca. Av Odontoestomatol 2014; 30: 121-128.
- Hopcraft MS, Tan C. Xerostomia: an update for clinicians. Australian Dental Journal 2010; 55: 238-244.
- Patricio Ulloa B, Felipe Fredes C. Manejo actual de la xerostomía. Rev Otorrinolaringol Cir Cabeza Cuello 2016; 76: 243-248.

Tabla 1. Fármacos xerogénicos

- Antihistamínicos
- Anticomiciales
- Antidepresivos, sales de litio
- Antipsicóticos
- Ansiolíticos y sedantes
- Antihipertensivos
- Diuréticos
- Antiparkinsonianos
- Antiarrítmicos
- Anticolinérgicos
- Opioides
- Otros: isoniazida, antirretrovirales

Tabla 2. Patologías asociadas

- Diabetes
- Hipotiroidismo
- Linfoma
- Infección por VIH / VHC
- Trasplante de medula ósea
- Tratamiento quimioterápico
- Depresión/ trastorno ansioso/ estrés
- Trastorno psicótico
- Demencia
- Desnutrición/malnutrición

# ENFERMEDADES AUTOINMUNES SISTÉMICAS GUÍA PARA DERIVACIÓN EN ATENCIÓN PRIMARIA SER-SEMFYC

## PARÓTIDOMEGALIA

Dr. Vicente Giner Ruiz

Sociedad Española de Medicina Familiar y Comunitaria (SEMFYC)

Especialista en Medicina Familiar y Comunitaria

Centro de Salud Ciudad Jardín. Alicante

Dr. Juan José Alegre Sancho

Sociedad Española de Reumatología (SER)

Especialista en Reumatología

Hospital Doctor Peset. Valencia

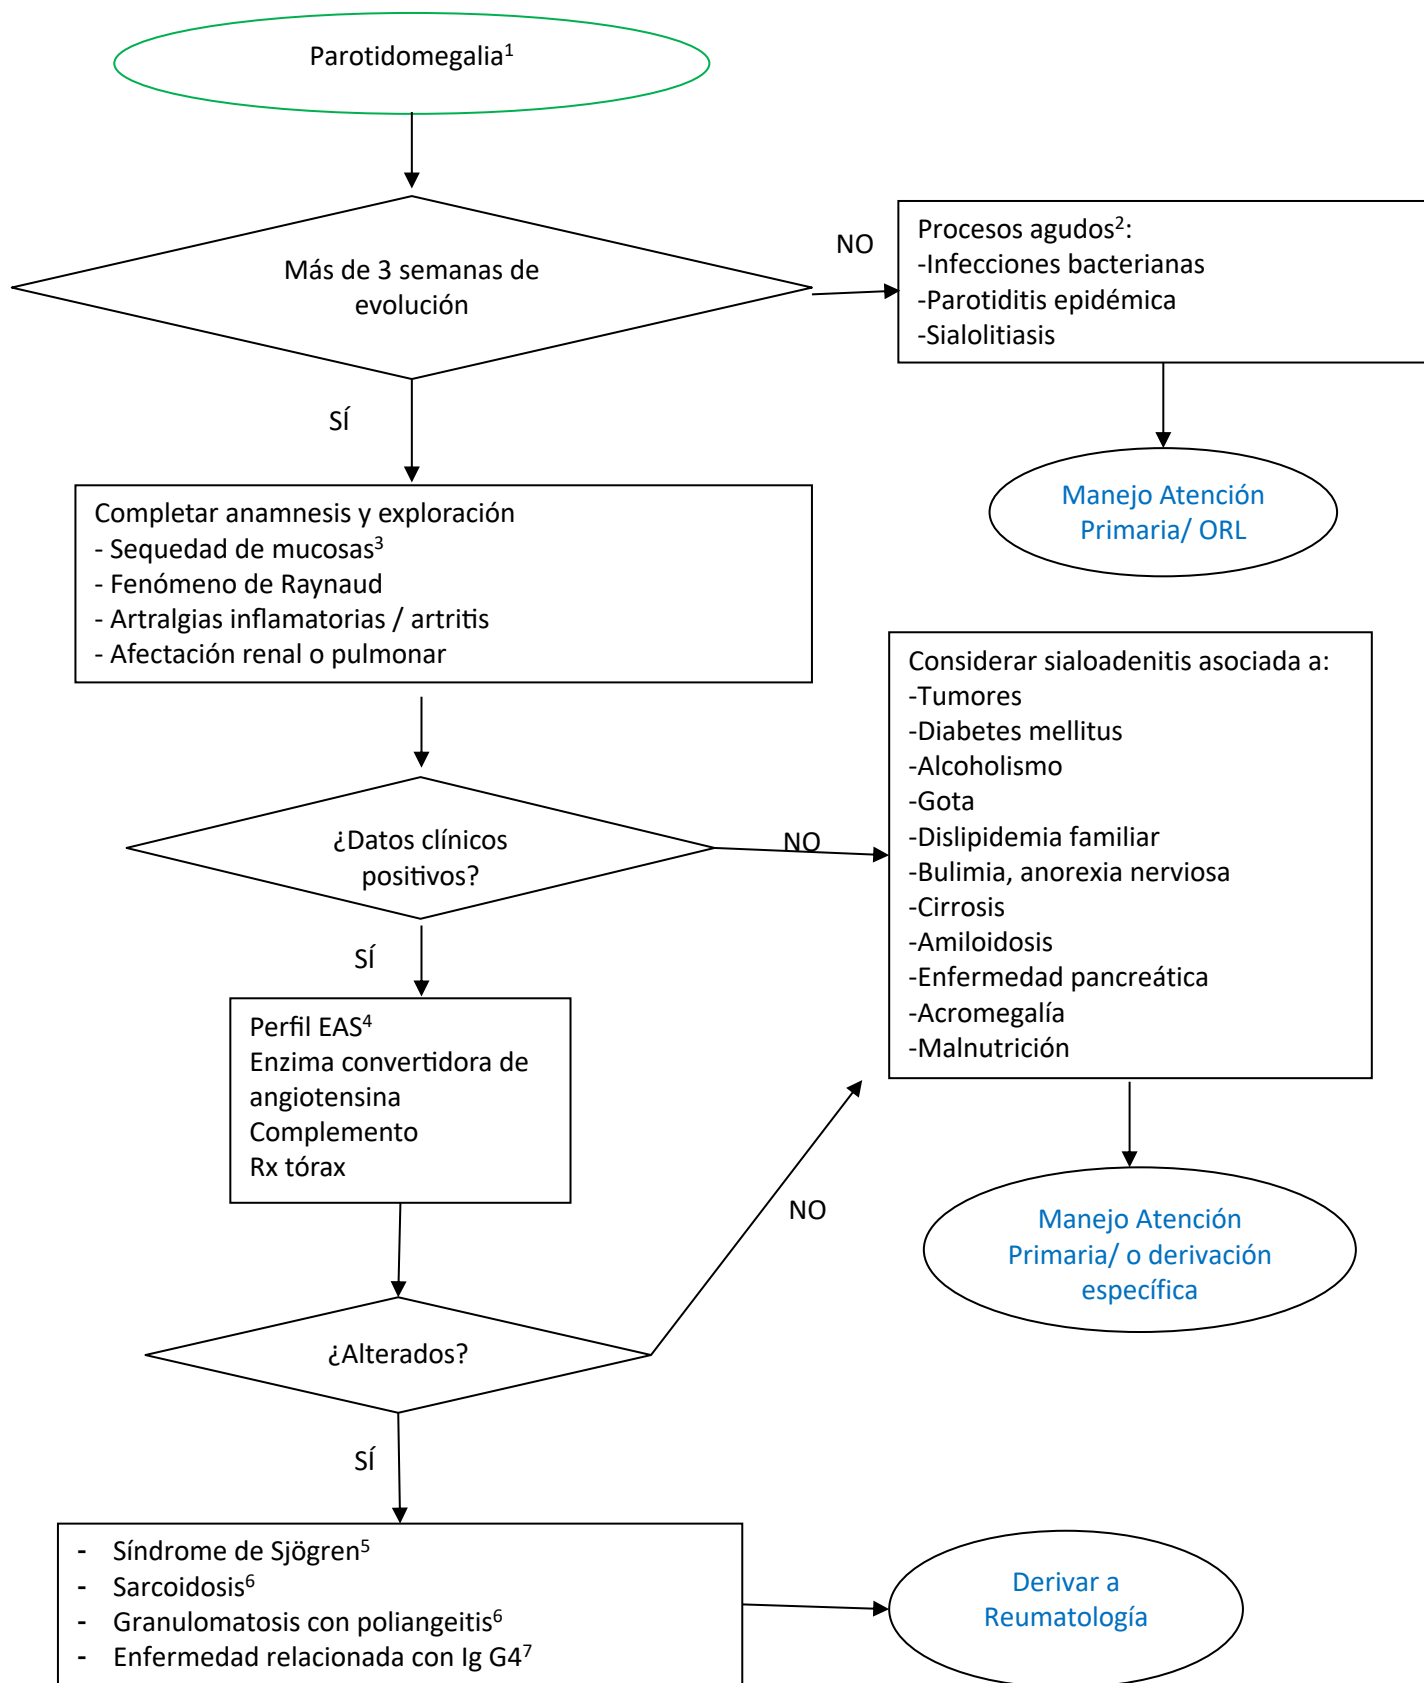

## NOTAS

1. La parotidomegalia es el aumento de tamaño de las glándulas parótidas, uni o bilateral
2. Parotidomegalia unilateral y con signos inflamatorios.
3. Xeroftalmia, xerostomía, nasal, cutánea y vaginal.
4. Perfil EAS: análisis inicial habitualmente disponible en Atención Primaria para enfermedades autoinmunes, que incluye hemograma, bioquímica básica, velocidad de sedimentación, proteína C reactiva, anticuerpos antinucleares (ANA) y orina elemental.
5. Sínd. Sjögren: enfermedad autoinmune más frecuentemente asociada a parotidomegalia bilateral, sin signos inflamatorios. Ocasionalmente puede ser aguda, uni o bilateral, con dolor por obstrucción de la glándula salival por un tapón mucoso.
6. Uni o bilateral; puede tener curso agudo.
7. Se afectan más las glándulas submaxilares, bilateralmente.

## BIBLIOGRAFÍA

Chen S, Paul BC, Myssiorek D. An Algorithm Approach to Diagnosing Bilateral Parotid Enlargement. *Otolaryngol Head Neck Surg* 2013;148:732–9.

Cornec D, Saraux A, Jousse-Joulin S, Pers JO, Boissramé-Gastrin S et al. The differential diagnosis of dry eyes, dry mouth, and parotidomegaly: a comprehensive review . *Clinic Rev Allerg Immunol* 2015; 49: 278–87.

Wilson KF, Meier JD, Ward PD. Salivary Gland Disorders. *Am Fam Physician* 2014; 89: 882-8.

Ardila-Suárez O, Abril A, Gómez-Puerta JA. Enfermedad relacionada con IgG4: revisión concisa de la literatura. *Reumatol Clin* 2017;13:160-6.

# ENFERMEDADES AUTOINMUNES SISTÉMICAS GUÍA PARA DERIVACIÓN EN ATENCIÓN PRIMARIA SER-SEMFYC

## FENÓMENO DE RAYNAUD

Dr. José Andrés Román Ivorra

Sociedad Española de Reumatología (SER)

Especialista en Reumatología

Hospital Universitario y Politécnico La Fe. Valencia

Dra. María D. Medina Abellán

Sociedad Española de Medicina Familiar y Comunitaria (SEMFYC)

Especialista en Medicina Familiar y Comunitaria

Centro de Salud Espinardo (Murcia)

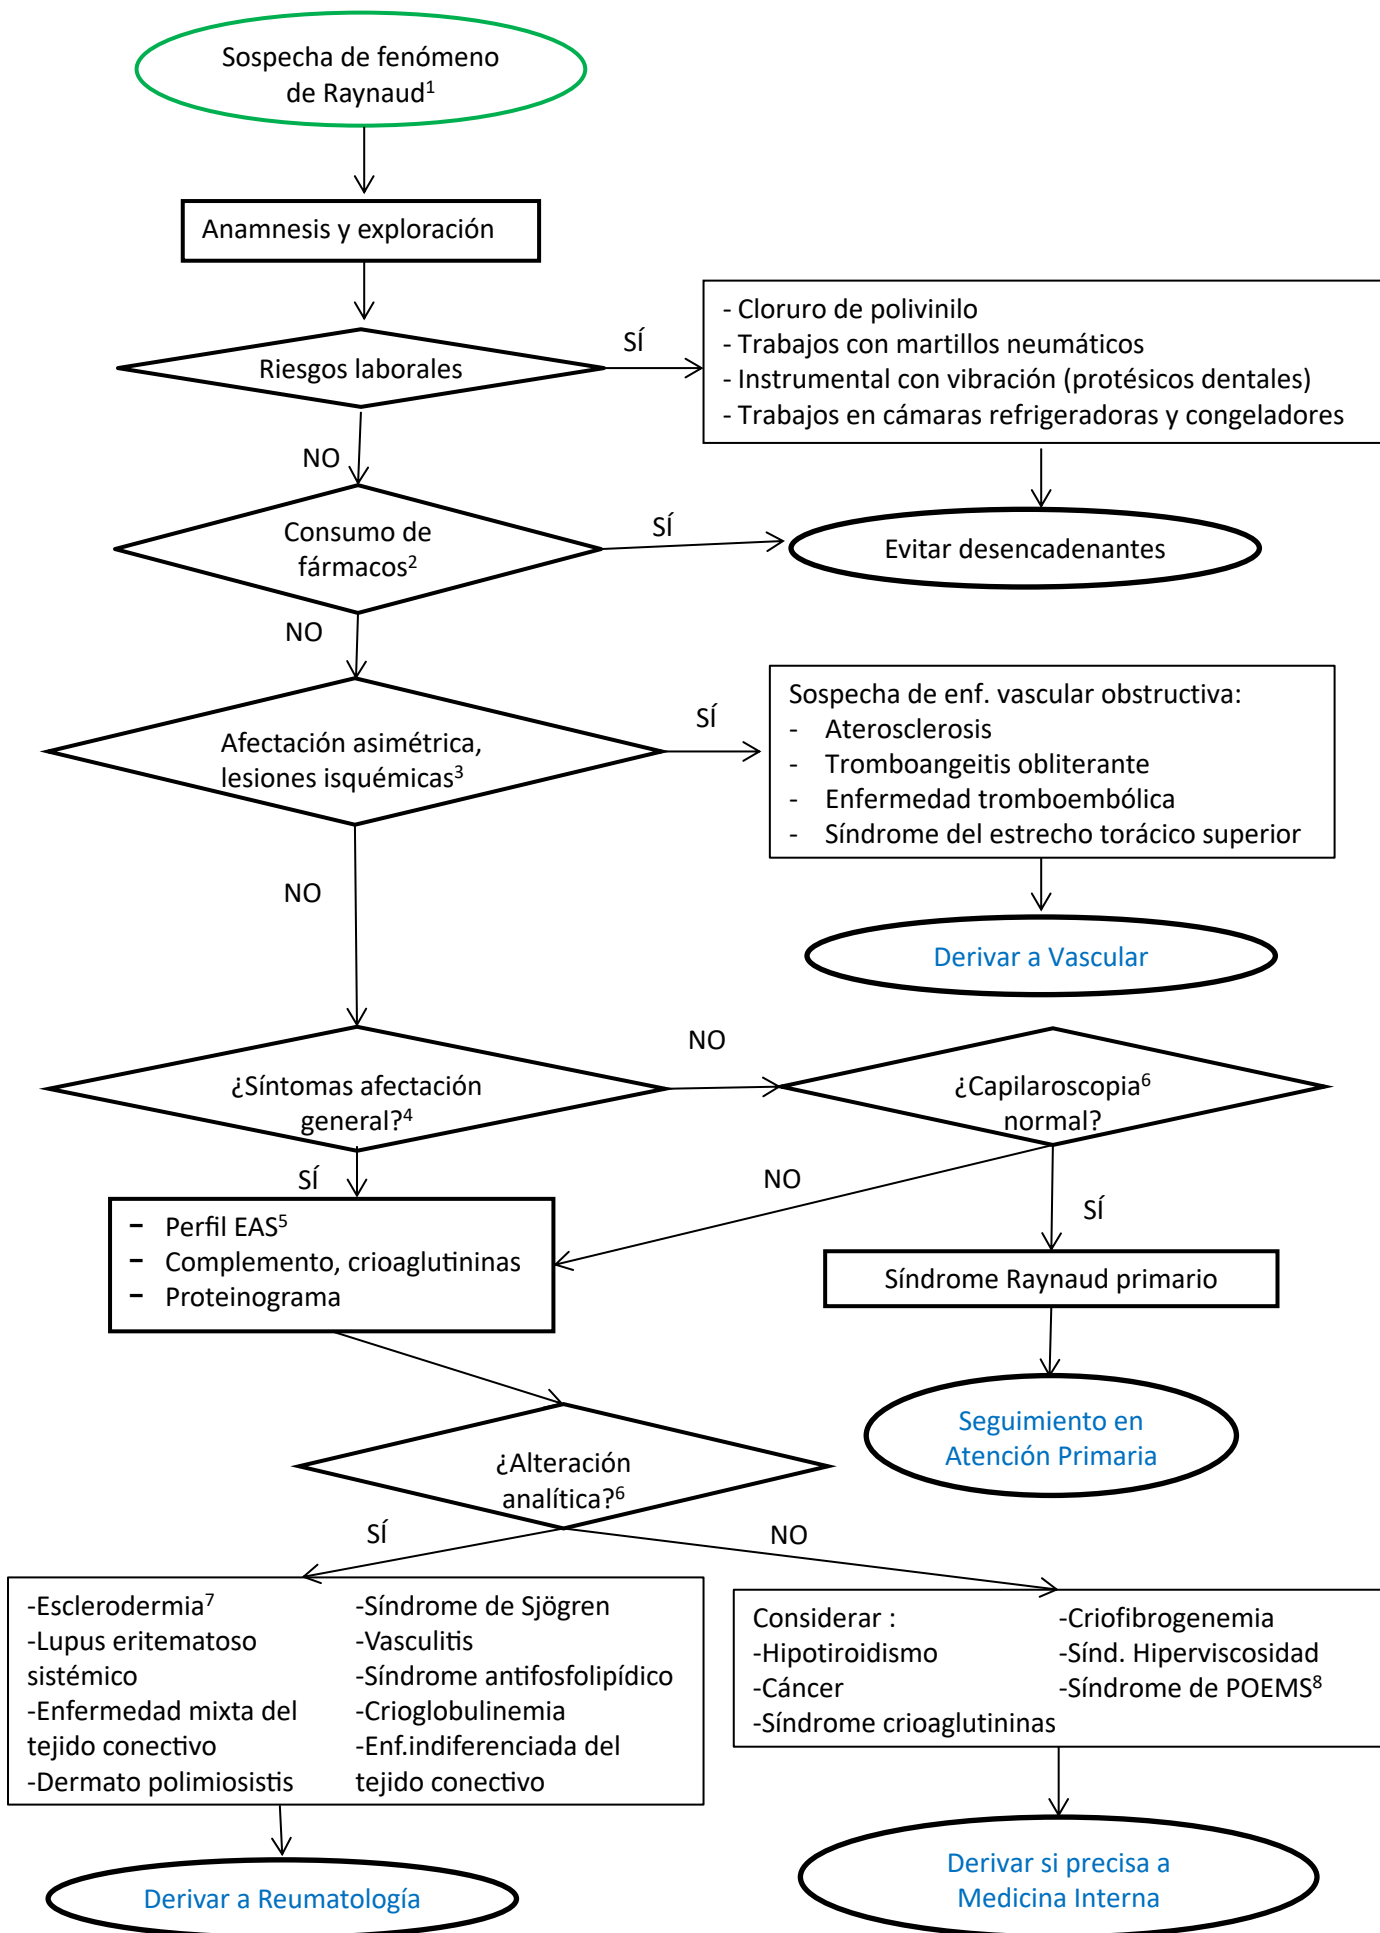

## NOTAS

1. Fenómenos de Raynaud (FR): sensibilidad extrema al frío de los dedos de las manos, que cambian de color con el frío (azul, blanco o ambos). Se trata de una isquemia intermitente de partes acras inducida por el frío y/o el estrés, afecta a un 2,8-3,4% de la población general. La mayoría presentarán formas primarias no asociadas a enfermedad sistémica, pero en ciertos casos será el debut de una enfermedad autoinmune sistémica y más concretamente de la esclerosis sistémica.
2. Fármacos de riesgo: ergotamina, interferón, clonidina, nicotina, estrógenos, narcóticos, simpaticomiméticos y beta bloqueantes no selectivos
3. La afectación solo un solo dedo, los síntomas asimétricos, ausencia de pulsos periféricos, asimetría de la tensión y las lesiones isquémicas distales son muy sugestivos de lesión vascular periférica. Confirmar con ecografía-Doppler arterial, angiografía o angiorresonancia.
4. Síntomas generales y síndrome constitucional: mialgias, artralgias, fiebre, debilidad, pérdida de peso, rash, artritis, síndrome seco, síntomas respiratorios o cardíacos.
5. Perfil EAS: análisis inicial habitualmente disponible en Atención Primaria para enfermedades autoinmunes, que incluye hemograma, bioquímica básica, velocidad de sedimentación, proteína C reactiva, anticuerpos antinucleares (ANA) y orina elemental.
6. La realización de una capilaroscopia y de unos ANA es imprescindible dado su alto valor predictivo de evolución hacia una esclerosis sistémica.
7. De las dos formas clásicas reconocidas de esclerosis sistémica (ES), el FR precede el comienzo de la misma en el 100% de las formas limitadas y en el 85-90% de las formas difusas.
8. POEMS: Polineuropatía, Organomegalia, Endocrinopatía, banda Monoclonal y lesiones cutáneas (Skin)

## BIBLIOGRAFÍA

Wigley FM, Flavahan NA. Raynaud's Phenomenon. N Engl J Med 2016; 375:556-65

Wigley FM, Boin F. Clinical Features and Treatment of Scleroderma. En Kelley & Firestein's Textbook of Rheumatology. 2017: 1424-60

Román Ivorra JA, González Perales JL, Fernández Carballido C, Graña J, Torres MJ. Prevalence of Raynaud's phenomenon in general practice in the east of Spain. Clin Rheumatol. 2001;20(2):88-90.



# ENFERMEDADES AUTOINMUNES SISTÉMICAS GUÍA PARA DERIVACIÓN EN ATENCIÓN PRIMARIA SER-SEMFYC

## TROMBOSIS VENOSA

Dra. María D. Medina Abellán

Sociedad Española de Medicina Familiar y Comunitaria (SEMFYC)

Especialista en Medicina Familiar y Comunitaria

Centro de Salud Espinardo. Murcia

Dr. José Andrés Román Ivorra

Sociedad Española de Reumatología (SER)

Especialista en Reumatología

Hospital Universitario y Politécnico La Fe. Valencia

## Trombosis venosa<sup>1</sup>

- Anamnesis y exploración
- Criterios Wells<sup>2</sup>
- Eco Doppler
- Dímero D

¿Trombosis superficial?

NO

¿Síntomas respiratorios?

NO

¿Afecta a miembros superiores?

NO

¿Presenta úlceras orales o genitales?

NO

¿Complicaciones obstétricas?<sup>5</sup>

NO

¿Localización atípica o afectación arterial y venosa?

NO

¿Presenta lupus o livedo reticularis?

NO

¿Recurrente?

SI

¿Asociado a catéter o inyección iv?

NO

Enf. Buerger

SI

Tromboembolismo pulmonar (TEP)<sup>3</sup>

SI

Trombosis venosa profunda (TVP) secundaria<sup>4</sup>

SI

Enf. Behçet

SI

SI

SI

SI

NO

Trombosis venosa profunda idiopática<sup>6</sup>

SI

Trombosis venosa superficial

Derivar a Vascular

Derivar a Urgencias

Derivar a Reumatología

Síndrome antifosfolípido

Derivar a Vascular

## NOTAS

1. Descartar cirugías, traumatismo, encamamiento, viaje de larga duración, enfermedades congénitas
2. Criterios Wells:
  - Diagnóstico alternativo menos probable que la TEP 3,0
  - Síntomas o signos de TVP 3,0
  - Antecedentes de TEP o TVP 1,5
  - Inmovilización de al menos 3 días o cirugía en el último mes 1,5
  - Frecuencia cardíaca > 100/min 1,5
  - Hemoptisis 1,0
  - Cáncer en tratamiento activo o paliativo en los últimos 6 m. 1,0

Interpretación para dímero D muy sensible (variable según el método de determinación)

- Probabilidad baja: < 2 puntos
- Probabilidad intermedia: 2-6 puntos
- Probabilidad alta: ≥ 6 puntos

Interpretación para dímero D menos sensible

- TEP probable: > 4 puntos
- TEP poco probable: ≤ 4 puntos

3. Tromboembolismo pulmonar (TEP): disnea, taquipnea, dolor torácico, taquicardia, fiebre.
4. Trombosis venosa profundas (TVP) de miembros superiores secundarias: suponen el 77% de todas las de miembros superiores asociadas a empleo catéter, marcapasos, neoplasias.
5. Complicaciones obstétricas: ≥ 3 abortos < 10 semanas de gestación, pre-eclampsia, eclampsia.
6. En este caso es necesario descartar cáncer oculto.

## BIBLIOGRAFÍA

Enfermedades autoinmunes sistémicas. Guías clínica de síntomas y signos en atención primaria. SEMI y SEMFYC; 2014. <https://www.Semfyc.es/wp-content/uploads/2016/05/guia-autoinmunes-semi-semfyc.pdf>

Mendioroz Vallespín L, Sanz Pérez I. Enfermedades autoinmunes sistémicas en atención primaria. Actualizaciones. FMC, 2016; 23 (9): 513-27.

Guía clínica de síndrome de Behçet. Guías clínicas Fisterra. Última revisión: 19/11/2010. Consultada el 25/01/2017.

Guía clínica de síndrome antifosfolipídico. Guías clínicas Fisterra. Fecha de la última revisión: 15/12/2015. Consultada el 25/01/2017.

Graña Gil J. Síndrome de Behçet y otras vasculitis. Sección 9. Capítulo 53. Manual SER de enfermedades reumáticas: 6ª edición. Elsevier; 2014. p 427-436.

Tejón Menéndez P, Pego Riegosa JM. Síndrome antifosfolipídico. Sección 8. Capítulo 44. Manual SER de enfermedades reumáticas: 6ª edición. Elsevier; 2014. p 349-54.

Uresandi F, Monreal M, García-Bragado F, Domenech P, Lecumberri R, Escribano P et al. Consenso nacional sobre el diagnóstico, estratificación del riesgo y tratamiento de los pacientes con tromboembolismo pulmonar. Arch Bronconeumol. 2013; 49:534-47

# ENFERMEDADES AUTOINMUNES SISTÉMICAS GUÍA PARA DERIVACIÓN EN ATENCIÓN PRIMARIA SER-SEMFYC

## ISQUEMIA ARTERIAL

Dra. María D. Medina Abellán

Sociedad Española de Medicina Familiar y Comunitaria (SEMFYC)

Especialista en Medicina Familiar y Comunitaria

Centro de Salud Espinardo. Murcia

Dr. José Andrés Román Ivorra

Sociedad Española de Reumatología (SER)

Especialista en Reumatología

Hospital Universitario y Politécnico La Fe. Valencia

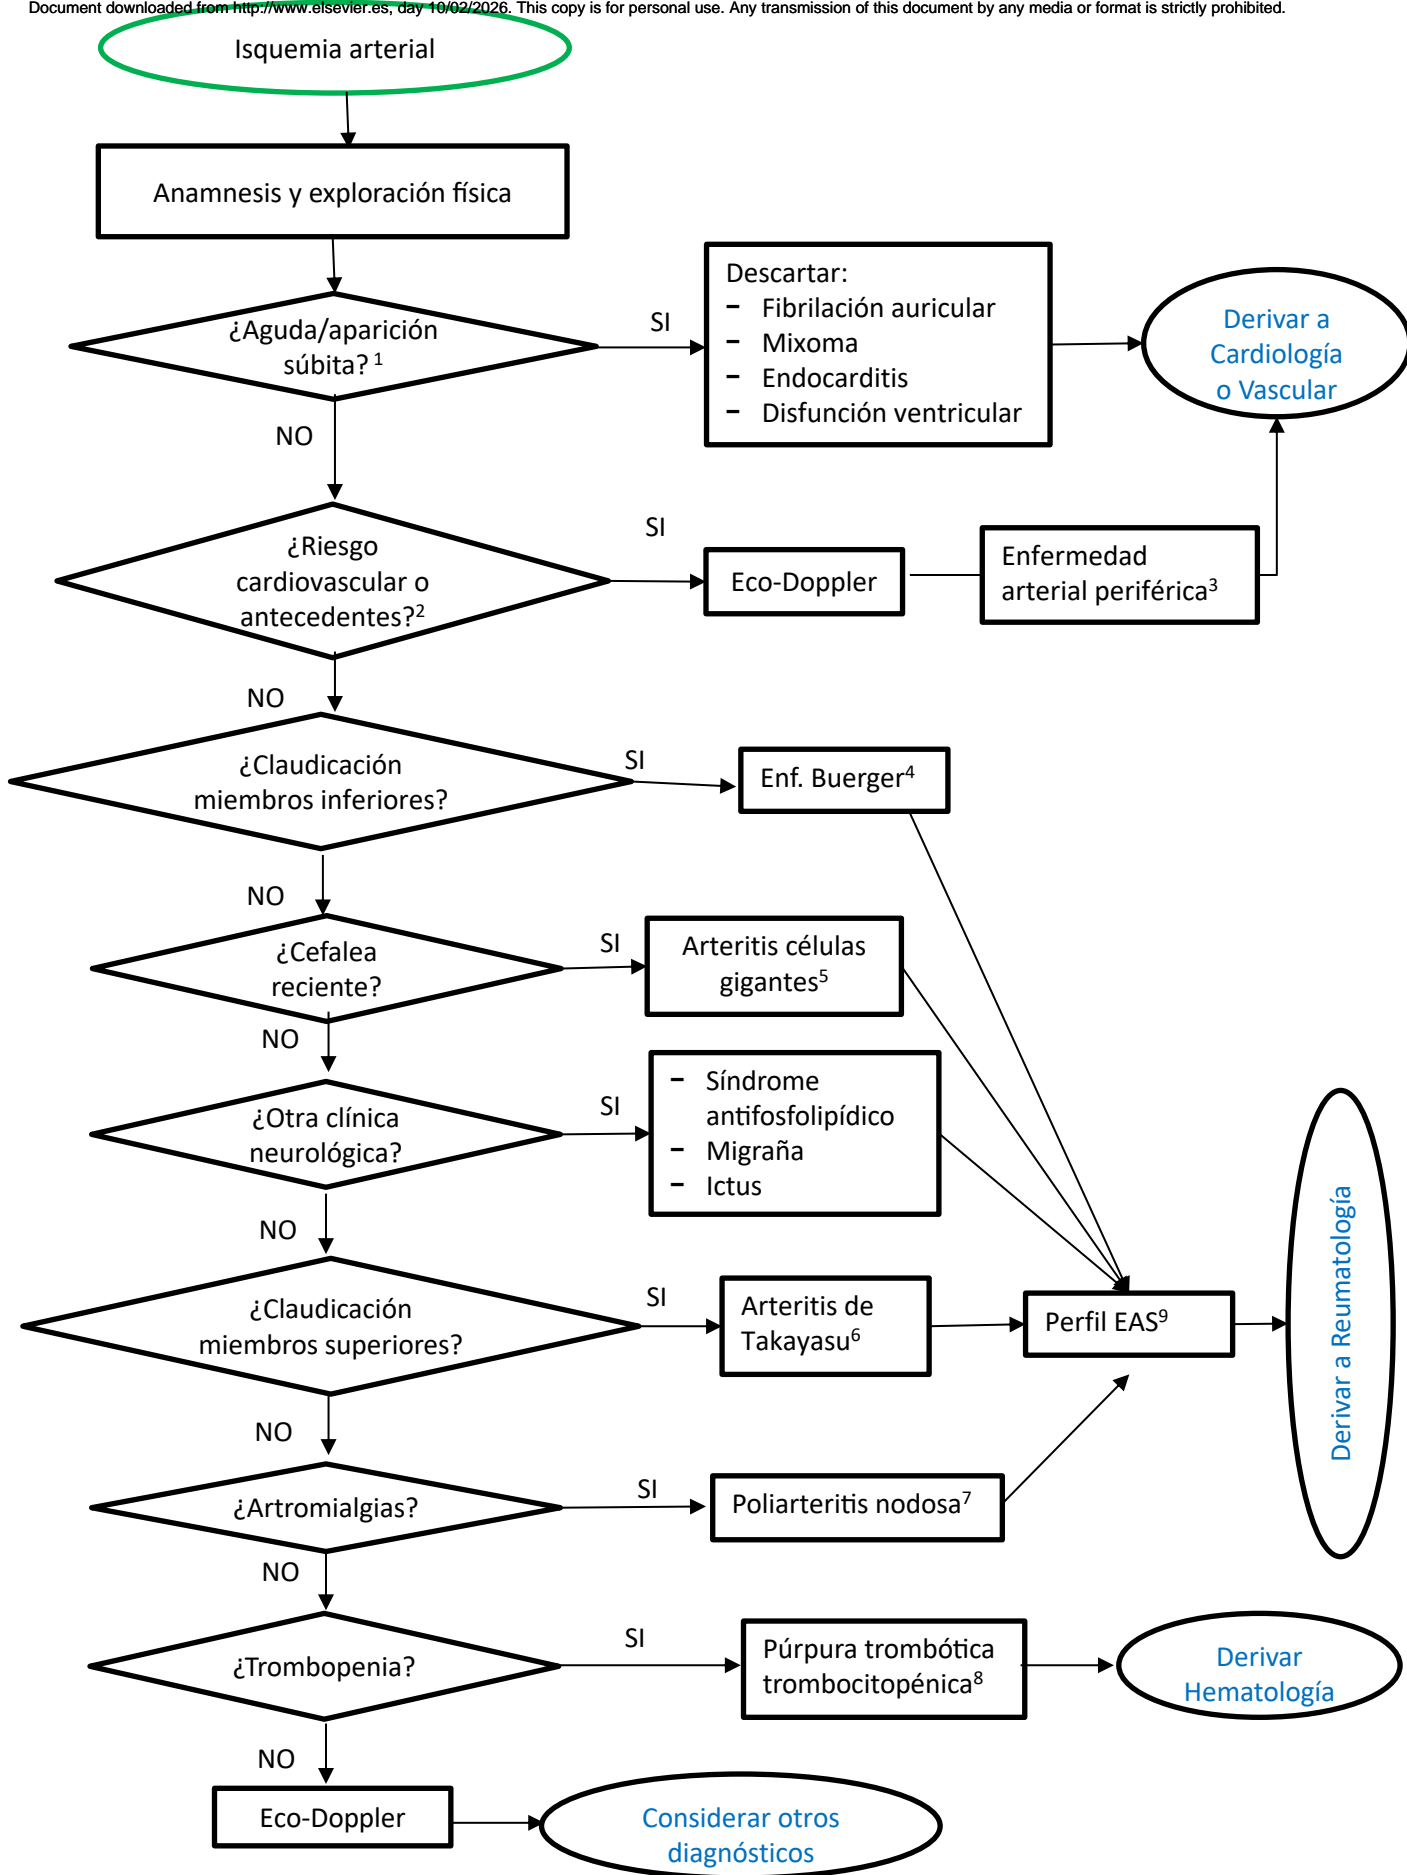

## NOTAS

1. El origen de la isquemia puede ser embólico desde un foco cardiogénico o una trombosis arterial aguda en pacientes con enfermedad arterioesclerótica.
2. Riesgo cardiovascular alto asociado a la presencia de factores de riesgo no modificables (edad, género, genética) y modificables (tabaco, diabetes, hipertensión arterial o dislipemias).
3. Se produce una disminución lenta y progresiva del flujo sanguíneo. Se produce dolor localizado frecuentemente en la pantorrilla, es progresivo y desaparece con el reposo.
4. Enfermedad de Buerger o tromboflebitis superficial migratoria de vasos superficiales. Las manifestaciones clínicas más frecuentes son la isquemia de la extremidad, la claudicación intermitente y la tromboflebitis. Más frecuente en fumadores.
5. Sospecha de arteritis de células gigantes (ACG) ante una cefalea brusca de reciente aparición, temporal u occipital, en un paciente >50 años que presente además manifestaciones craneales típicas (claudicación mandibular o de lengua, hiperestesia del cuero cabelludo a la palpación, arteria temporal superficial tortuosa, dolorosa, inflamada o sin pulso), alteraciones visuales (diplopía, pérdida súbita de visión o *amaurosis fugax*), síndrome constitucional (fiebre, astenia, anorexia, pérdida de peso) o polimialgia reumática (PMR) acompañante (dolor nocturno con intensa rigidez matutina en la cintura escapular y/o pelviana).
6. Arteritis de Takayasu. Enfermedad más frecuente en mujeres que se manifiesta antes de los 40 años. Tres estadios evolutivos: sintomatología constitucional, inflamación del vaso, lesiones vasculares establecidas. La forma de presentación más frecuente es la claudicación de miembros, sobre todo extremidades superiores. Otras manifestaciones: fenómeno de Raynaud, palidez distal y úlceras isquémicas.
7. Poliarteritis nodosa: su forma sistémica suele iniciarse de forma inespecífica con síntomas generales y artromialgias, añadiéndose después la sintomatología vasculítica. Se produce una neuropatía periférica en la que los síntomas sensitivos suelen preceder a los motores.
8. Púrpura trombótica trombocitopénica: anemia hemolítica microangiopatía + trombopenia.
9. Perfil EAS: análisis inicial habitualmente disponible en Atención Primaria para enfermedades autoinmunes, que incluye hemograma, bioquímica básica, velocidad de sedimentación, proteína C reactiva, anticuerpos antinucleares (ANA) y orina elemental.

## BIBLIOGRAFÍA

Buitrago Ramírez F, Pérez Caballero FL. Arteriopatía periférica. FMC. 2013; 20(5):246-255.

González-Gay Mantecón MA, Rueda Gotor J. Arteritis de células gigantes. Polimialgia reumática. Arteritis de Takayasu. Sección 7. Capítulo 50. Manual SER de enfermedades reumáticas: 6ª edición. Elsevier; 2014. p. 397-408.

Blanco Alonso, R; Pina Murcia, T. Vasculitis de vaso mediano y pequeño por inmunocomplejos. Sección 7. Capítulo 51. Manual SER de enfermedades reumáticas: 6ª edición. Elsevier; 2014. p 409-16.

# ENFERMEDADES AUTOINMUNES SISTÉMICAS

## GUÍA PARA DERIVACIÓN EN ATENCIÓN PRIMARIA

### SER-SEMFYC

## UVEÍTIS

Dr. Ricardo Blanco Vela

Sociedad Española de Reumatología (SER)

Especialista en Reumatología

Hospital Universitario Marqués de Valdecilla. Santander

Dr. Álvaro Pérez Martín

Sociedad Española de Medicina Familiar y Comunitaria (SEMFYC)

Especialista en Medicina Familiar y Comunitaria

Centro de Salud Centro. Santander

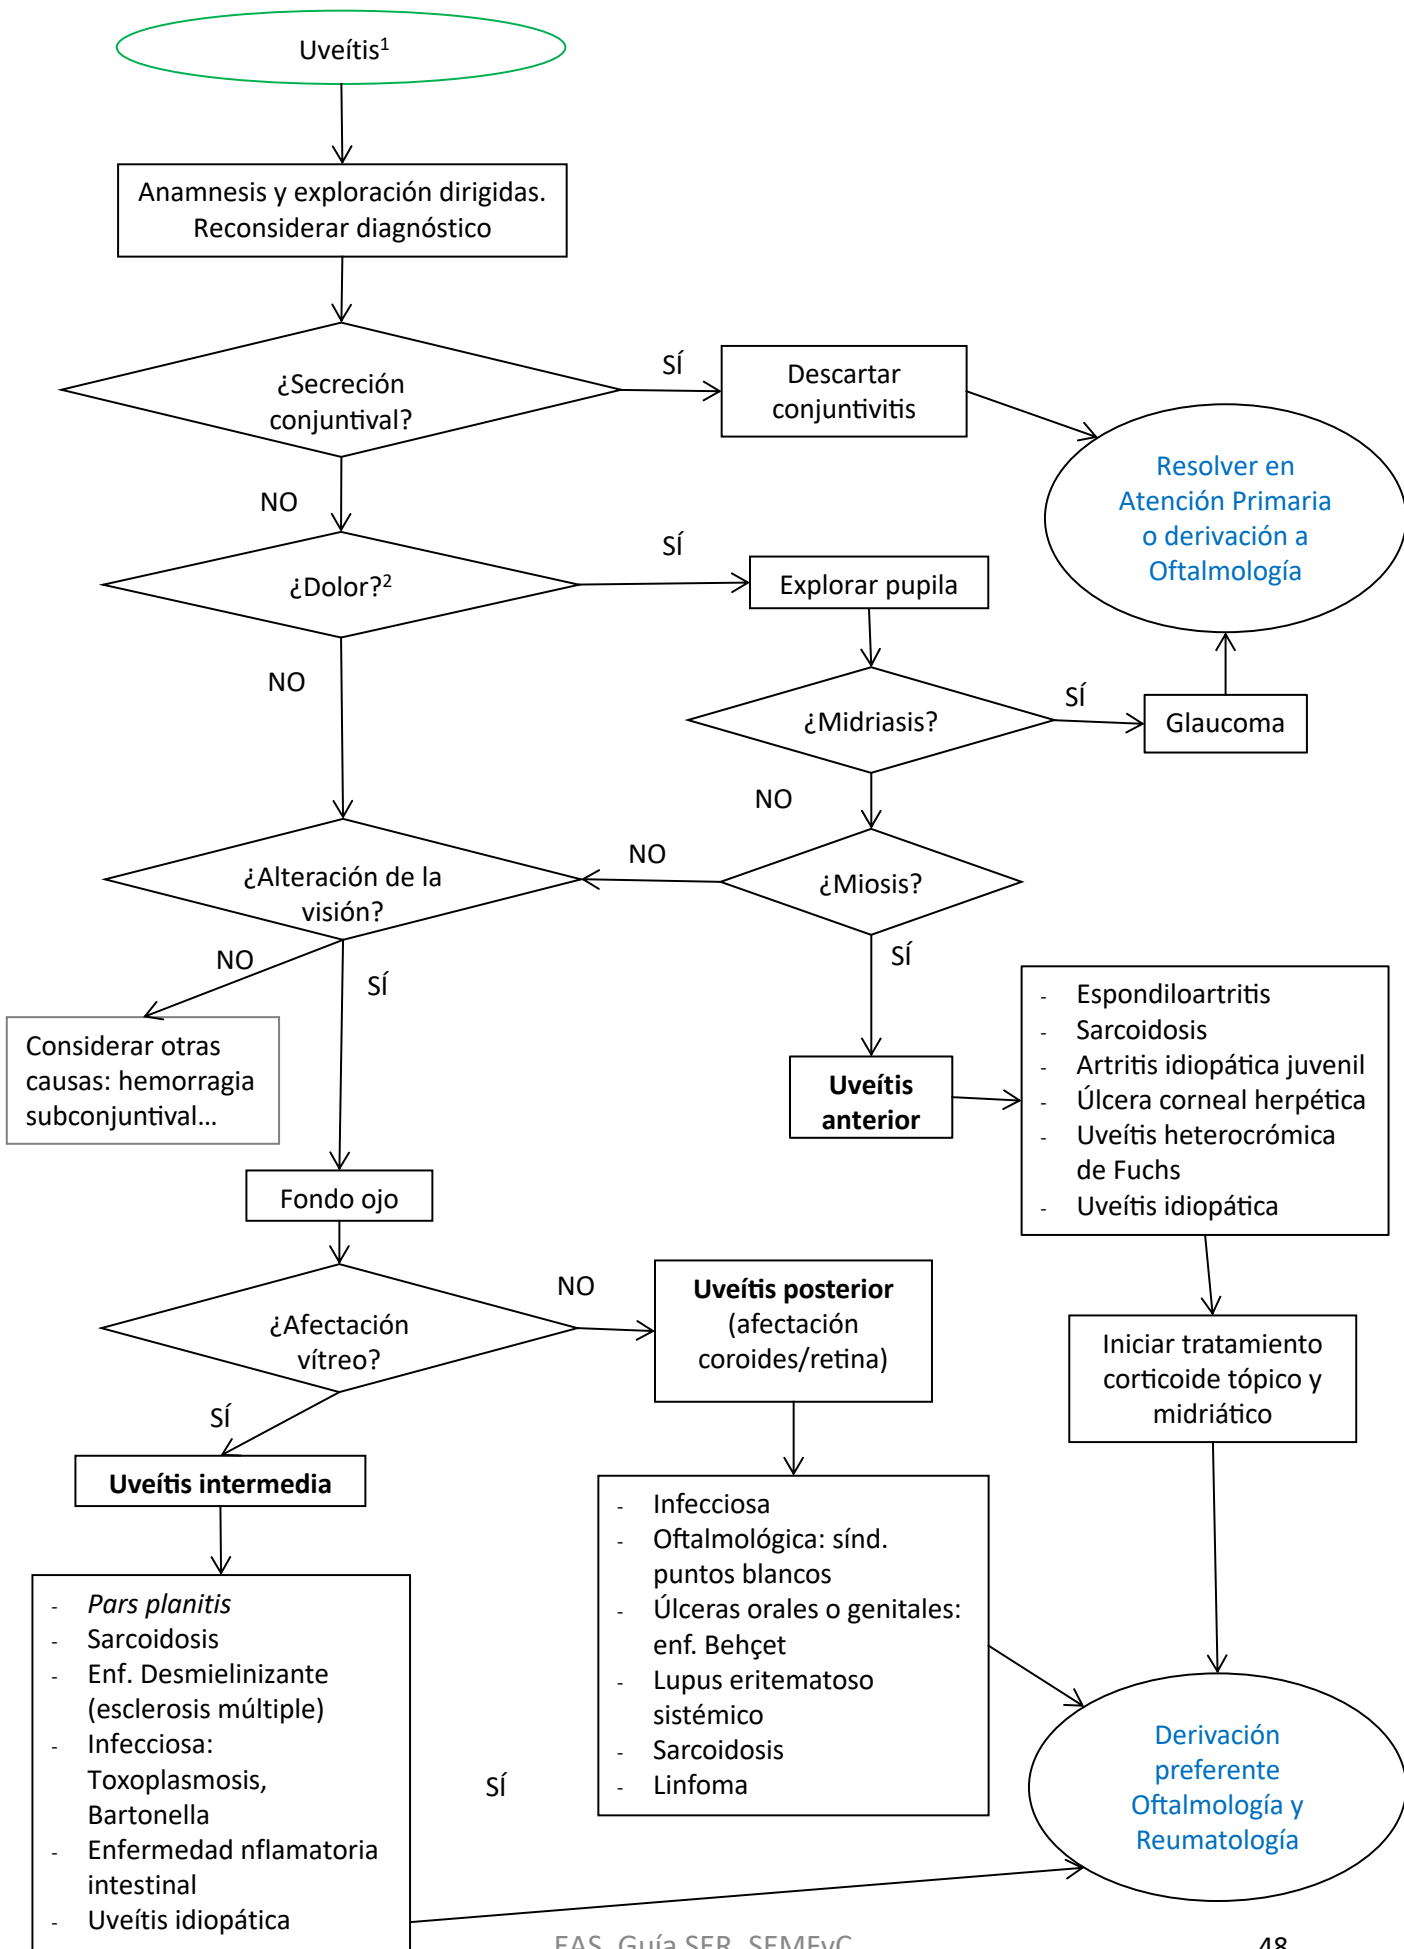



## NOTAS

1. La uveítis se caracteriza por la inflamación de la úvea. En su parte anterior se compone por iris y cuerpo ciliar y en su parte posterior por la coroides. La uveítis anterior cursa con ojo rojo al igual que la panuveítis y se acompaña de dolor. La uveítis posterior cursa con miodesopsias, visión borrosa o escotomas, sin ojo rojo ni dolor necesariamente. Otro escenario de ojo tranquilo sin dolor ni hiperemia es la uveítis anterior de la artritis idiopática juvenil, donde las inflamaciones oculares silentes son frecuentes.

## BIBLIOGRAFÍA

Hernández-García C et al. Aproximación diagnóstica al paciente con inflamación ocular. *Rev Esp Reumatol* 1997; 24: 168-178

Jabs DA, Nussenblatt RB, Rosenbaum JT, Standardization of Uveitis Nomenclature (SUN) Working Group. Standardization of uveitis nomenclature for reporting clinical data. Results of the First International Workshop. *Am J Ophthalmol* [Internet]. 2005; 140(3):509–16.

# ENFERMEDADES AUTOINMUNES SISTÉMICAS GUÍA PARA DERIVACIÓN EN ATENCIÓN PRIMARIA SER-SEMFYC

## OJO SECO

Dr. Álvaro Pérez Martín

Sociedad Española de Medicina Familiar y Comunitaria (SEMFYC)

Especialista en Medicina Familiar y Comunitaria

Centro de Salud Centro. Santander

Dr. Ricardo Blanco Vela

Sociedad Española de Reumatología (SER)

Especialista en Reumatología

Hospital Universitario Marqués de Valdecilla. Santander

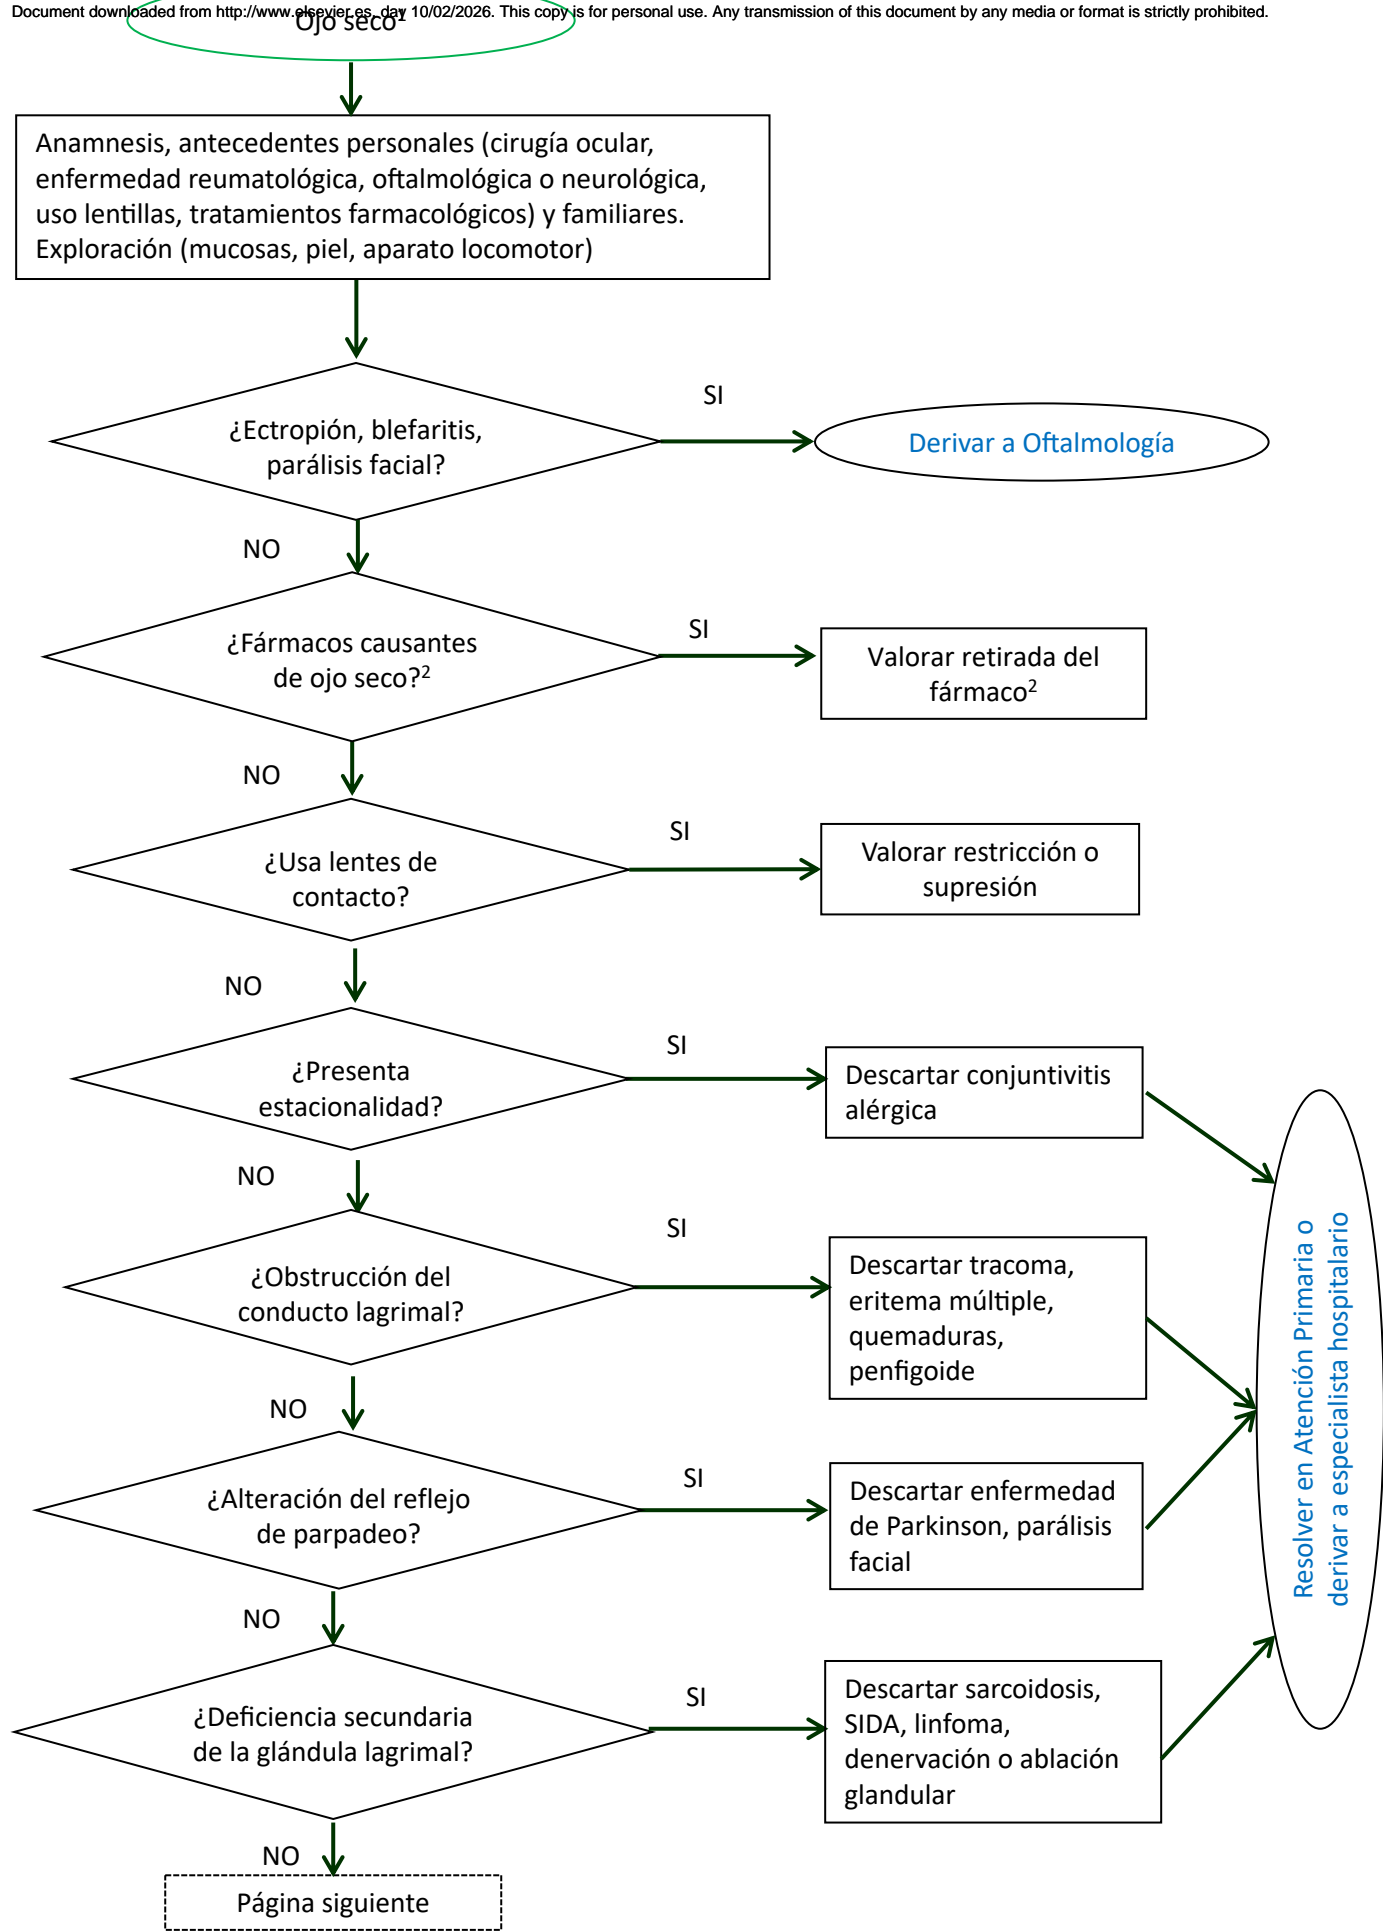

Viene de página anterior

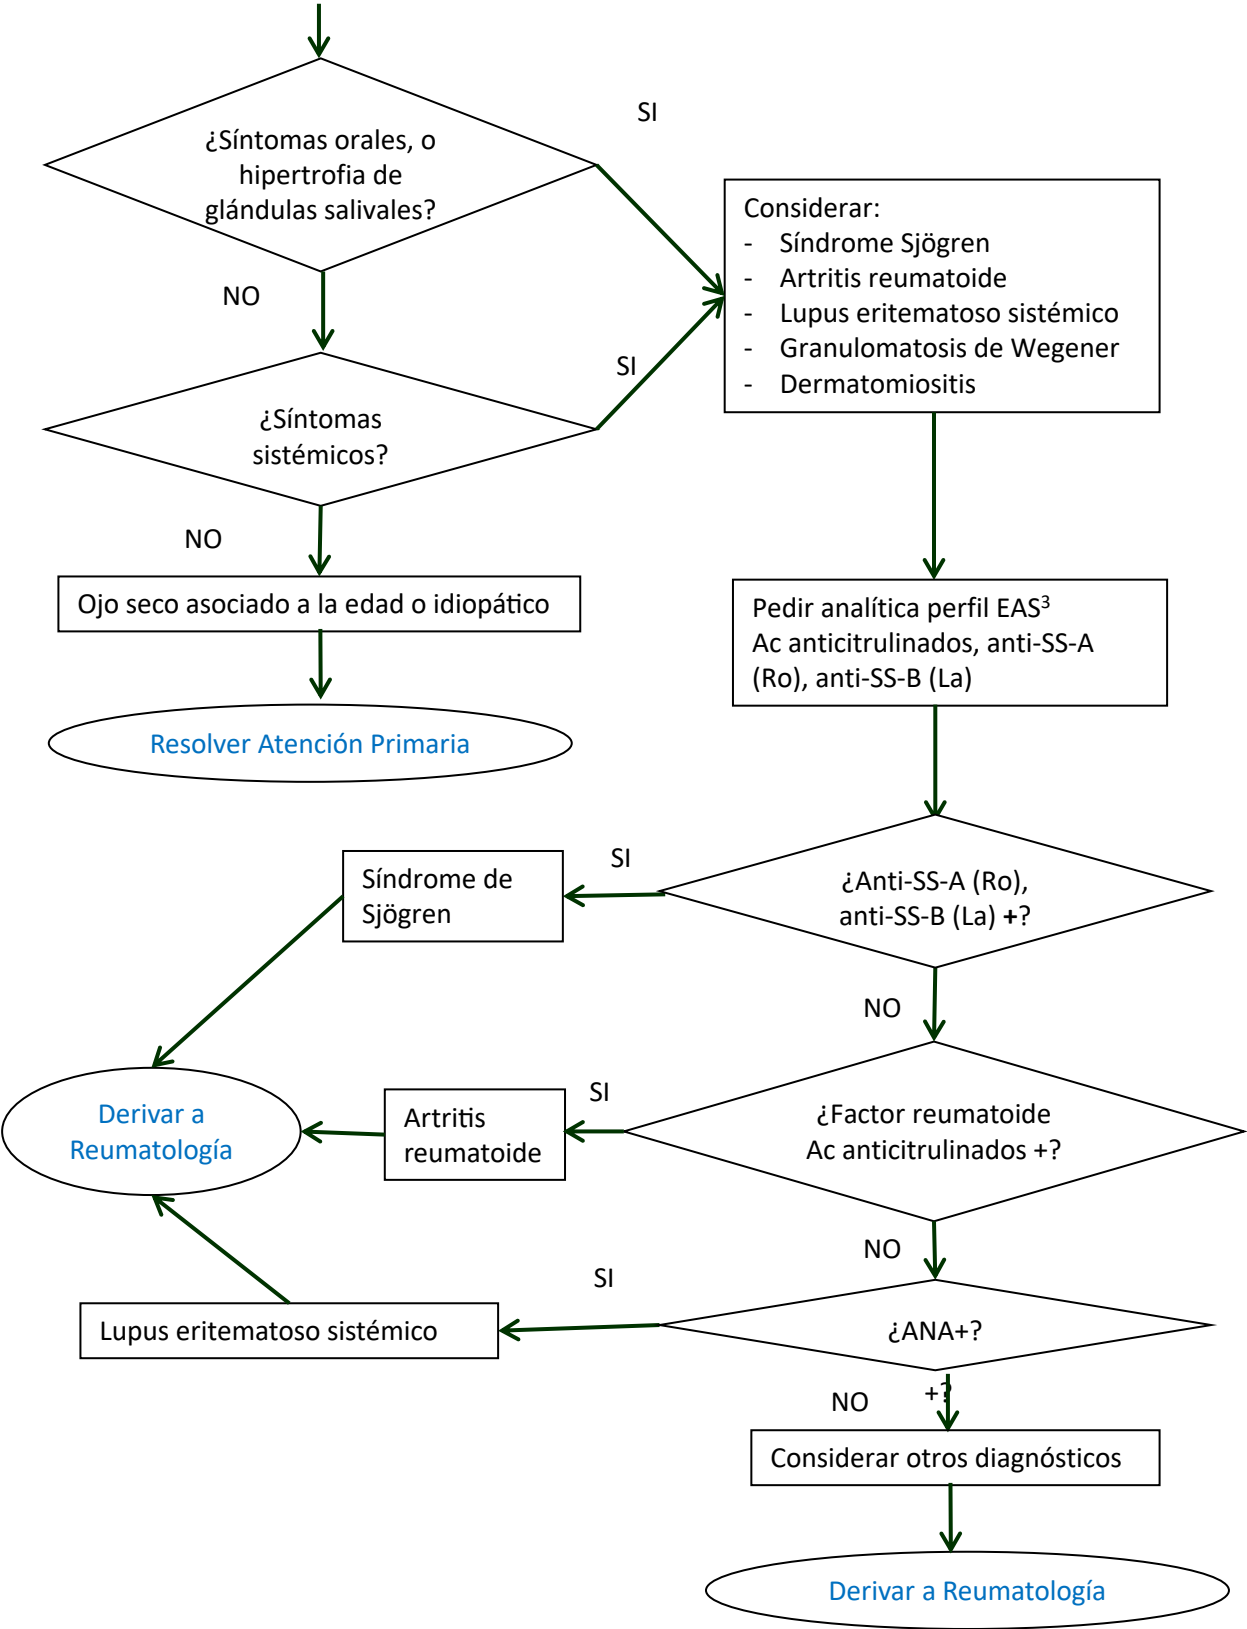

## NOTAS

1. Ojo seco: sensación subjetiva de sequedad ocular o cuerpo extraño sin que se objeque ninguno
2. Fármacos sospechosos de ojo seco: sobre todo los que tienen efectos anticolinérgicos, ver Tabla 1
3. Perfil EAS: análisis inicial habitualmente disponible en Atención Primaria para enfermedades autoinmunes, que incluye hemograma, bioquímica básica, velocidad de sedimentación, proteína C reactiva, anticuerpos antinucleares (ANA) y orina elemental.

## BIBLIOGRAFÍA

Romero conde A, Tejón Ruiz M. Ojo seco. Ojo lloroso. En: Guía de actuación en Atención Primaria. 4ª ed. Barcelona: Semfyc ediciones, 2011; 1141-1148

Pérez Martín A, López Lanza JR. Síndrome Seco. AMF 2008;4(3):148-155

Cañada Millán. Ojo seco. AMF 2010;6(1):36-41

Tabla 1. Fármacos xerogénicos

- Antihistamínicos
- Anticomiciales
- Antidepresivos, sales de litio
- Antipsicóticos
- Ansiolíticos y sedantes
- Antihipertensivos
- Diuréticos
- Antiparkinsonianos
- Antiarrítmicos
- Anticolinérgicos
- Opioides
- Otros: isoniazida, antirretrovirales

# ENFERMEDADES AUTOINMUNES SISTÉMICAS GUÍA PARA DERIVACIÓN EN ATENCIÓN PRIMARIA SER-SEMFYC

## EPIESCLERITIS

Dr. Fernando León Vázquez

Sociedad Española de Medicina Familiar y Comunitaria (SEMFYC)

Especialista en Medicina Familiar y Comunitaria

Centro de Salud San Juan de la Cruz. Pozuelo de Alarcón (Madrid)

Dra. Ana Urruticoechea-Arana

Sociedad Española de Reumatología (SER)

Especialista en Reumatología

Hospital Can Misses. Ibiza

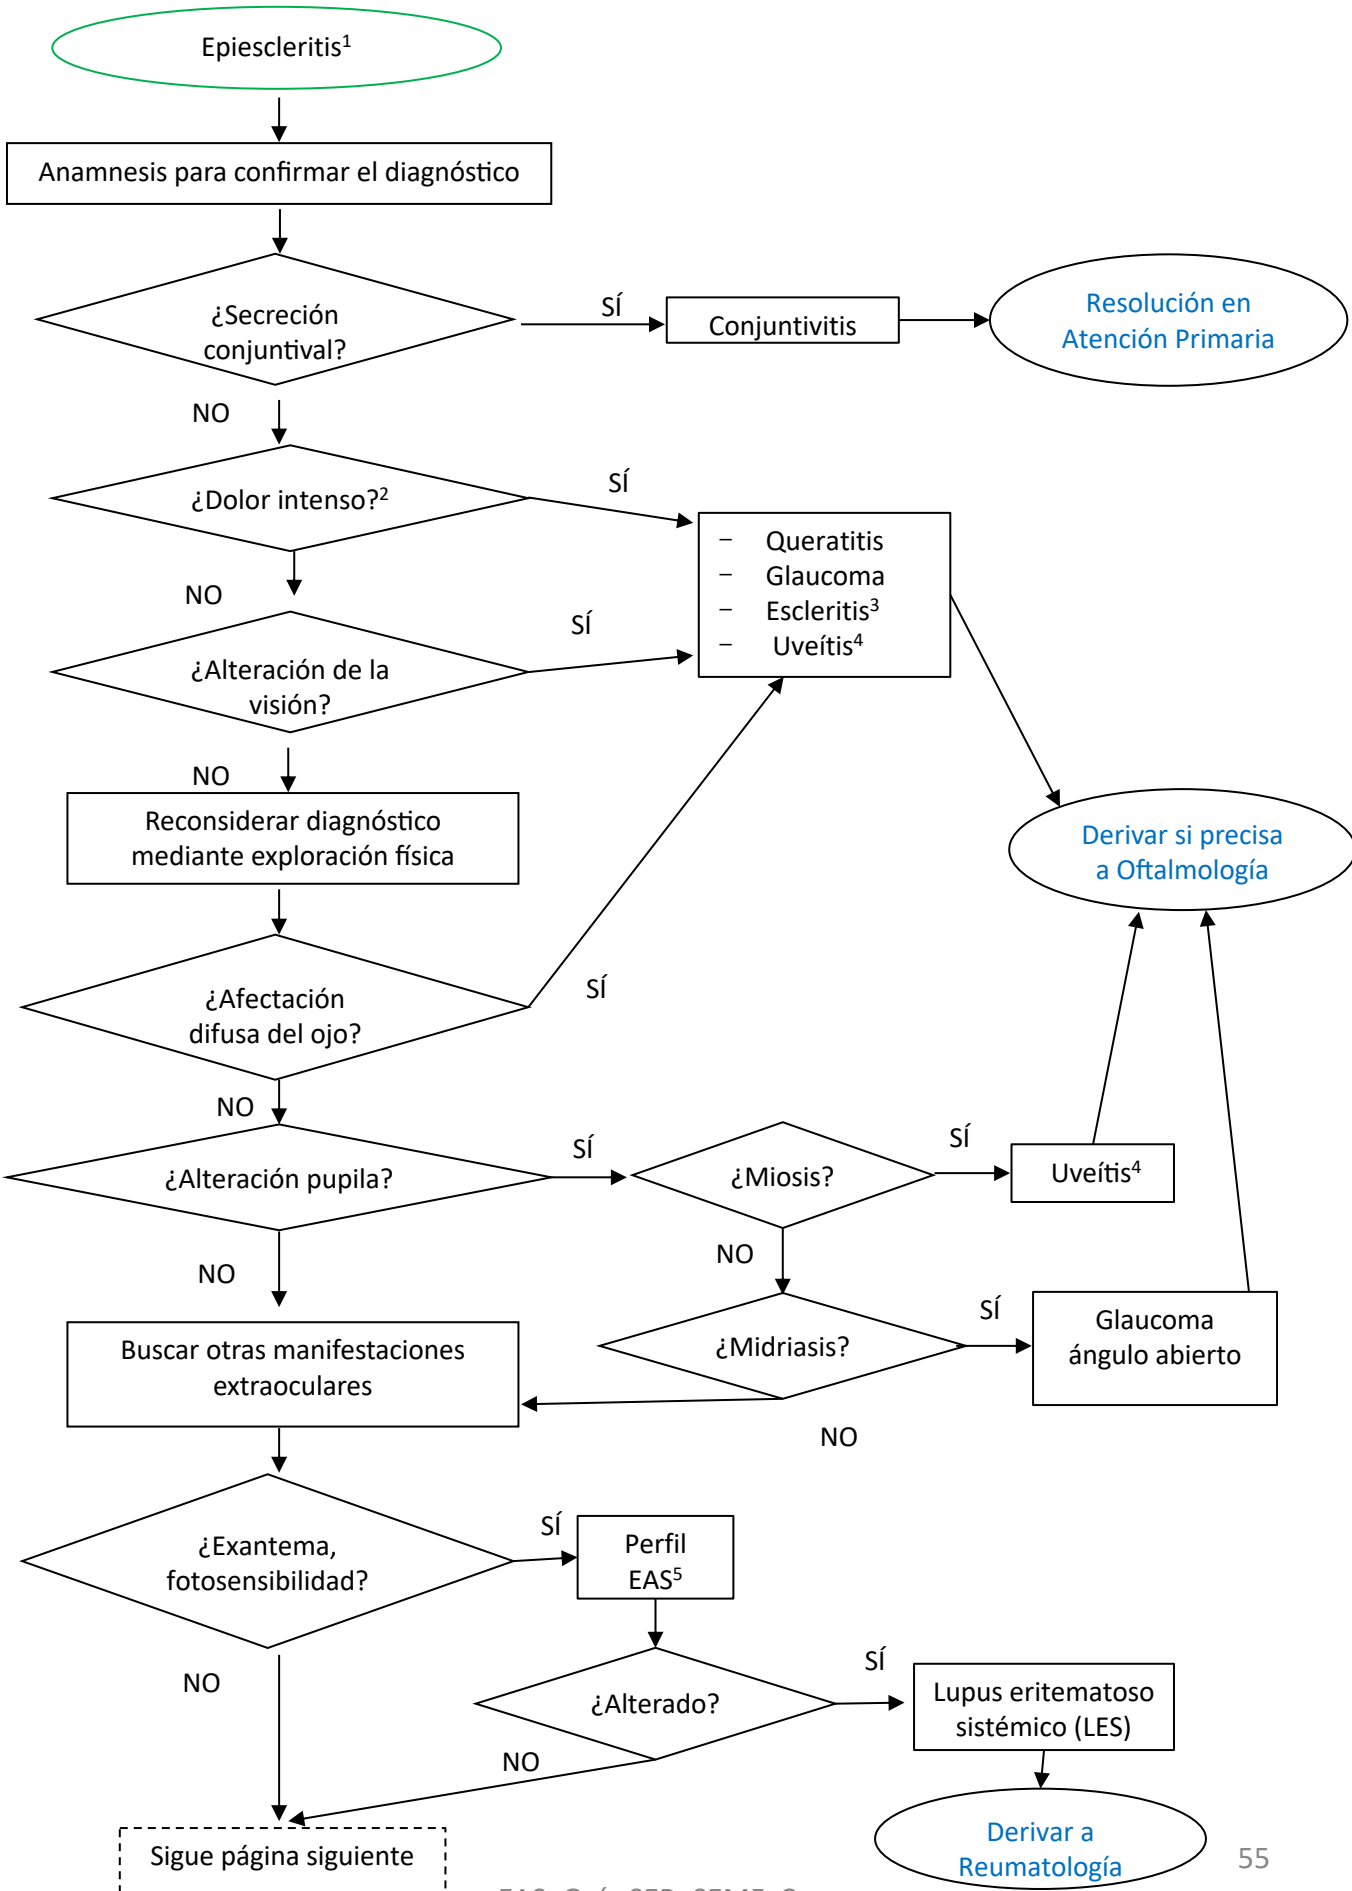

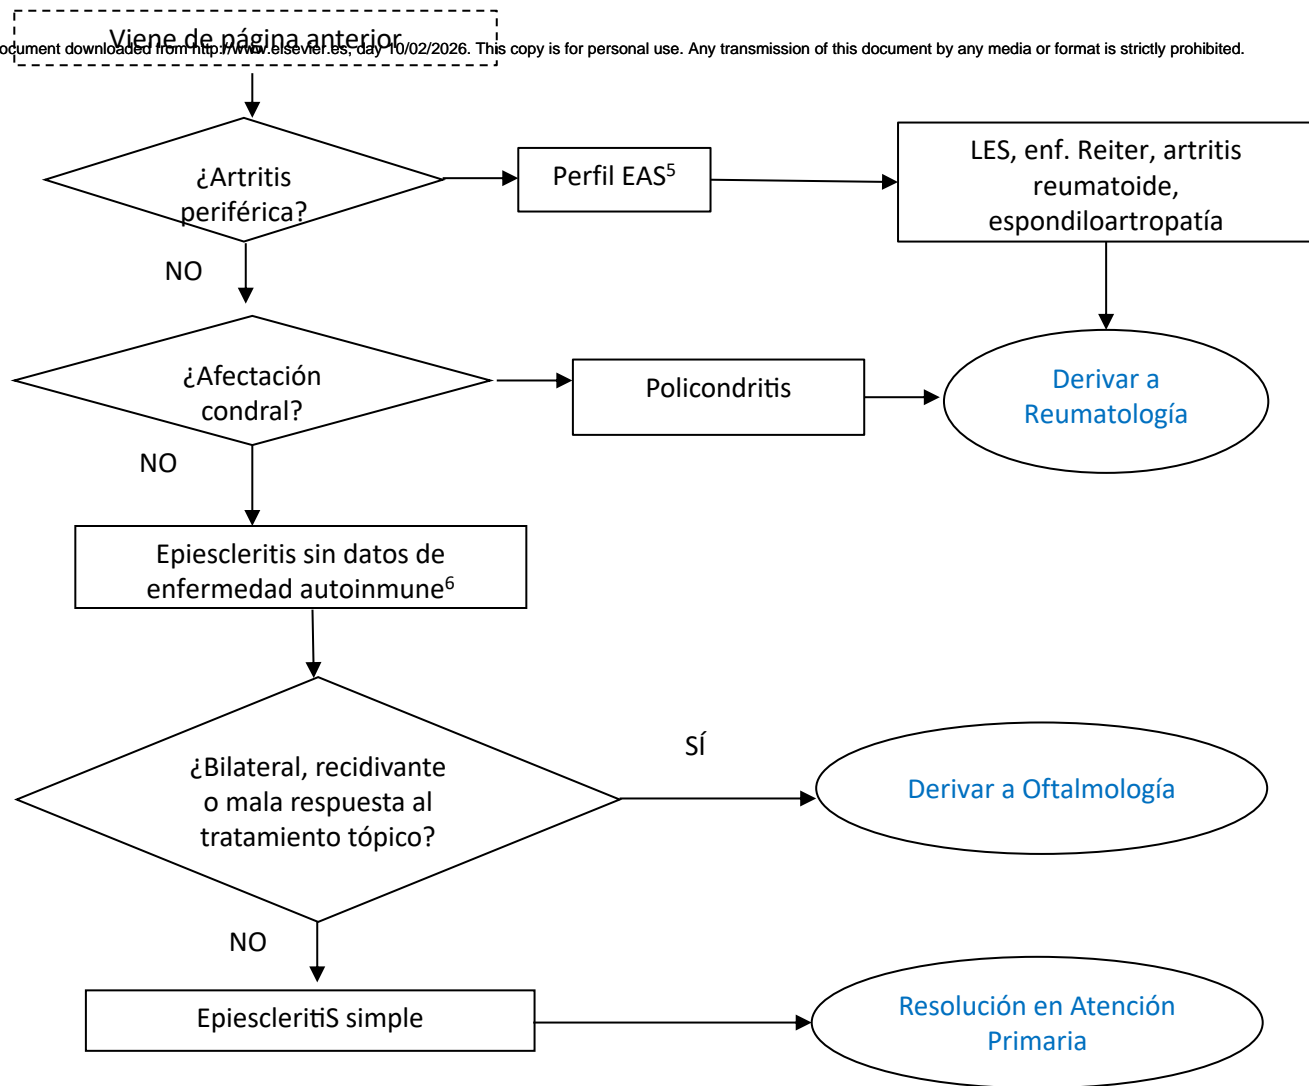

## NOTAS

1. La episcleritis se caracteriza por irritación o hiperemia del polo anterior del ojo afectando a la conjuntiva bulbar (respetando la palpebral), córnea, esclera, iris o cuerpo ciliar. Ante un ojo rojo moderadamente doloroso, sin fotofobia ni afectación pupilar, con alteración leve de la visión y sin secreción que sugiera conjuntivitis en una persona joven (más a menudo mujer) podemos sospechar episcleritis.
2. El dolor en la episcleritis es leve o no existe. En caso de dolor intenso, sospechar otra patología como la escleritis (a veces también asociado a patología reumática autoinmune), queratitis o glaucoma, o uveítis
3. La episcleritis se diferencia de la escleritis en que la primera afecta a personas más jóvenes, es más leve, alcanza solo a algún sector del globo ocular, apenas duele y la visión no está afectada.
4. Consultar algoritmo específico de uveítis
5. Perfil EAS: análisis inicial habitualmente disponible en Atención Primaria para enfermedades autoinmunes, que incluye hemograma, bioquímica básica, velocidad de sedimentación, proteína C reactiva, anticuerpos antinucleares (ANA) y orina elemental.
6. Alrededor de un tercio de las episcleritis se asocian a patología reumática, la mayoría son por tanto esporádicas y circunscritas al ojo. Estaremos más atentos en caso recidivantes, bilaterales y con mala respuesta al tratamiento

## BIBLIOGRAFÍA

Ramos Casals M, Sisó Almirall A. Guía Clínica Enfermedades Autoinmunes Sistémicas SEMI—semFYC 2014. <https://www.semfyc.es/wp-content/uploads/2016/05/guia-autoinmunes-semi-semfyc.pdf>

O'Day DM, Horn JD. El ojo y la enfermedad reumática. En: Harris DE, Budd RC, Firestein GS, Genovese MC, Sergen JS, Ruddy S, Sledge CB (Eds). Kelley Tratado de Reumatología. Elsevier. Madrid, 2006: 657-664.



# ENFERMEDADES AUTOINMUNES SISTÉMICAS GUÍA PARA DERIVACIÓN EN ATENCIÓN PRIMARIA SER-SEMFYC

## CEFALEA / ARTERITIS DE CÉLULAS GIGANTES

Dr. Juan Carlos Hermosa Hernán

Sociedad Española de Medicina Familiar y Comunitaria (SEMFYC)

Especialista en Medicina Familiar y Comunitaria

Centro de Salud Ciudades. Getafe (Madrid)

Dr. Santiago Muñoz Fernández

Sociedad Española de Reumatología (SER)

Especialista en Reumatología

Hospital Infanta Sofía. San Sebastián de los Reyes (Madrid)

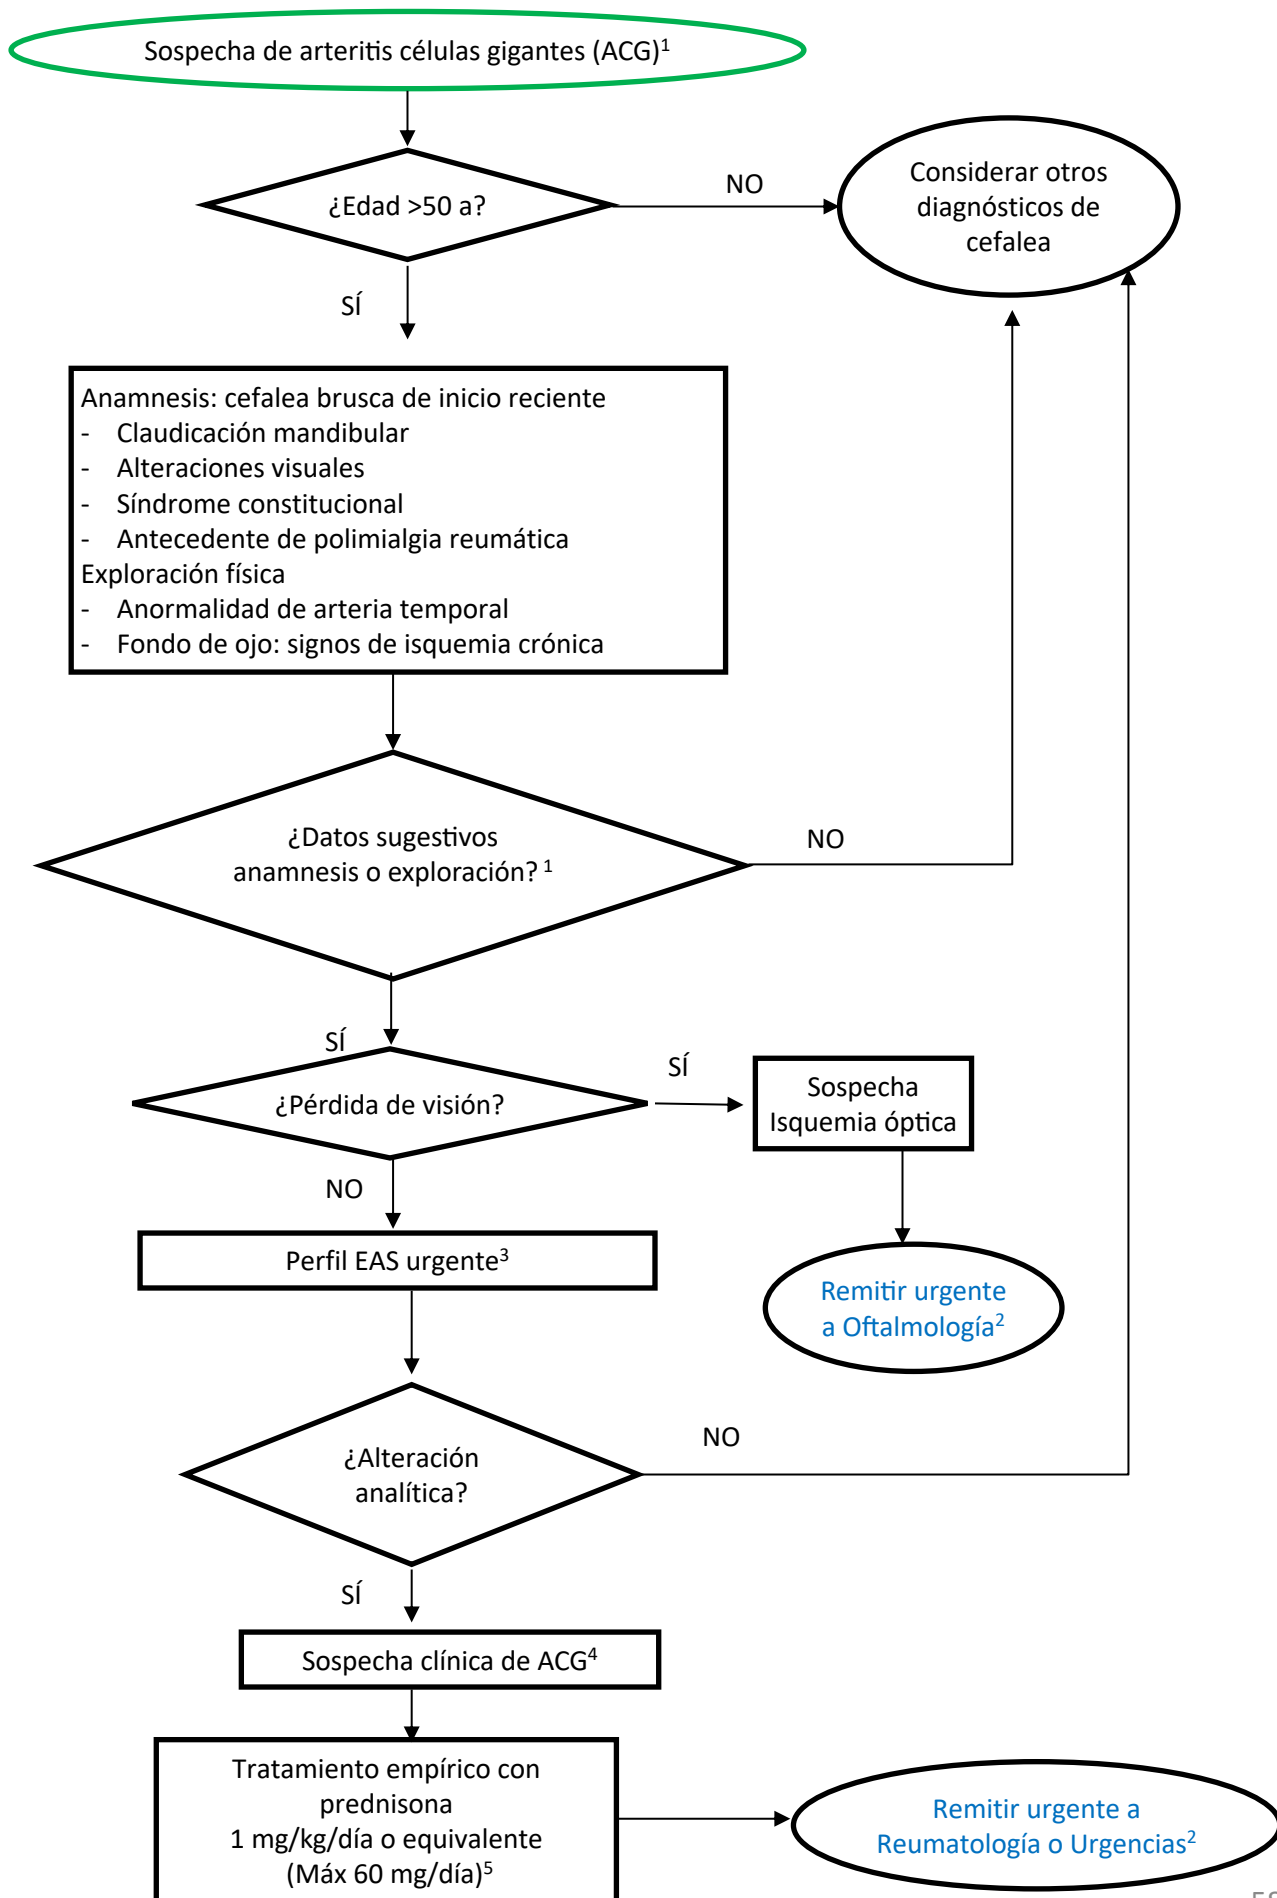

## NOTAS

1. Sospecha de arteritis de células gigantes (ACG): ante una cefalea brusca en un paciente >50 años sin antecedentes de cefalea que presente además
  - Manifestaciones craneales típicas:
    - Cefalea intensa no presente previamente, típicamente temporal u occipital (70-90%).
    - Claudicación mandibular o de lengua: cansancio de la mandíbula al masticar la comida que le obliga a detenerse (<50%).
    - Hiperestesia del cuero cabelludo a la palpación (<50%)
    - Arteria temporal superficial tortuosa, dolorosa o inflamada, o sin pulsos (75%)
  - Alteraciones visuales (20-50%): diplopía, pérdida súbita de visión o *amaurosis fugax*. El fondo de ojo puede presentar signos de isquemia óptica.
  - Síndrome constitucional (10%): fiebre, astenia, anorexia, pérdida de peso
  - Polimialgia reumática (PMR) acompañante (50%): dolor nocturno con intensa rigidez matutina en la cintura escapular y/o pelviana. La PMR sin datos típicos de arteritis no es sospechosa de ACG.
2. La sospecha de ACG requiere derivación urgente a Oftalmología o Reumatología, directamente o a través del servicio de Urgencias (según hospitales), especialmente en casos de pérdida de visión, pues, de no tratarse inmediatamente, la ceguera será permanente.
3. Perfil EAS: análisis inicial habitualmente disponible en Atención Primaria para enfermedades autoinmunes, que incluye hemograma, bioquímica básica, velocidad de sedimentación, proteína C reactiva, anticuerpos antinucleares (ANA) y orina elemental.
4. El diagnóstico de ACG se realiza por las características clínicas y los reactantes de fase aguda. El diagnóstico de certeza se alcanza mediante biopsia de la arteria temporal, que puede no ser necesaria en pacientes con enfermedad típica.
5. Los pacientes con sospecha de ACG deben ser tratados lo antes posible con corticoides, con dosis en torno a 1 mg/kg/d. El pronóstico depende de la rapidez de instauración del mismo.

## BIBLIOGRAFÍA

Cobo Ibáñez T, Alonso Esteban R. Las vasculitis sistémicas y la enfermedad de Behçet. En Muñoz Fernández S, Ubach Badía B (Eds). Enfermedades reumáticas autoinmunes sistémicas para médicos de Atención Primaria. YOU&US. Madrid, 2015: 57-70.

Martínez Taboada VM. Vasculitis de vaso grande. Arteritis de células gigantes. En Rúa-Figueroa I, Calvo Alen J, Cuadrado Alonso MF, Freire González MM, Martínez Taboada VM, Muñoz Fernández S, Ucar Angulo E (Eds). Manual SER de diagnóstico y tratamiento de las enfermedades reumáticas autoinmunes sistémicas. Elsevier. Barcelona 2014: 239-244.

González Gay MA, Rueda Gotor J. Arteritis de células gigantes. Polimialgia reumática. Arteritis de Takayasu. En Alperi López M, Balsa Criado A, Blanco Alonso R, Hernández Cruz B, Medina Luezas J, Muñoz Fernández S, Nolla Solé M, Román Ivorra JA (Eds). Manual SER de enfermedades reumáticas. Elsevier. Barcelona, 2014: 397-407.

Ninan J, Lester S, Hill C. Giant cell arteritis. Best Pract Res Clin Rheumatol 2016; 30(1): 169-88.

Buttgereit F, Dejaco C, Matteson EL, Dasgupta B. Polymyalgia rheumatic and giant cell arteritis. A systematic review. JAMA 2016; 315(22): 2442-2458.

# ENFERMEDADES AUTOINMUNES SISTÉMICAS GUÍA PARA DERIVACIÓN EN ATENCIÓN PRIMARIA SER-SEMFYC

## ABORTOS RECURRENTES

Dr. Enrique Nieto Pol

Sociedad Española de Medicina Familiar y Comunitaria (SEMFYC)

Especialista en Medicina Familiar y Comunitaria

Centro de Salud Concepción Arenal. Santiago de Compostela

Dr. José María Pego Reigosa

Sociedad Española de Reumatología (SER)

Especialista en Reumatología

Hospital Meixoeiro de Vigo. Instituto de Investigación Sanitaria Galicia Sur

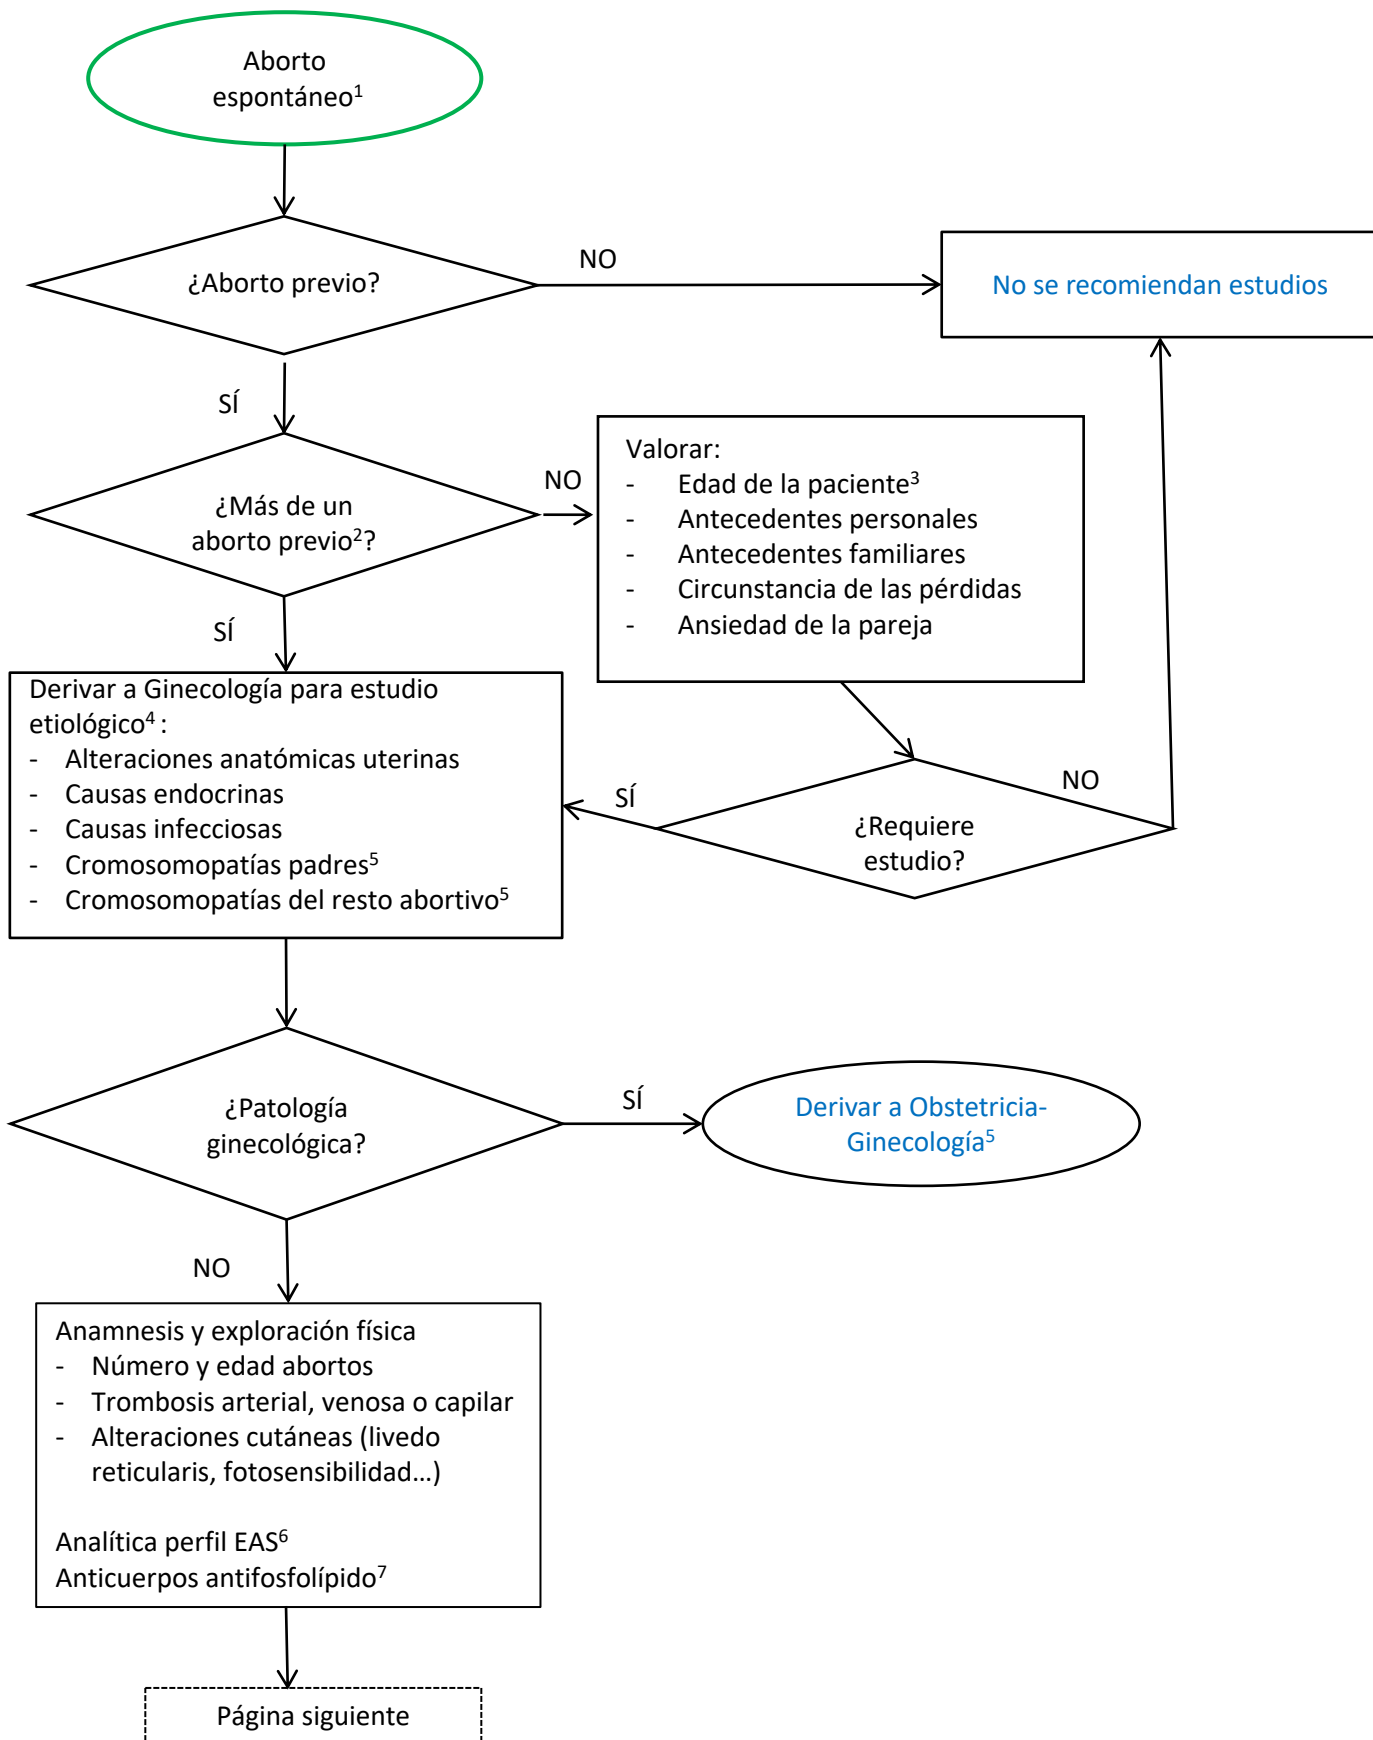

Viene de página anterior

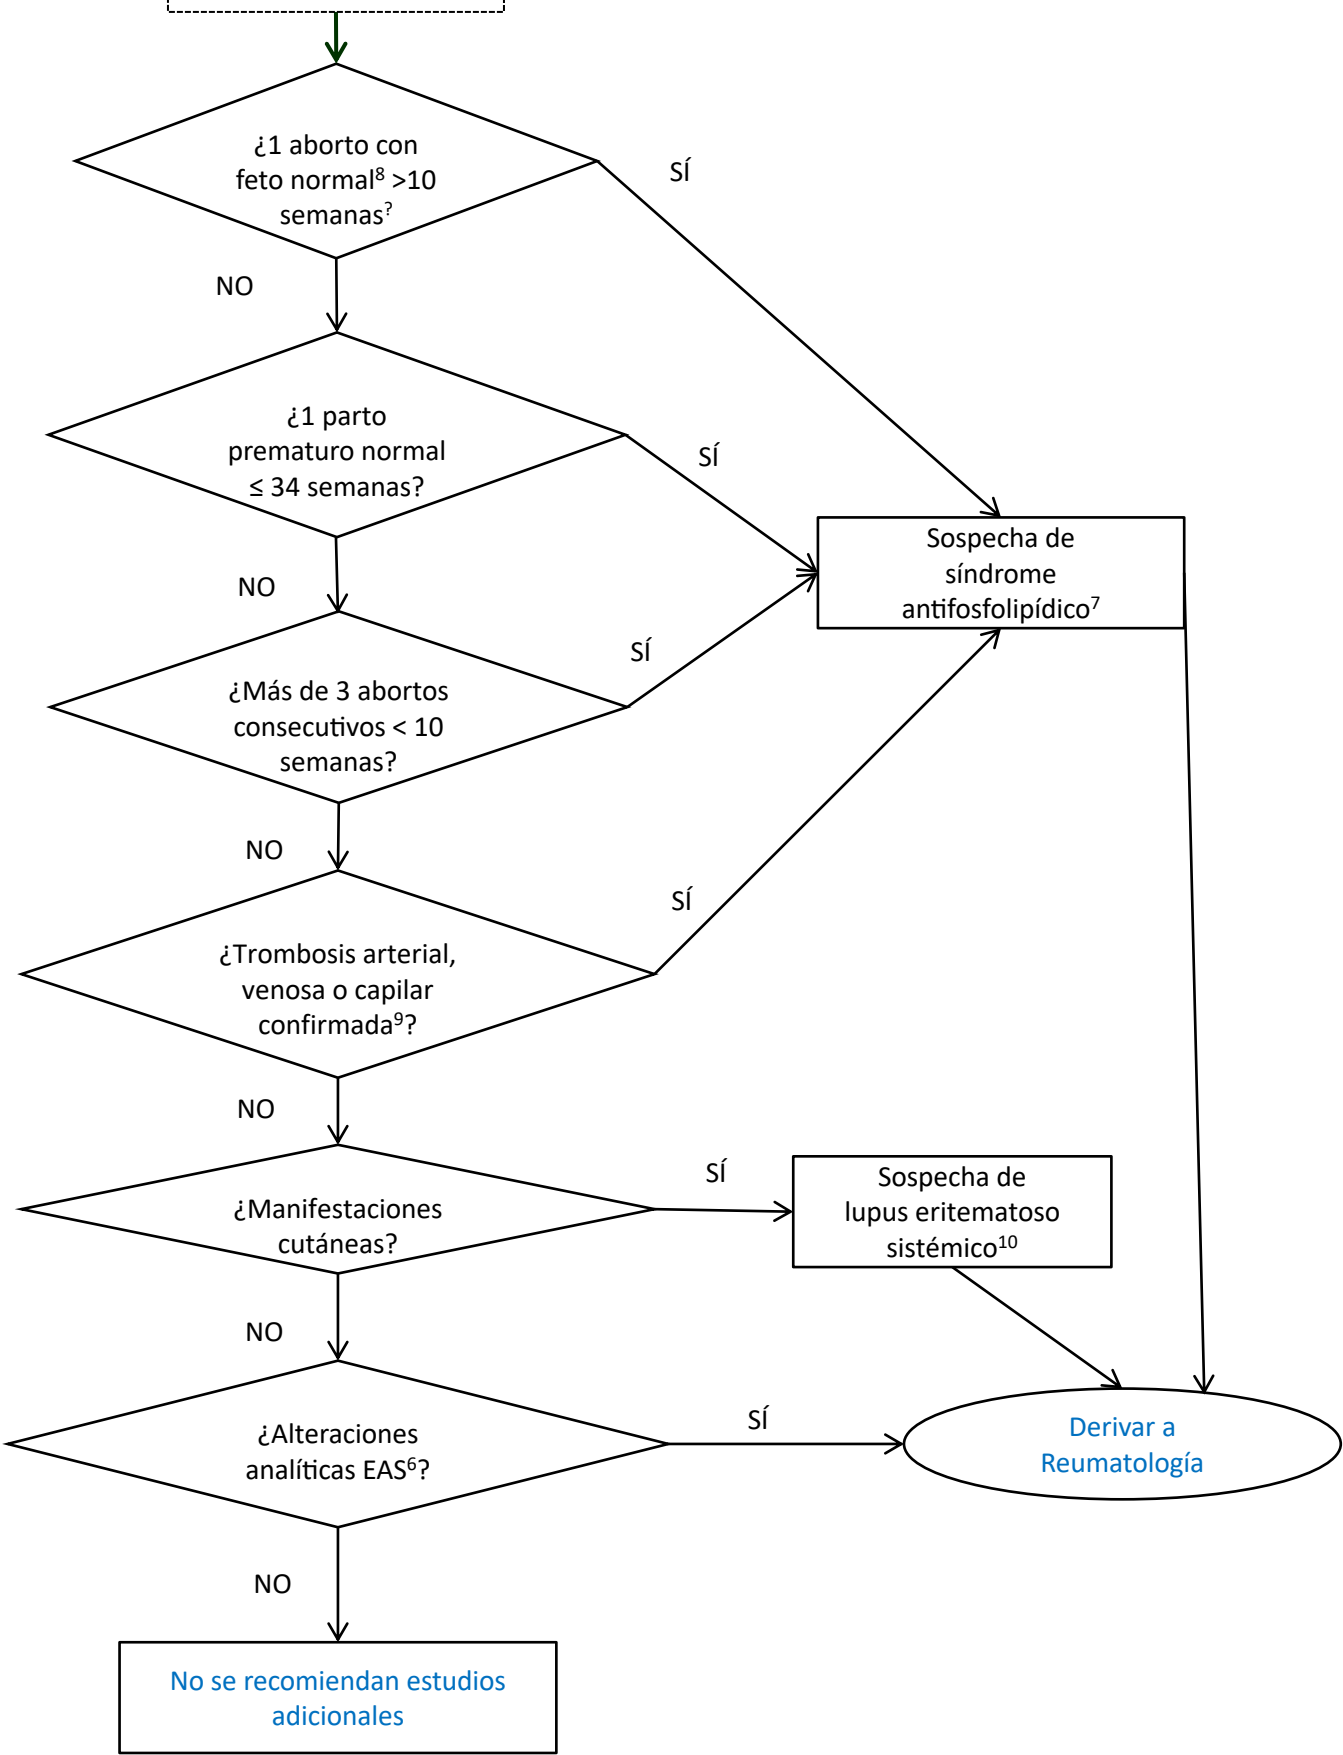

## NOTAS

1. Aborto es la pérdida de una gestación antes de la semana 20ª, excluida la gestación molar y el embarazo ectópico
2. Los abortos recurrentes o de repetición se definen como la pérdida espontánea de dos o más gestaciones (antes se definía a partir de 3 abortos consecutivos)
3. En mujeres < 30 años la probabilidad de nuevo aborto es <25%. En mujeres > 40 años la probabilidad es del 50-60%.
4. El 35-40% de casos serán de causa genética, 10-15% serán por síndrome antifosfolipídico (AF) y el 50% queda sin diagnóstico.
5. Opciones de abordaje de cromosomopatías:
  - Consejo genético
  - Esperar nueva gestación y hacer diagnóstico prenatal
  - Estudio cromosómico espermatozoides
  - Diagnóstico genético preimplantacional
  - Cambio de gametos
6. Perfil EAS: análisis inicial habitualmente disponible en Atención Primaria para enfermedades autoinmunes, que incluye hemograma, bioquímica básica, velocidad de sedimentación, proteína C reactiva, anticuerpos antinucleares (ANA) y orina elemental.
7. Se precisan 2 determinaciones positivas (títulos moderados/altos) de Ac antifosfolípidos (AAF) separadas por 12 semanas, para ser criterio diagnóstico síndrome antifosfolipídico. Son AAF:
  - El anticoagulante lúpico (AL), detectado por pruebas coagulométricas.
  - Los Ac anticardiolipina (ANCA), IgG o IgM detectados por enzoinmunoanálisis (ELISA).
  - Los Ac anti- $\beta$ -2-glucoproteína (Anti $\beta$ 2GPI), IgG o IgM detectados por ELISA.
8. Se considera feto morfológicamente normal si se confirma por ecografía o examen directo.
9. Trombosis sin causa aparente ni factores de riesgo, de repetición o en localización infrecuente, confirmada por imagen, Doppler o histología (sin evidencia de inflamación de la pared vascular).
10. Leucopenia, linfopenia, trombopenia, tiempo de tromboplastina parcial activado (TTPA) prolongado, proteinuria/leucocituria/hematuria/cilindruria, C3 ó C4 bajos, positividad de los autoanticuerpos.

## BIBLIOGRAFÍA

Fábregues Gasol F, Peñarrubia Alonso J. Estudio y tratamiento de las pérdidas gestacionales recurrentes. En: Guías de Práctica Clínica SEF-SEGO, Guía 26 [Internet]. Institut Clinic de Obstetricia, Ginecologia y Neonatologia (ICGON). Hospital Clinic. Barcelona. [Citado 6 de abril de 2018].

Recuperado a partir de:

<http://www.sefertilidad.net/index.php?seccion=biblioteca&subSeccion=guiasPracticaClinicas>

Miyakis S, Lockshin MD, Atsumi T, Branch DW, Brey RL, Cervera R, et al. International consensus statement on an update of the classification criteria for definite antiphospholipid syndrome (APS). J Thromb Haemost 2006;4(2):295-306.

Tejón Menéndez P, Pego Reigosa JM. Síndrome antifosfolipídico. En: Manual SER de enfermedades reumáticas, 6ª Edición. Sociedad Española de Reumatología (SER). Ed. Elsevier España, S.L. Barcelona; 2014. p. 349-54.

# ENFERMEDADES AUTOINMUNES SISTÉMICAS

## GUÍA PARA DERIVACIÓN EN ATENCIÓN PRIMARIA

### SER-SEMFYC

# ARTRITIS AGUDA

Dra. Carmen Costa Ribas

Sociedad Española de Medicina Familiar y Comunitaria (SEMFYC)

Especialista en Medicina Familiar y Comunitaria

Centro de Salud Vila. Ibiza

Dra. Ana Urruticoechea-Arana

Sociedad Española de Reumatología (SER)

Especialista en Reumatología

Hospital Can Misses. Ibiza



## Artritis aguda<sup>1</sup>

### ANAMNESIS Y EXPLORACIÓN FÍSICA

- Síndrome constitucional
- Febrícula/ fiebre
- Exantema fotosensible
- Adenopatías
- Síndrome seco: xerostomía/xeroftalmia
- Fenómeno de Raynaud
- Vasculitis cutánea
- Eritema malar
- Aftas orales y/o genitales
- Disfagia/disfonía
- Debilidad muscular
- Uveítis
- Alopecia
- Dolor/inflamación nariz u orejas

¿Manifestaciones sistémicas?

NO

Traumatismo  
Osteoartritis

Manejo en Atención  
Primaria

SÍ

Pruebas complementarias:  
Perfil EAS<sup>4</sup>, complemento, proteinograma, inmunología  
Rx tórax y articulaciones afectadas  
Artrocentesis y examen de líquido sinovial<sup>3</sup> (tabla 1)

¿Datos de laboratorio de inflamatoria?<sup>7</sup>

SÍ

Página siguiente

NO

¿Sospecha de infecciosa?

NO

Considerar  
- Linfoma  
- Síndromes paraneoplásicos

SÍ

¿Monoartritis con inflamación severa?

SÍ

Artritis séptica

Derivación a  
Reumatología o  
Infecciosas

NO

¿Síntomas generales?

SÍ

Parvovirus B 19, VIH,  
CMV, Epstein Barr,  
Hepatitis B o C, Borrelia

NO

- Síntomas urinarios: Ureaplasma, Chlamydia, Gonococo
- Síntomas gastrointestinales: Salmonella, Shigella, Yersinia

Viene de página anterior

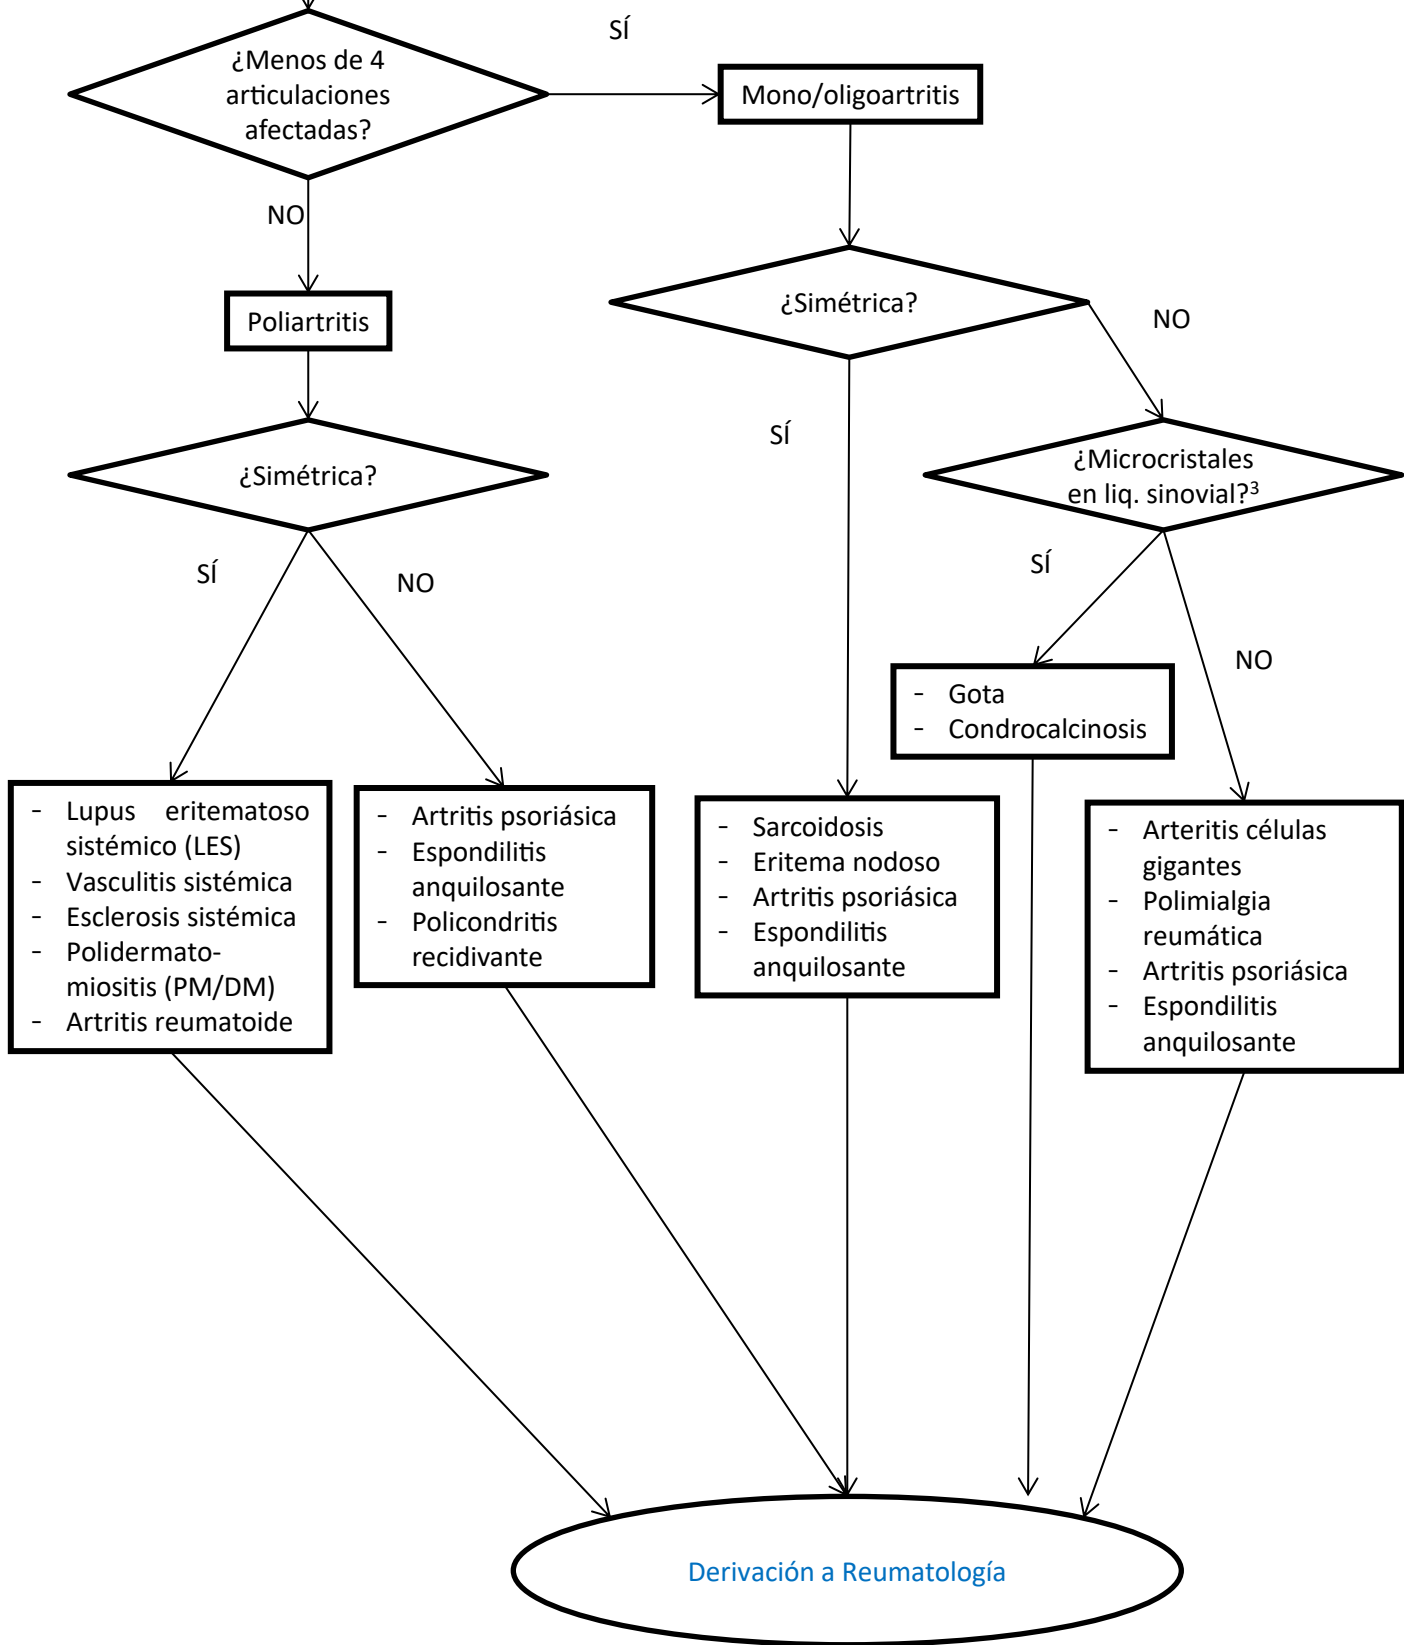

## NOTAS

1. Artritis aguda: dolor articular inflamatorio (tumefacción, calor, rubor e impotencia funcional) de menos de 6 semanas
1. Perfil EAS: análisis inicial habitualmente disponible en Atención Primaria para enfermedades autoinmunes, que incluye hemograma, bioquímica básica, velocidad de sedimentación, proteína C reactiva, anticuerpos antinucleares (ANA) y orina elemental.
2. El estudio del líquido sinovial nos ayuda a diferenciar grupos de enfermedades y localizar microcristales (tabla 1)

## BIBLIOGRAFÍA

Ramos Casals M, Sisó Almirall A. Guía Clínica Enfermedades Autoinmunes Sistémicas SEMI-semFYC2014.Artritis. <https://www.semfyc.es/wp-content/uploads/2016/05/guia-autoinmunes-semi-semfyc.pdf>

Manual SER de diagnóstico y tratamiento de las enfermedades reumáticas autoinmunes sistémicas, 1ª edición Elsevier España. Artritis como inicio de enfermedad Autoinmune sistémica. M. Alperi López. 77-82 2014 [http://www.ser.es/wp-content/uploads/2015/09/Manual\\_ERAS.pdf](http://www.ser.es/wp-content/uploads/2015/09/Manual_ERAS.pdf)

Manual SER de enfermedades reumáticas, 6ª edición Elsevier España. Poliartritis A.Gómez centeno 91-9.5 <https://www.ser.es/wp-content/uploads/2015/10/Manual-SER.pdf>

Siva C, Velazquez C, Mody A, Brasington R. Diagnosing acute monoarthritis in adults: a practical approach for the family physician. Am Fam Physician. 2003 Jul1;68(1):83-90. Review. PubMed PMID: 12887114.

Pujalte GG, Albano-Aluquin SA. Differential Diagnosis of PolyarticularArthritis. Am Fam Physician. 2015 Jul 1;92(1):35-41. Review. PubMed PMID:26132125.

Tabla 1. Estudio de líquido sinovial

| TIPO                | Artritis por cristales         | Artritis no inflamatoria (osteoartritis)            | Artritis inflamatoria  | Artritis séptica                                     | Artritis tumoral, derrame o fractura |
|---------------------|--------------------------------|-----------------------------------------------------|------------------------|------------------------------------------------------|--------------------------------------|
| Características     | Turbio, presencia de cristales | Claro                                               | Turbio                 | Purulento                                            | Hemático                             |
| Recuento leucocitos | >2.000/mm <sup>3</sup>         | < 2.000/mm <sup>3</sup><br>>75% polimorfo-nucleares | >2.000/mm <sup>3</sup> | >50.000/mm <sup>3</sup> hasta 100.00/mm <sup>3</sup> |                                      |

# ENFERMEDADES AUTOINMUNES SISTÉMICAS

## GUÍA PARA DERIVACIÓN EN ATENCIÓN PRIMARIA

### SER-SEMFYC

# ARTRITIS CRÓNICA

Dra. Ana Urruticoechea-Arana

Sociedad Española de Reumatología (SER)

Especialista en Reumatología

Hospital Can Misses. Ibiza

Dra. Carmen Costa Ribas

Sociedad Española de Medicina Familiar y Comunitaria (SEMFYC)

Especialista en Medicina Familiar y Comunitaria

Centro de Salud Vila. Ibiza

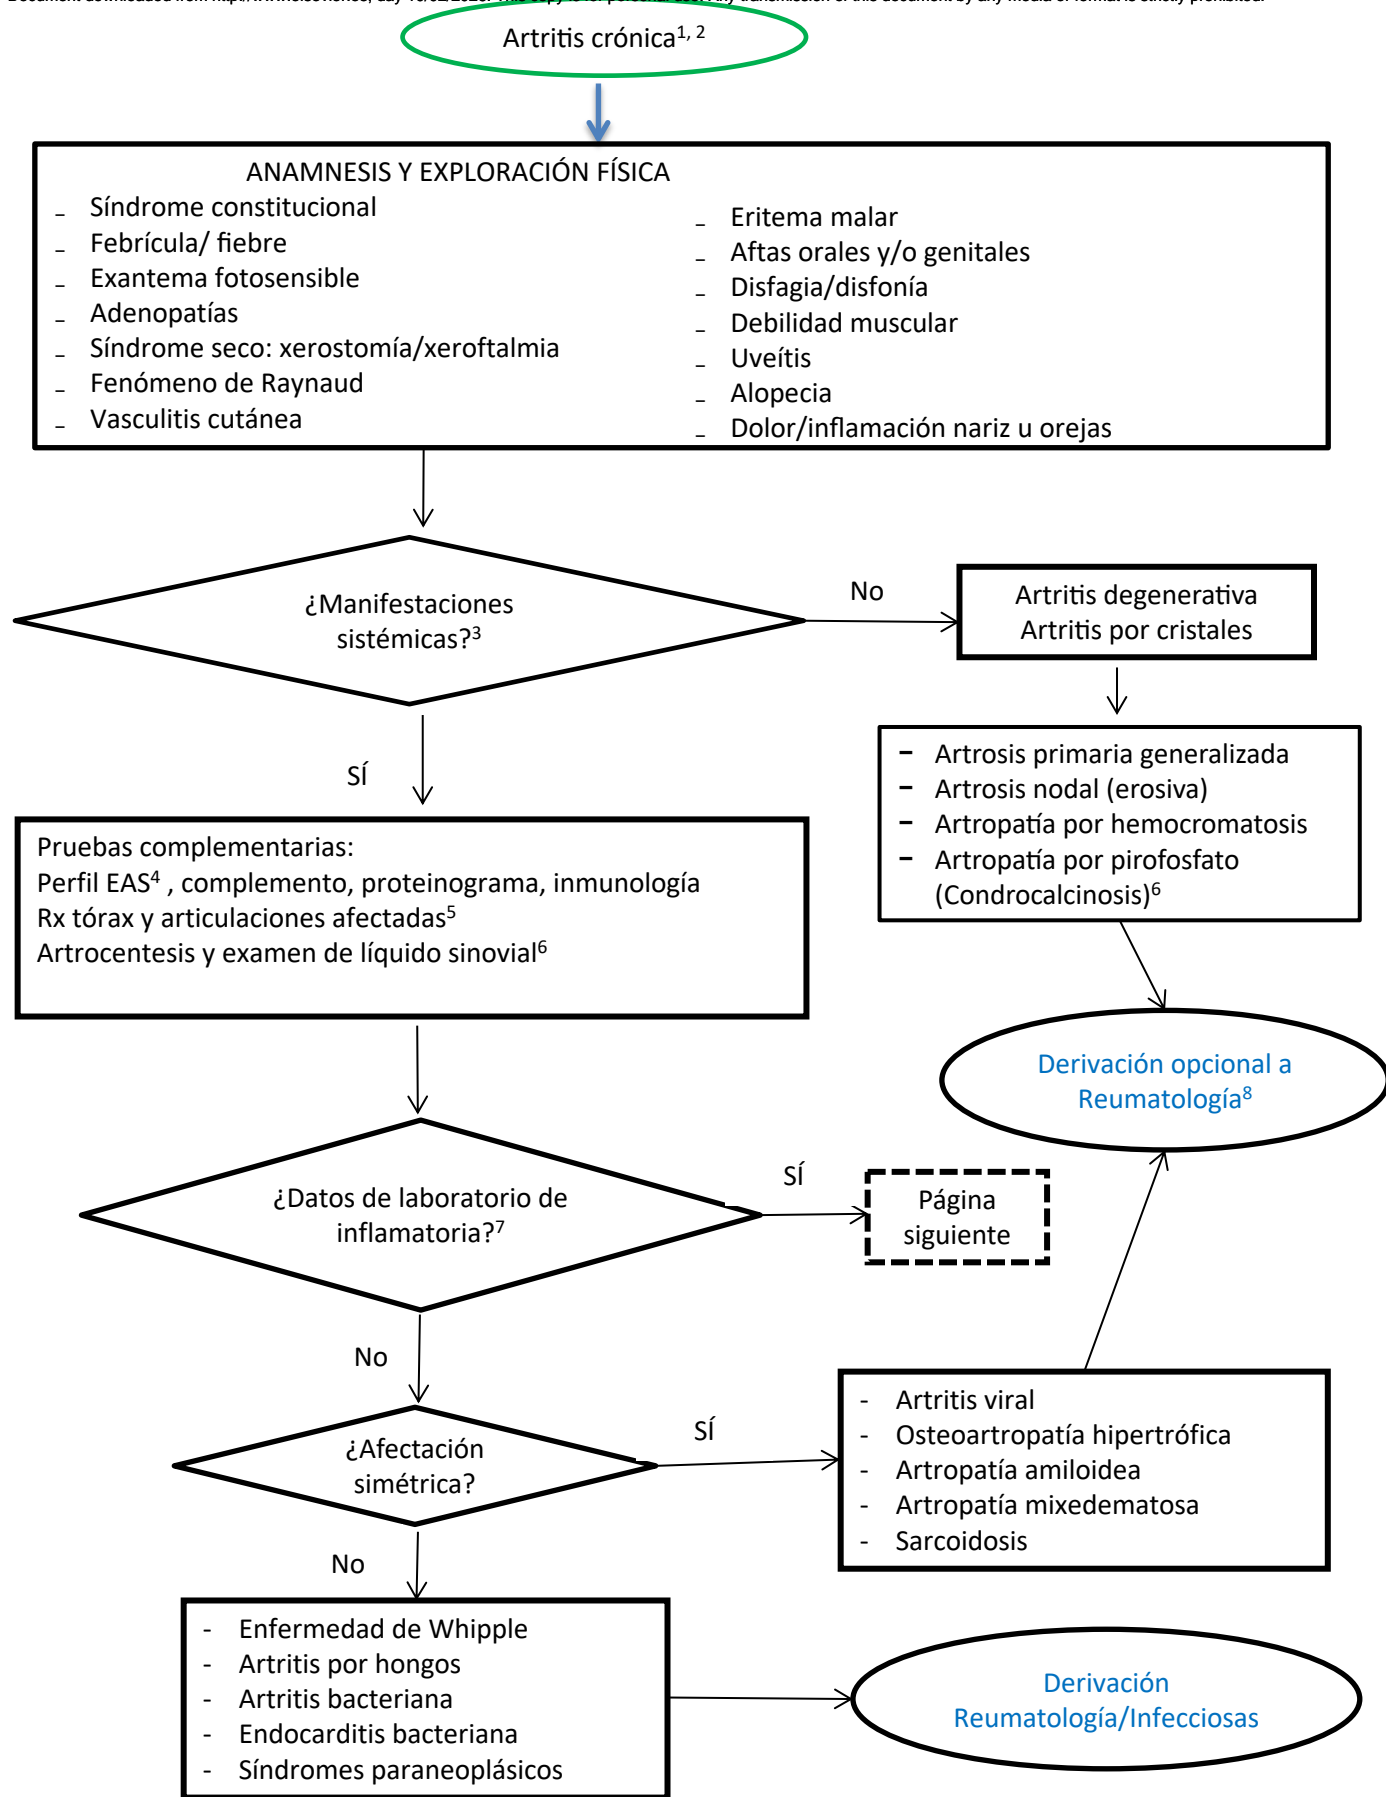

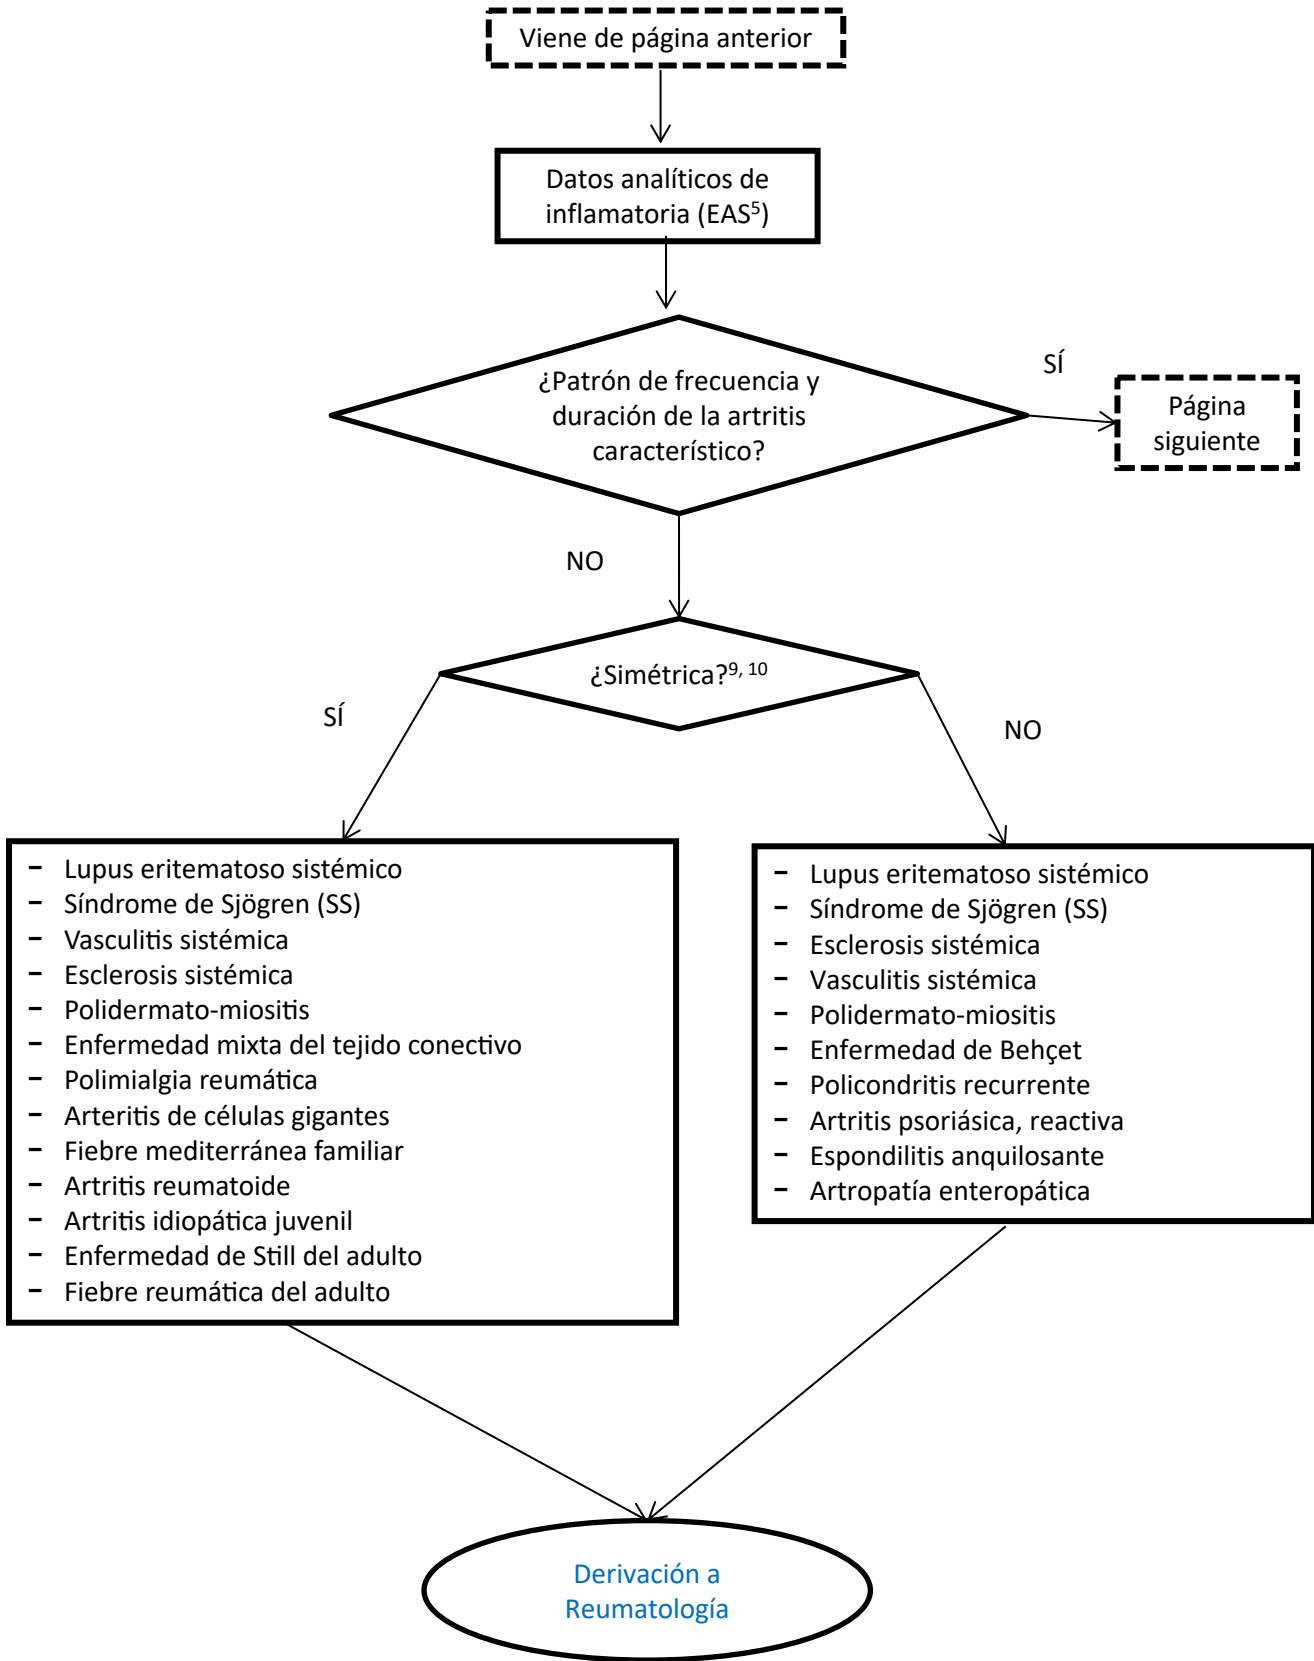

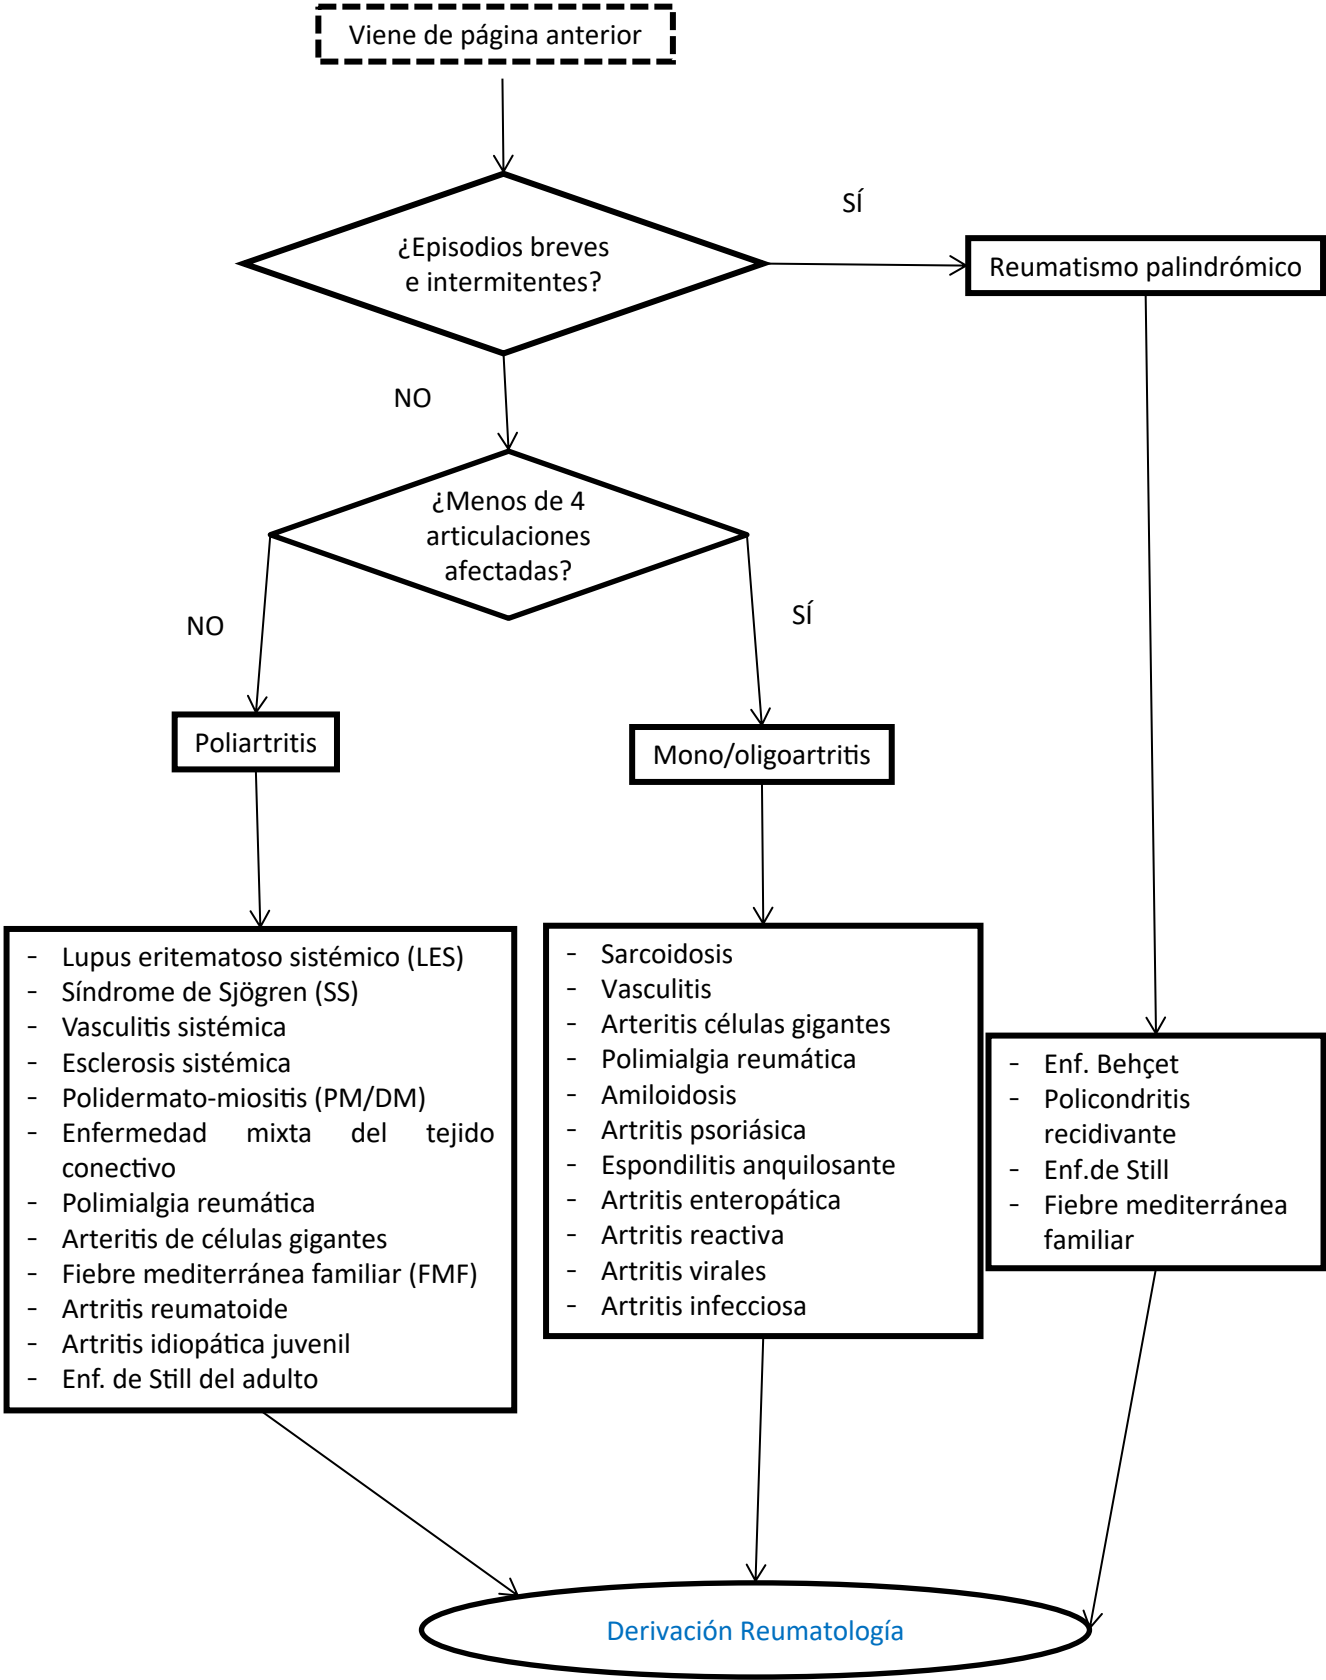

## NOTAS

1. Artritis crónica: dolor articular inflamatorio (tumefacción, calor, rubor, impotencia funcional) de  $\geq 6$  semanas. Cursa con dolor de tipo inflamatorio persistente en reposo, con rigidez matutina  $> 30$  minutos y frecuentemente signos constitucionales  $> 6$  semanas.
2. La poliartritis crónica (afectación  $> 4$  articulaciones) es una manifestación común en las enfermedades autoinmunes sistémicas (EAS) a menudo como forma de presentación, precediendo otras manifestaciones, lo que supone un desafío diagnóstico
3. Se descartarán procesos infecciosos o neoplásicos antes de considerar el diagnóstico de EAS
4. Perfil EAS: análisis inicial habitualmente disponible en Atención Primaria para enfermedades autoinmunes, que incluye hemograma, bioquímica básica, velocidad de sedimentación, proteína C reactiva, anticuerpos antinucleares (ANA) y orina elemental.
5. Sospechar EAS por alteración del hemograma (leucopenia, linfopenia, anemia de trastorno crónico o hemolítica), hipocomplementemia, hipergammaglobulinemia policlonal, alteraciones de la función renal o hepática, o inmunológicas (ANA, anticuerpos anti péptidos cíclicos citrulinados, ANCAS)
6. Radiología: tórax, manos, pies y pelvis según la afectación.
7. Estudio de líquido sinovial: se realiza en las consultas de reumatología ante sospecha infecciosa y cristales. Se estudiará el aspecto macroscópico, cultivo, Gram y visualización cristales.
8. En el caso de la poliartritis la derivación a reumatología será opcional
9. Se han definido diferentes patrones:
  - **Patrón de afectación articular intermitente** ("palindrómico"): la enfermedad de Behçet, la Fiebre mediterránea familiar (FMF), policondritis recidivante (PR), la panarteritis nodosa (PAN) y la granulomatosis con poliangiitis (vasculitis sistémicas).
  - **Patrón mono-/oligoarticular**: vasculitis sistémicas, sarcoidosis, arteritis células gigantes, polimialgia reumática, amiloidosis, espondilitis anquilosante, artritis psoriásica y artritis enteropática.
  - **Patrón poliarticular**: vasculitis sistémicas, lupus eritematoso sistémico, síndrome de Sjögren, esclerodermia, enfermedad mixta del tejido conectivo, polimiositis/dermatomiositis, artritis reumatoide y enfermedad de Still
  - **Patrón polimialgico**: arteritis de células gigantes, PAN, polimiositis/dermatomiositis (PM/DM), la amiloidosis, artritis reumatoide (AR) y el lupus eritematoso sistémico (LES) en el anciano.
10. Diagnóstico diferencial de la Poliartritis crónica simétrica:
  - Afecta preferentemente a pequeñas articulaciones de las manos. El LES, síndrome de Sjögren (SS), esclerosis sistémica (ES), polidermato-miositis y vasculitis sistémica pueden presentarse con este patrón, pero a diferencia de la AR la artritis no es erosiva. También pueden debutar como asimétrica el LES, SS, polidermato-miositis y vasculitis sistémica.
  - La enfermedad mixta del tejido conectivo cursa con poliartritis tipo AR que a menudo es erosiva.
  - La enfermedad de Still del adulto suele cursar con un cuadro poliarticular y simétrico con fiebre, puede afectar también a las interfalángicas distales y ser destructiva, o remitir sin secuelas.
  - La poliartritis nodosa (PAN), granulomatosis con poliangiitis (Wegener), sarcoidosis, fiebre mediterránea familiar (FMF) y amiloidosis se pueden observar diferentes patrones de afectación articular, entre ellos una poliartritis que se puede confundir con la AR.
  - La artritis en las miopatías inflamatorias no son erosivas, con distribución puede ser similar a la AR



## BIBLIOGRAFÍA

Manual SER de diagnóstico y tratamiento de las enfermedades reumáticas autoinmunes sistémicas, 1ª edición Elsevier España. Evaluación del paciente con fiebre, lesiones cutáneas y artralgias; Artritis como inicio de enfermedad Autoinmune sistémica. M.M. Freire 39-44; M. Alperi López.77-82,2014 [http://www.ser.es/wpcontent/uploads/2015/09/Manual\\_ERAS.pdf](http://www.ser.es/wpcontent/uploads/2015/09/Manual_ERAS.pdf)

Pujalte GG, Albano-Aluquin SA. Differential Diagnosis of PolyarticularArthritis. Am Fam Physician. 2015 Jul 1;92(1):35-41. Review. PubMed PMID:26132125

Manual SER de enfermedades reumáticas, 6ª edición Elsevier España. Poliartritis A. Gómez Centeno 91-9.5. <https://www.ser.es/wp-content/uploads/2015/10/Manual-SER.pdf>

Sergent JS, Fuchs HA. Polyarticular Arthritis. En: Firenstein GS, Budd RC, Gabriel SE, McInnes IB, Ruddy S, Sergent JS, editors. Kelley's Textbook of Rheumatology. Philadelphia, Saunders Elsevier, 2009; 545-53.

# ENFERMEDADES AUTOINMUNES SISTÉMICAS

## GUÍA PARA DERIVACIÓN EN ATENCIÓN PRIMARIA

### SER-SEMFYC

# ARTROMIALGIAS

Dr. Javier Narváez García

Sociedad Española de Reumatología (SER)

Especialista en Reumatología

Hospital Universitario Bellvitge. Barcelona

Dr. Xavier Mas Garriga

Sociedad Española de Medicina Familiar y Comunitaria (SEMFYC)

Especialista en Medicina Familiar y Comunitaria

EAP Santa Eulàlia Sud. L'Hospitalet de Llobregat (Barcelona)

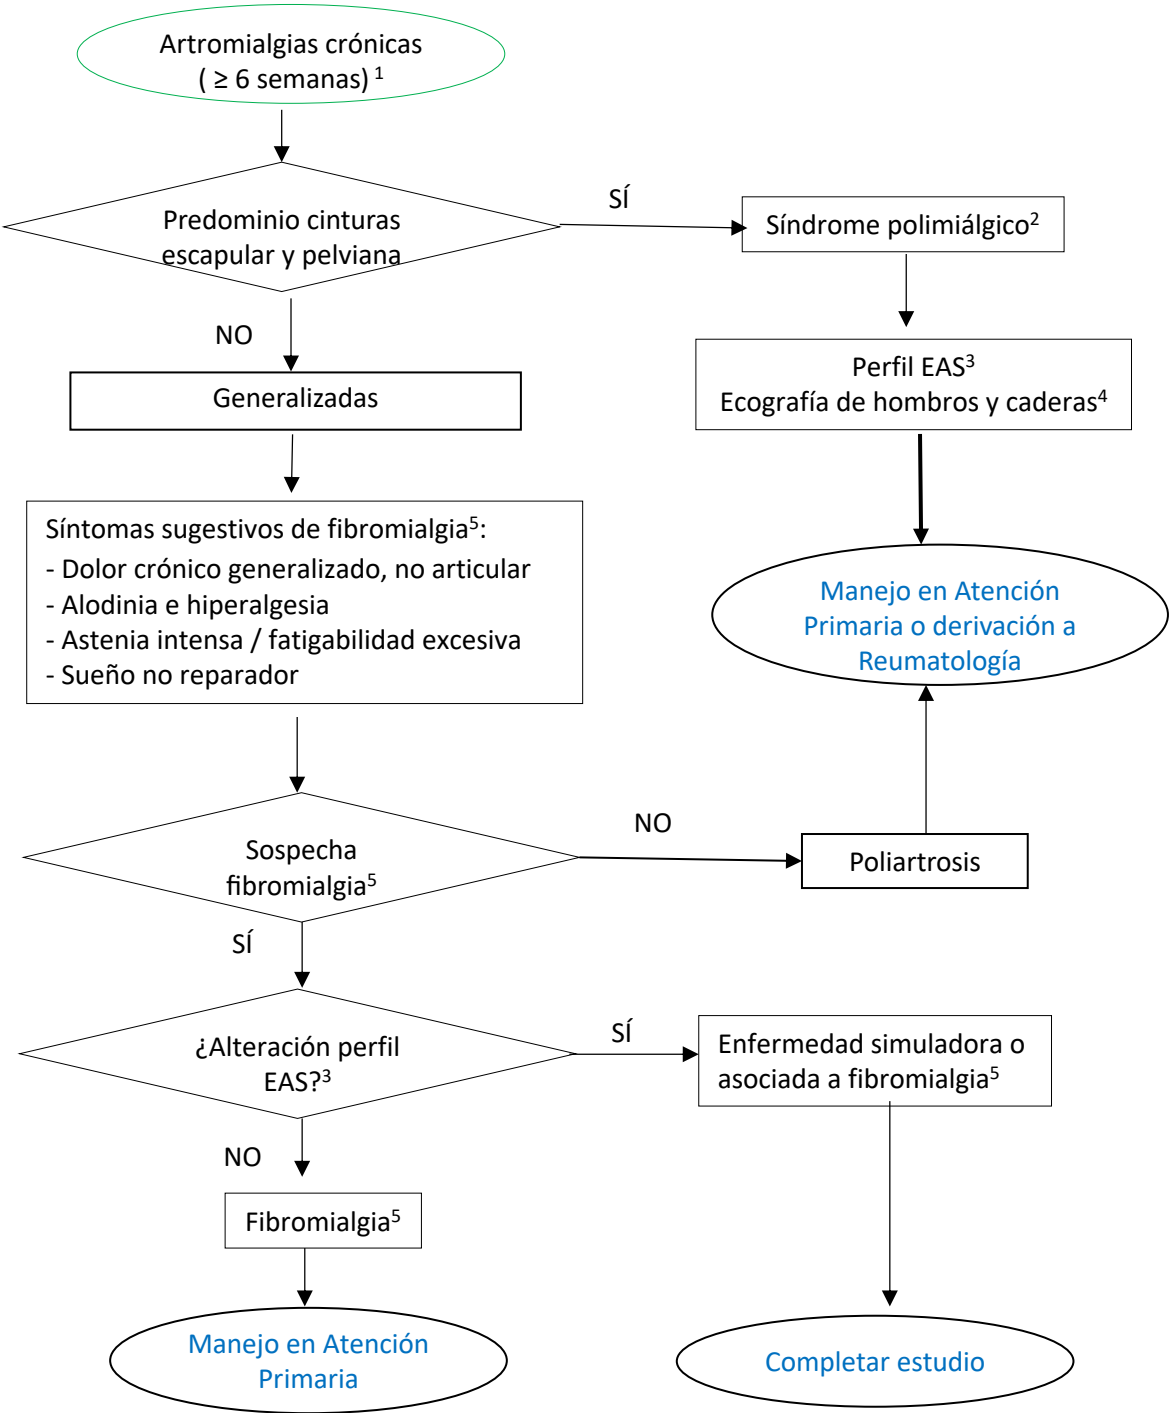

## NOTAS

1. Según las cifras de los reactantes de fase aguda, el síndrome polimiálgico sugiere:
  - **Elevación de los reactantes de fase aguda:** artritis reumatoide de inicio en la edad tardía (EORA) /poliartritis simétrica seronegativa del anciano, lupus eritematoso sistémico (LES), miopatías inflamatorias, síndrome RS3PE (*remitting seronegative symmetrical synovitis with pitting edema*), condrocalcinosis (*síndrome de la apófisis odontoides coronada*), neoplasias (metástasis, mieloma múltiple) e infecciones (endocarditis infecciosa, tuberculosis)
  - **Normalidad de reactantes de fase aguda:** osteomalacia, hipotiroidismo y Enf. Parkinson.
2. Ante la sospecha polimialgia reumática (PMR) buscar manifestaciones craneales (cefalea, claudicación mandibular y alteraciones visuales) y explorar las arterias temporal (arteritis de células gigantes)
3. Perfil EAS: análisis inicial habitualmente disponible en Atención Primaria para enfermedades autoinmunes, que incluye hemograma, bioquímica básica, velocidad de sedimentación, proteína C reactiva, anticuerpos antinucleares (ANA) y orina elemental. La petición de otras pruebas (hormonas tiroideas, proteinograma) y pruebas de imagen será en función de la sospecha clínica.
4. La ecografía de hombros y de caderas se ha incluido dentro de los nuevos criterios de clasificación EULAR/ACR 2012 para PMR: bursitis subdeltoidea, tenosinovitis bicipital, sinovitis glenohumeral (posterior o axilar) al menos en un hombro, o sinovitis/trocanteritis al menos en una cadera.
5. El diagnóstico **de fibromialgia (FM) es clínico**, no existe ninguna prueba de laboratorio o imagen diagnóstica. Inicialmente se establecía en base a los criterios del *American College of Rheumatology* de 1990 con dolor a la presión en al menos 11 de 18 puntos gatillo. En 2010 han aparecido otros criterios diagnósticos (*Fibromyalgia Survey Diagnostic Criteria*)
  - Índice de dolor Generalizado (*Widespread Pain Index – WPI*)  $\geq 7/19$  e índice de Gravedad de Síntomas (*Symptom Severity Score – SS Score*)  $\geq 5/12$ ; ó WPI 3-6 y SS  $\geq 9$ .
  - Síntomas presentes, en un nivel similar, durante los últimos tres meses.
  - El enfermo no tiene otra patología que explique el dolor.
6. Enfermedades que simulan FM: lupus eritematosos sistémico, síndrome de Sjögren, artritis reumatoide, espondiloartropatías, esclerosis múltiple, hipotiroidismo, miopatías (metabólicas, inflamatorias o por fármacos), polimialgia reumática, insuficiencia suprarrenal crónica, neuropatías periféricas, alteraciones estructurales mecánicas o degenerativas del raquis, poliartrosis, trastorno depresivo mayor, cáncer o hiperparatiroidismo

## BIBLIOGRAFÍA

Wolfe F, Smythe HA, Yunus MB, Bennett RM, Bombardier C, Goldenberg DL et al. The American College of Rheumatology 1990 criteria for the classification of fibromyalgia. *Arthritis Rheum* 1990;33:160-72

Wolfe F, Clauw DJ, Fitzcharles MA, Goldenberg DL, Katz RS, Mease P, et al. The American College of Rheumatology preliminary diagnostic criteria for fibromyalgia and measurement of symptom severity. *Arthritis Care Res (Hoboken)* 2010 ;62:600-10.

Esteve-Vives J, Rivera J, Salvat MI, de Gracia M, Alegre C. Propuesta de una versión de consenso del Fibromyalgia Impact Questionnaire (FIQ) para la población española. *Reumatología Clínica* 2007; 3:21-4.

Fibromialgia. Ministerio de Sanidad, Servicios Sociales e Igualdad. <https://www.msssi.gob.es/profesionales/prestacionesSanitarias/publicaciones/docs/fibromialgia.pdf>

# ENFERMEDADES AUTOINMUNES SISTÉMICAS GUÍA PARA DERIVACIÓN EN ATENCIÓN PRIMARIA SER-SEMFYC

## SÍNDROME CONSTITUCIONAL

Dra. M<sup>a</sup> Victoria Hernández Miguel  
Sociedad Española de Reumatología (SER)  
Especialista en Reumatología  
Hospital Clínico y Provincial. Barcelona

Dr. Xavier Mas Garriga  
Sociedad Española de Medicina Familiar y Comunitaria (SEMFYC)  
Especialista en Medicina Familiar y Comunitaria  
EAP Santa Eulàlia Sud. L'Hospitalet de Llobregat (Barcelona)

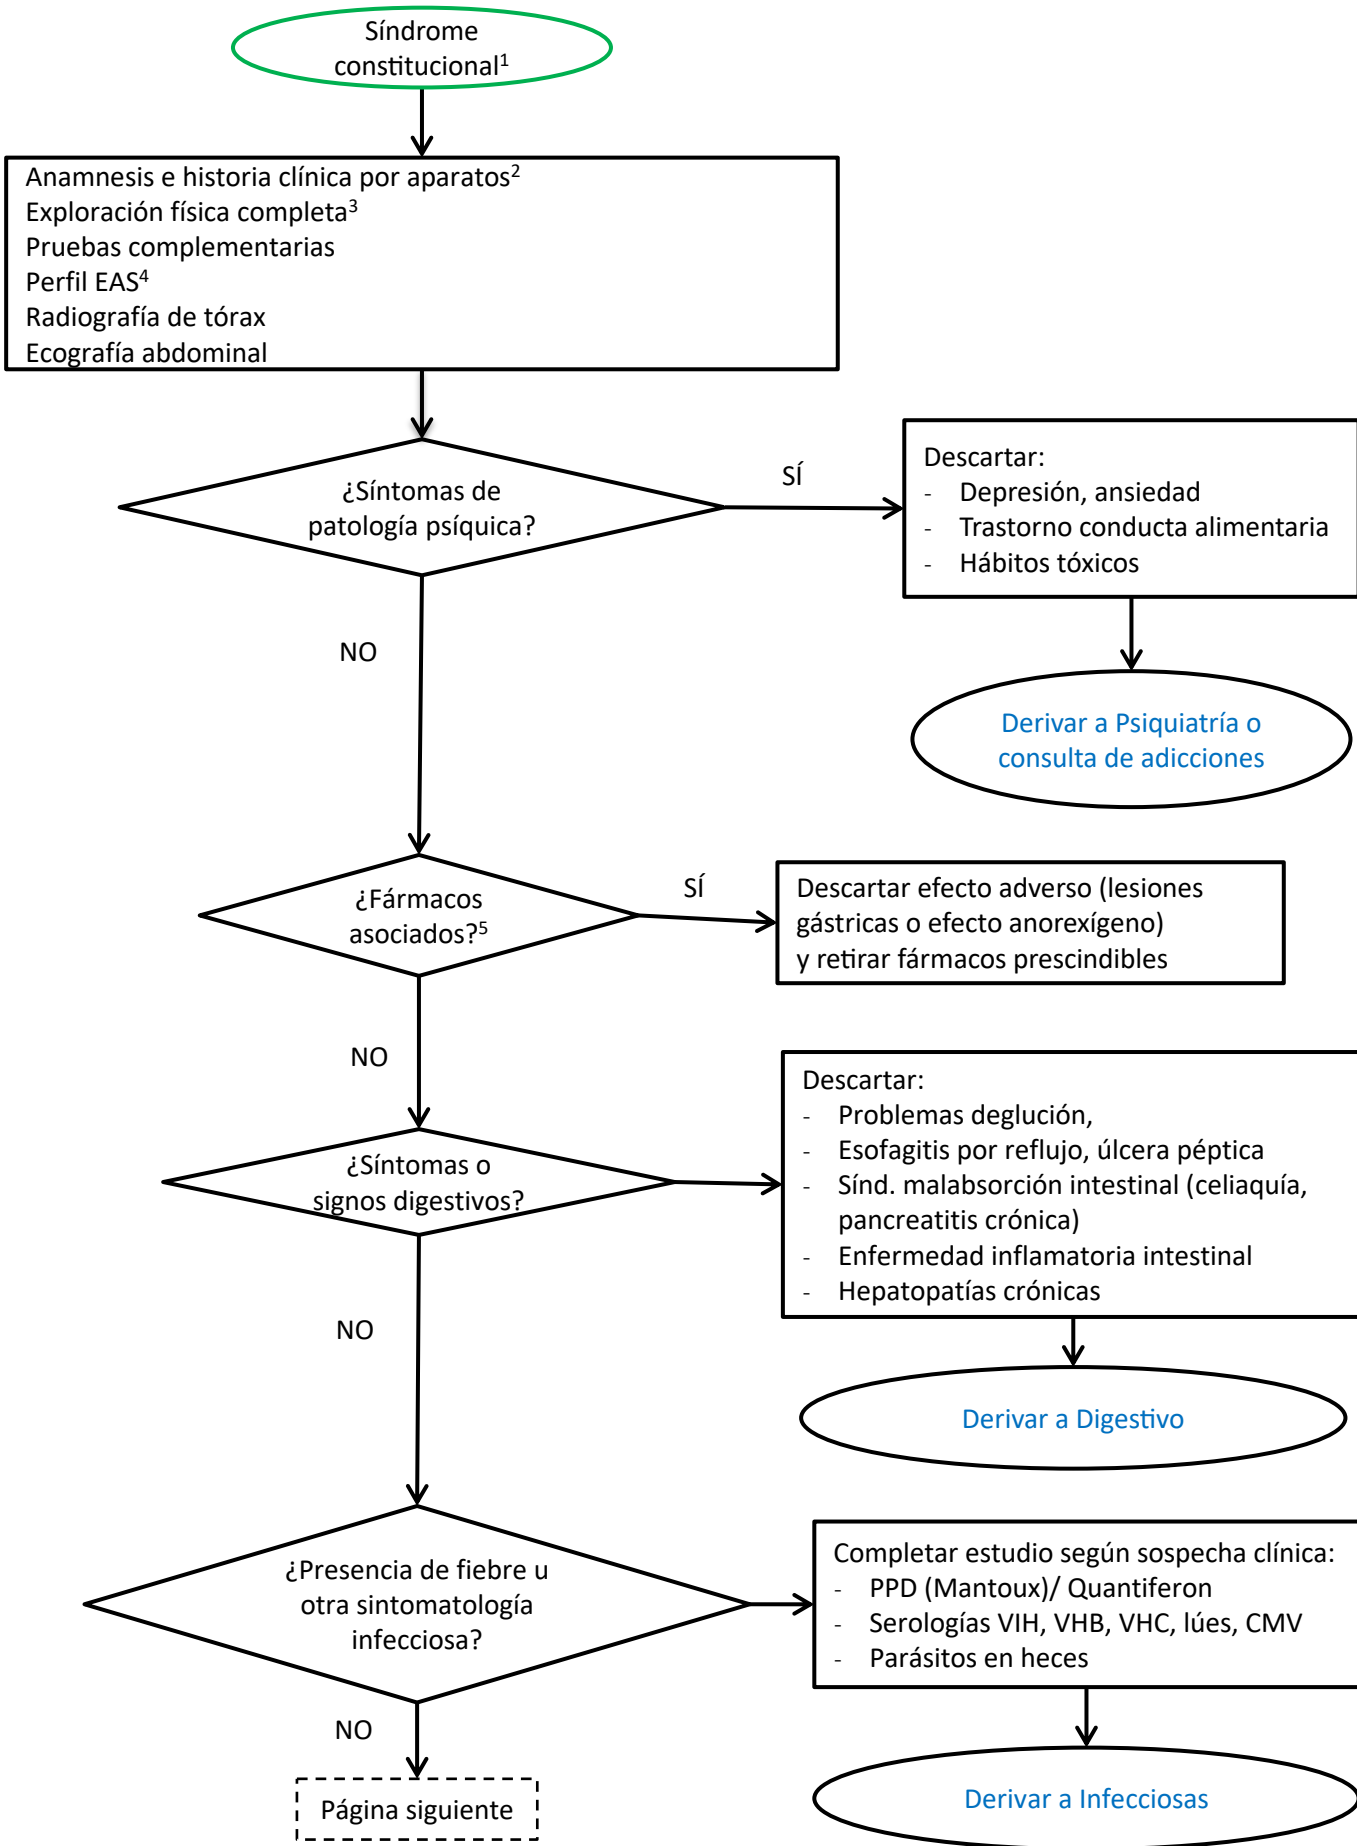

Viene de página anterior

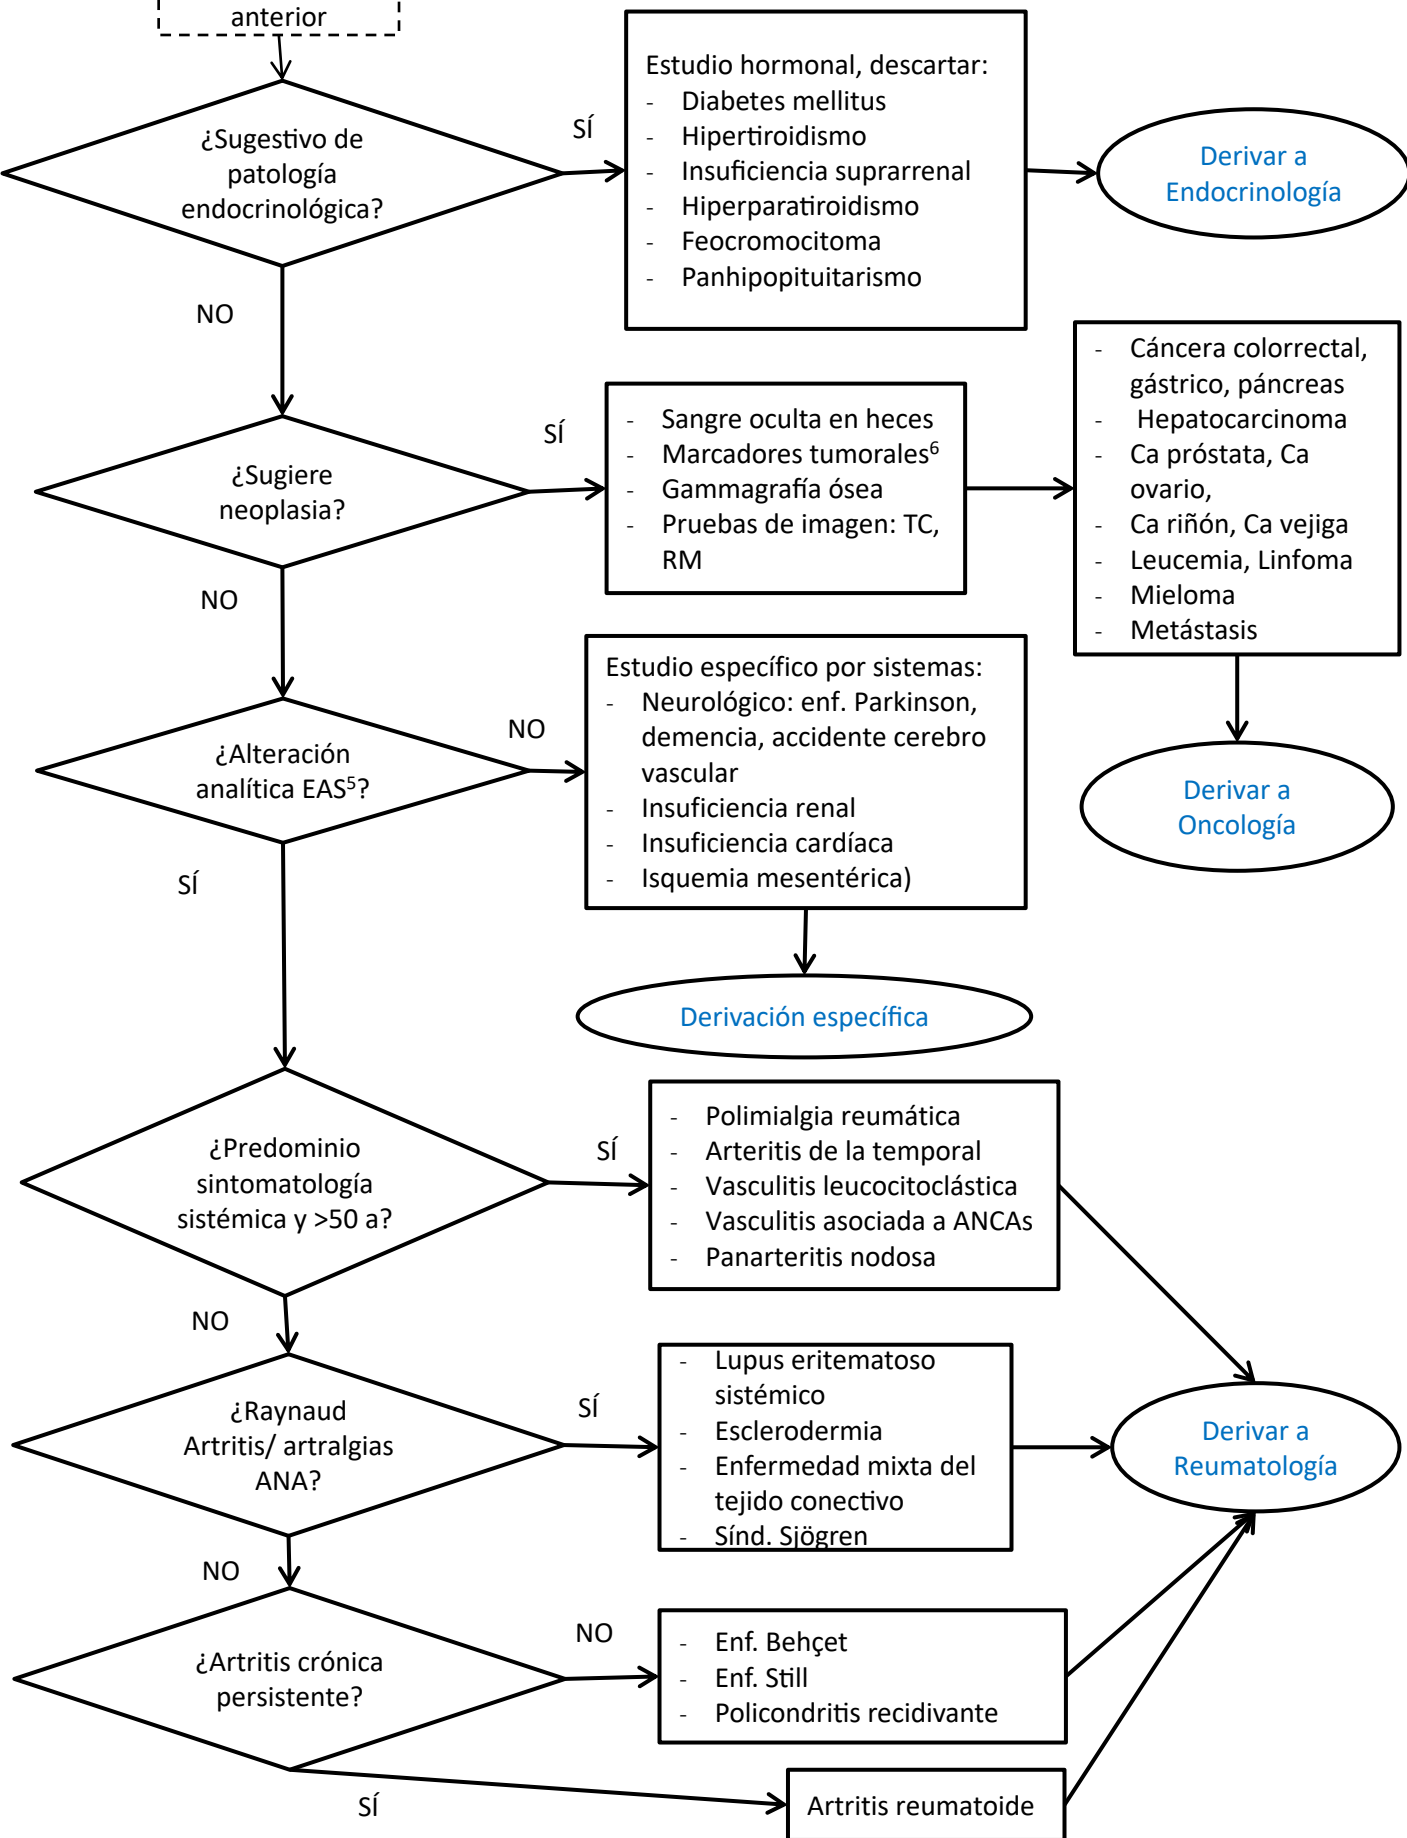

## NOTAS

1. El síndrome constitucional se define como: astenia, anorexia y pérdida de peso, definiéndose la pérdida de peso como disminución de, al menos, el 5% del peso corporal total en 6 meses. Este último punto se comprueba según la fórmula:  $(\text{peso habitual} - \text{peso actual}) \times 100 / \text{peso habitual}$ .
2. Anamnesis incluirá: antecedentes familiares y personales, hábitos dietéticos, síntomas acompañantes, fármacos, situación socioeconómica.
3. Exploración física: exploración por aparatos: valoración de presencia de alteraciones cutáneas. cavidad bucal, tiroides, óticas, nasales, laríngeas, presencia de adenopatía, masas o vísceromegalias.
4. Perfil EAS: análisis inicial habitualmente disponible en Atención Primaria para enfermedades autoinmunes, que incluye hemograma, bioquímica básica, velocidad de sedimentación, proteína C reactiva, anticuerpos antinucleares (ANA) y orina elemental.
5. Fármacos sospechosos: digoxina, antiinflamatorios no esteroideos, estatinas, diuréticos...
6. Marcadores tumorales: incluirían PSA (próstata), AFP (hepatocarcinoma), beta-2-microglobulina (mieloma y linfomas), CEA (colon), Ca 15.3 (mama), Ca 19.9 (páncreas), Ca 125 (ovario), enolasa neuronal específica (tumor neuroendocrino), BTA (vejiga).
7. El diagnóstico de la enfermedad de Still es un diagnóstico de exclusión, una vez se han descartado otras patologías como la etiología infecciosa, las vasculitis, las enfermedades del tejido conectivo o las neoplasias.

## BIBLIOGRAFIA

Rúa-Figueroa Fernández de Larrinoa I, Calvo Alén J, Cuadrado Lozano MJ, Freire González MM, Martínez-Taboada VM, Muñoz Fernández S, Úcar Angulo, editores. Manual SER de diagnóstico y tratamiento de las enfermedades reumáticas autoinmunes sistémicas, 1.ª ed. Elsevier España, 2014; 83-6.

Ramos Casals M, Sisó Almirall A. Guía Clínica Enfermedades Autoinmunes Sistémicas SEMI–semFYC 2014. <https://www.semfy.com/wp-content/uploads/2016/05/guia-autoinmunes-semi-semfy.pdf>

Losilla Domínguez M y Sobrino López A. Cansancio y debilidad. En: Guía de actuación en Atención Primaria. 4ª Edición. semFYC Ediciones, Barcelona 2011. 41-46.

Alcober Morte L. Pérdida de apetito. En: Guía de actuación en Atención Primaria. 4ª Edición. SemFYC Ediciones, Barcelona 2011. 47-51.

Aguilar Utrilla P y Lorenzo Riera A. Pérdida de peso. En: Guía de actuación en Atención Primaria. 4ª Edición. semFYC Ediciones, Barcelona 2011. 52-56.

Castro Alvirenaa JD, Verdejo Bravo C. Protocolo diagnóstico y tratamiento del síndrome constitucional en los pacientes mayores. Medicine. 2014; 11(62): 3720-4



# ENFERMEDADES AUTOINMUNES SISTÉMICAS

## GUÍA PARA DERIVACIÓN EN ATENCIÓN PRIMARIA

### SER-SEMFYC

## FIEBRE

Dr. Xavier Mas Garriga

Sociedad Española de Medicina Familiar y Comunitaria (SEMFYC)

Especialista en Medicina Familiar y Comunitaria

EAP Santa Eulàlia Sud. L'Hospitalet de Llobregat (Barcelona)

Dra. M<sup>a</sup> Victoria Hernández Miguel

Sociedad Española de Reumatología (SER)

Especialista en Reumatología

Hospital Clínico y Provincial. Barcelona

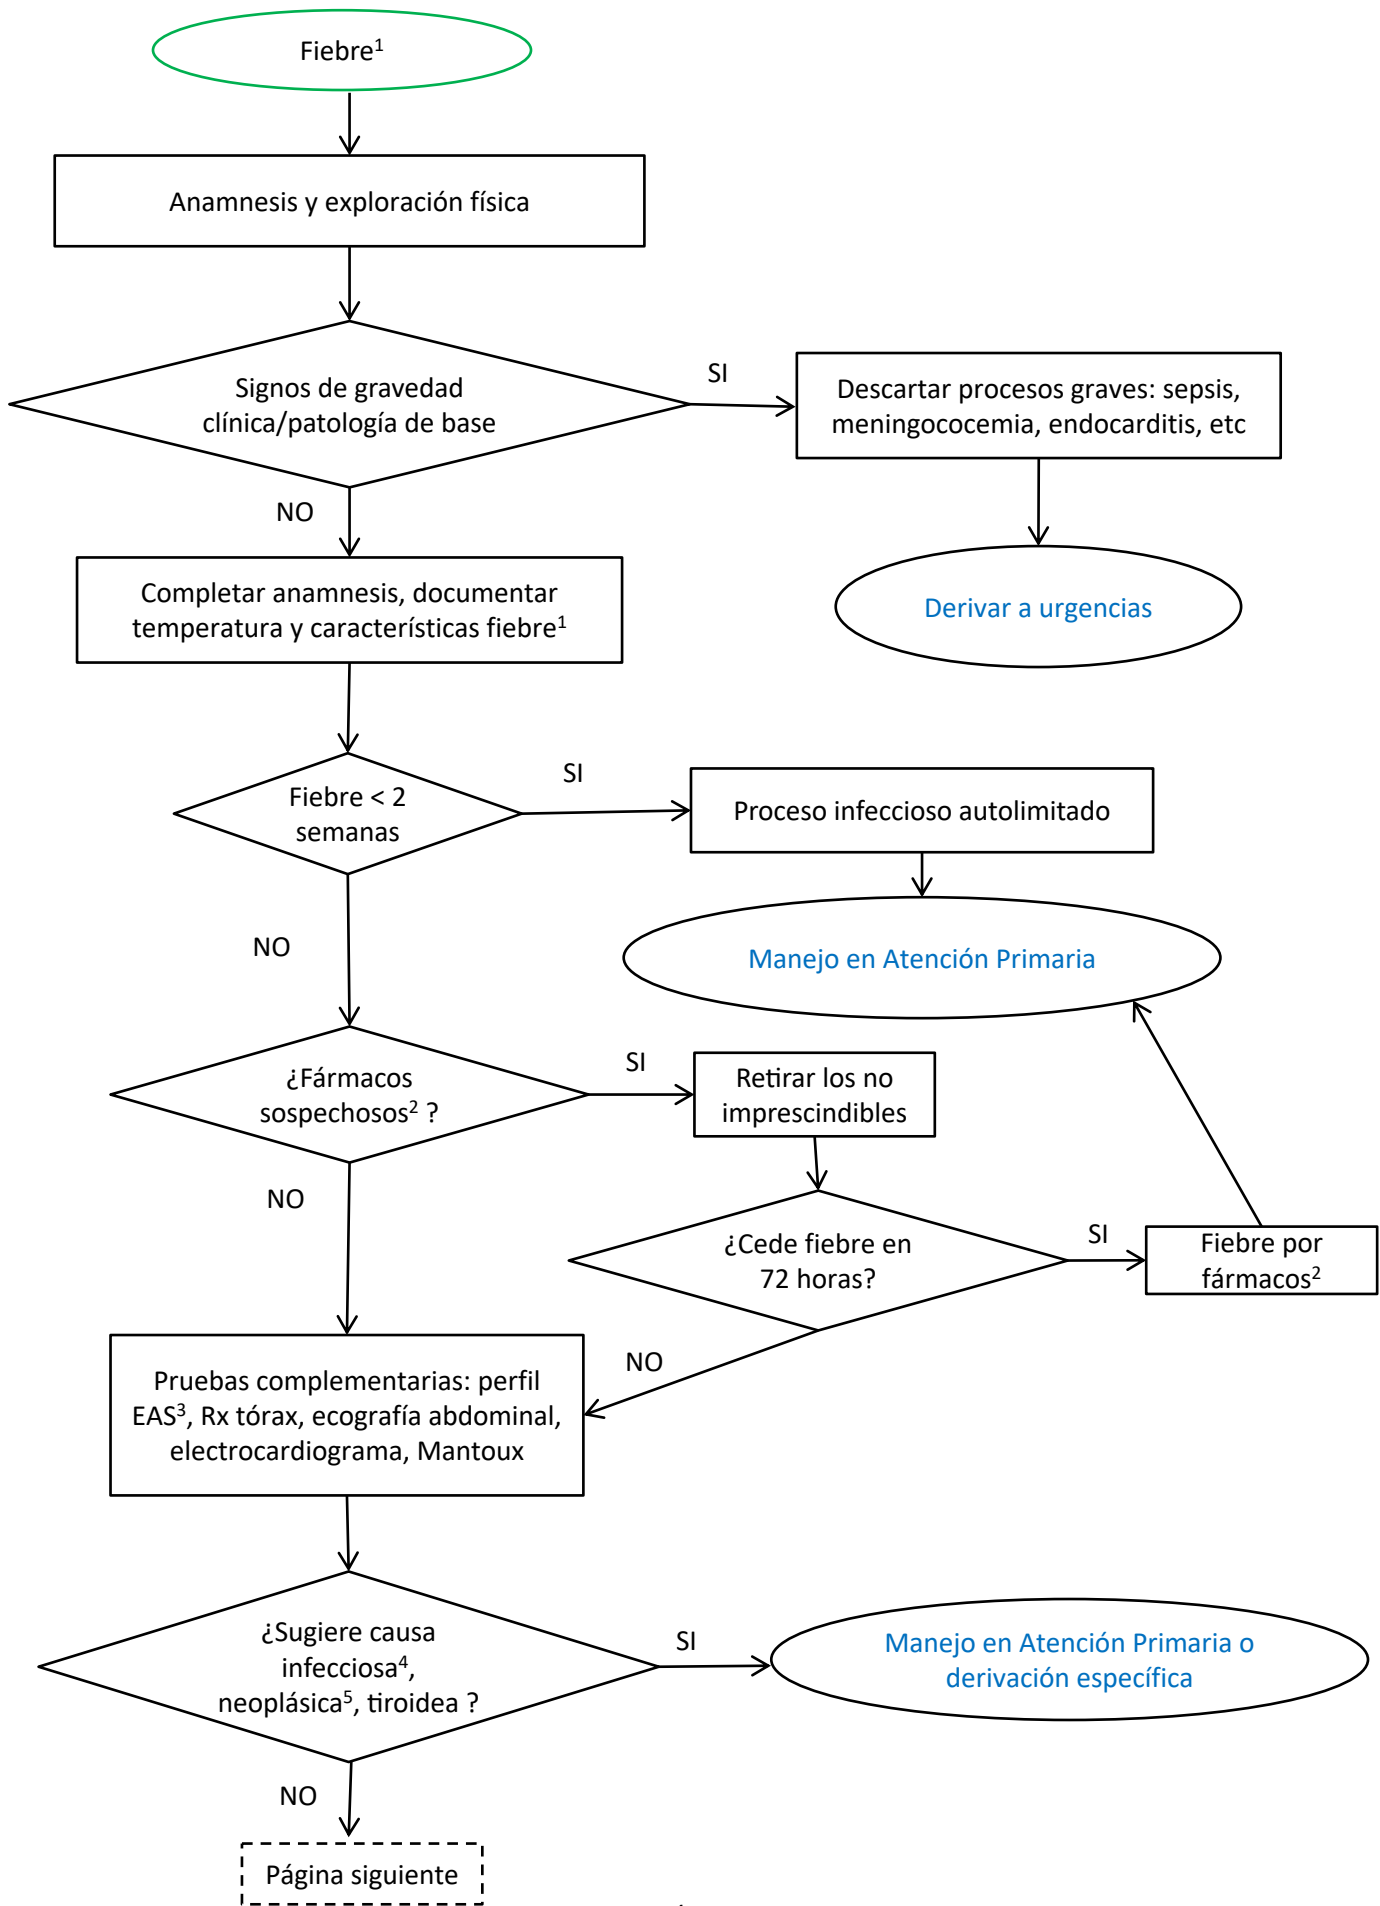

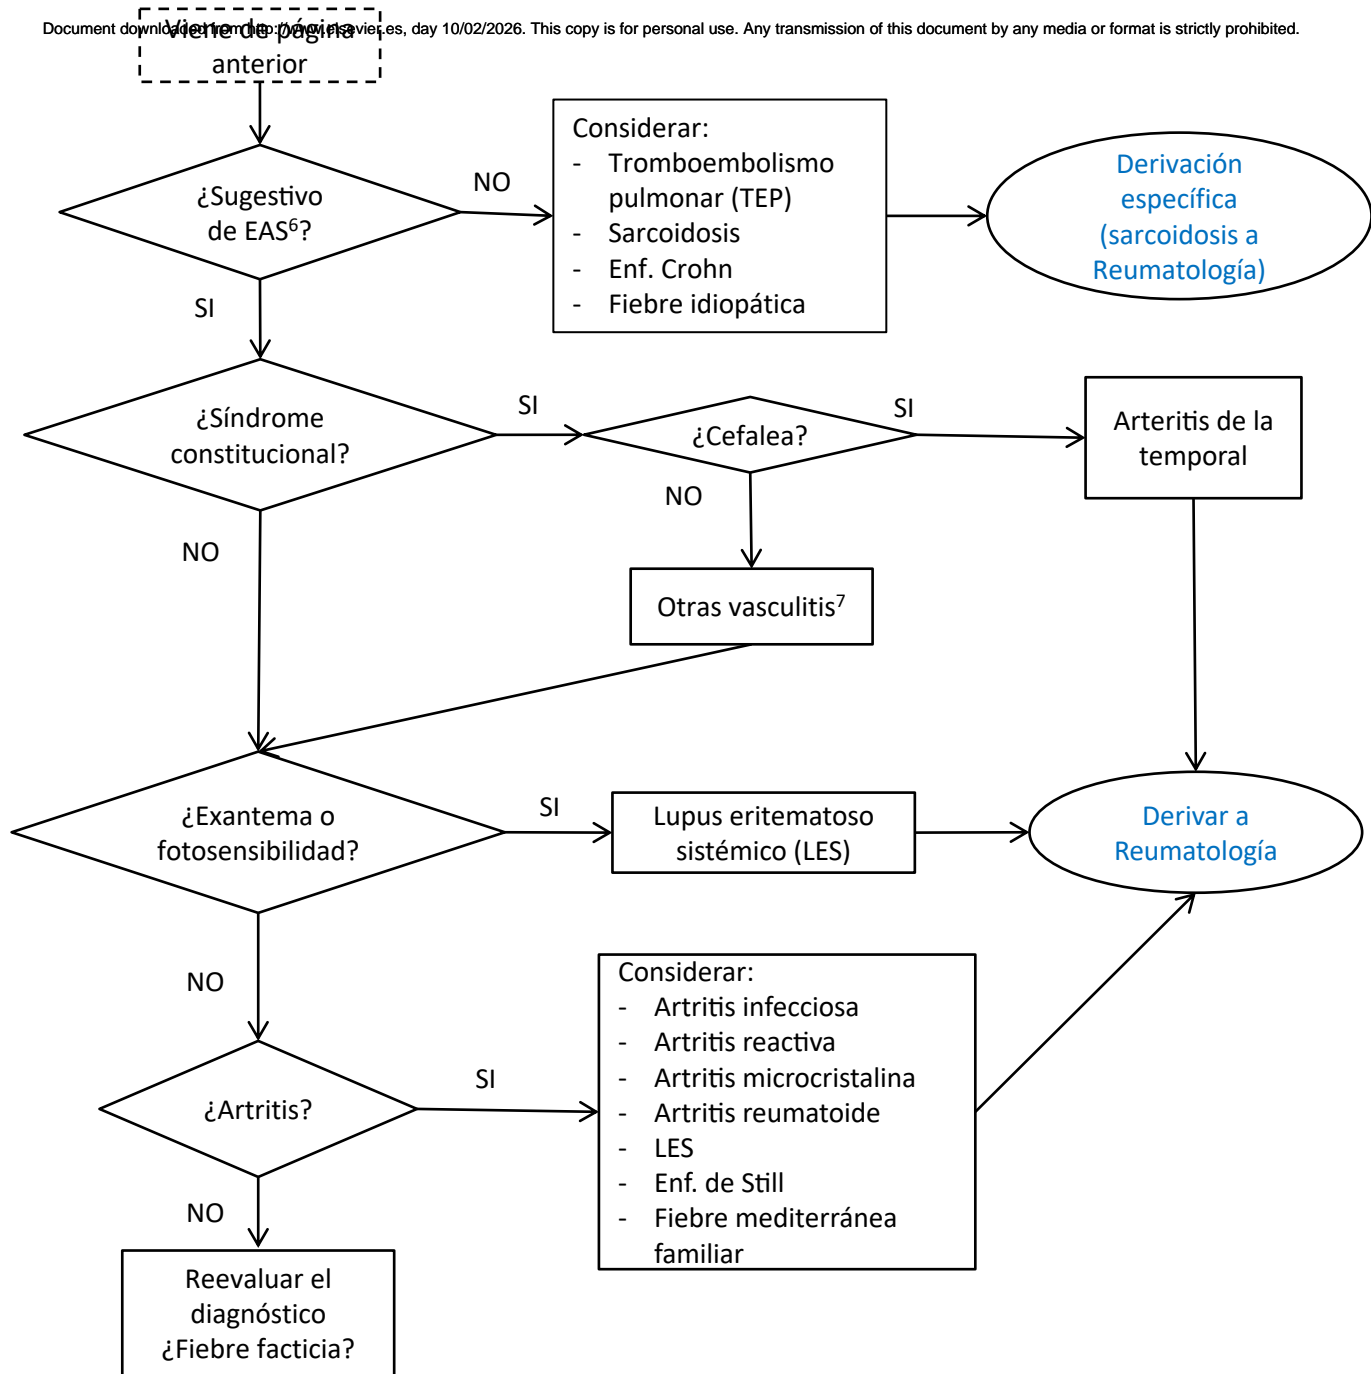

## NOTAS

1. La fiebre en las enfermedades autoinmunes sistémicas (EAS) suele ser bien tolerada, continua (oscilaciones  $<1^{\circ}\text{C}$  diario), intermitente (se alternan días o semanas sin fiebre) o remitente (oscilaciones diarias  $> 1^{\circ}\text{C}$  sin llegar a temperatura normal).
2. Fármacos: antibióticos (penicilinas, cefalosporinas, sulfamidas, furantoina), alopurinol, hidantoínas, interferón, quimioterápicos, quinidina, alfa metildopa. Menos frecuentes: rifampicina, cimetidina, hidralacina, estreptomycin, vancomicina, nifedipino y captopril.
3. Perfil EAS: análisis inicial habitualmente disponible en Atención Primaria para enfermedades autoinmunes, que incluye hemograma, bioquímica básica, velocidad de sedimentación, proteína C reactiva, anticuerpos antinucleares (ANA) y orina elemental. Incluir además función tiroidea, proteinograma, anticuerpos anticitrulinados, complemento, crioglobulinas, serologías, sedimento de orina, urinocultivo, hemocultivo y cultivo de esputo si procede.
4. Son infecciosos el 30-50% de los casos: tuberculosis, mononucleosis infecciosa, citomegalovirus, VHC, VIH, absceso intrabdominal, infección del tracto urinario, endocarditis, osteomielitis.
5. Son tumorales el 15-30% de los casos: leucemia, linfoma, mieloma, carcinoma (renal, colon, hígado), metástasis.
6. Son enfermedades autoinmunes sistémicas (EAS) el 10-15% de los casos: vasculitis (arteritis de la temporal), polimialgia reumática (PMR), artritis reumatoide (AR), lupus eritematoso sistémico (LES), enfermedad de Still del adulto, etc. Lo sospecharemos ante alteraciones analíticas (anemia de patrón crónico o hemolítica, leucopenia/linfopenia, eosinofilia, trombocitosis/trombopenia, FR+, ANA+, anti CCP+, ANCA+, elevación de VSG/PCR, hipergamaglobulinemia policlonal, alteraciones del complemento, alteración función renal y/o hepática) y otras manifestaciones de EAS (aftas, artritis, condritis, cuadro constitucional, eritema nodoso, exantema, mialgias, ojo rojo, pleuritis/pericarditis, Raynaud, xeroftalmía/xerostomía)
7. Otras vasculitis: panarteritis nodosa (PAN), vasculitis leucocitoclástica, granulomatosis con poliangeítis (Wegener)

## BIBLIOGRAFIA

- Regueiro Mira M y Regueiro Mira F. Fiebre. En: Guías para la consulta de Atención Primaria. 3ª Edición. Casitérides S.L y autores. 2008, 336-339. [www.fisterra.com](http://www.fisterra.com)
- Núñez Isabel, MªS. Fiebre sin focalidad aparente. En: Guía de actuación en Atención Primaria. 4ª Edición. semFYC Ediciones, Barcelona 2011. 9-13.
- Ramos Casals M, Sisó Almirall A. Guía Clínica Enfermedades Autoinmunes Sistémicas SEMI—semFYC 2014. <https://www.semfy.com/wp-content/uploads/2016/05/guia-autoinmunes-semi-semfy.com.pdf>
- Freire González MM. Evaluación del paciente con fiebre, lesiones cutáneas y artralgias. En: Rúa-Figueroa Fernández de Larrinoa I, Calvo Alén J, Cuadrado Lozano MJ, Freire González MM, Martínez-Taboada VM, Muñoz Fernández S, Úcar Angulo, editores. Manual SER de diagnóstico y tratamiento de las enfermedades reumáticas autoinmunes sistémicas, 1.ª ed. Elsevier España, 2014; 83-6.

# ENFERMEDADES AUTOINMUNES SISTÉMICAS GUÍA PARA DERIVACIÓN EN ATENCIÓN PRIMARIA SER-SEMFYC

## VELOCIDAD DE SEDIMENTACIÓN GLOBULAR (VSG) Y PROTEINA C REACTIVA (PCR) ELEVADAS

Dra. Tatiana Cobo Ibáñez

Sociedad Española de Reumatología (SER)

Especialista en Reumatología

Hospital Universitario Infanta Sofía. Universidad Europea. Madrid.

Dr. Francisco Vargas Negrín

Sociedad Española de Medicina Familiar y Comunitaria (SEMFYC)

Especialista en Medicina Familiar y Comunitaria

C.S. Dr. Guigou. Tenerife

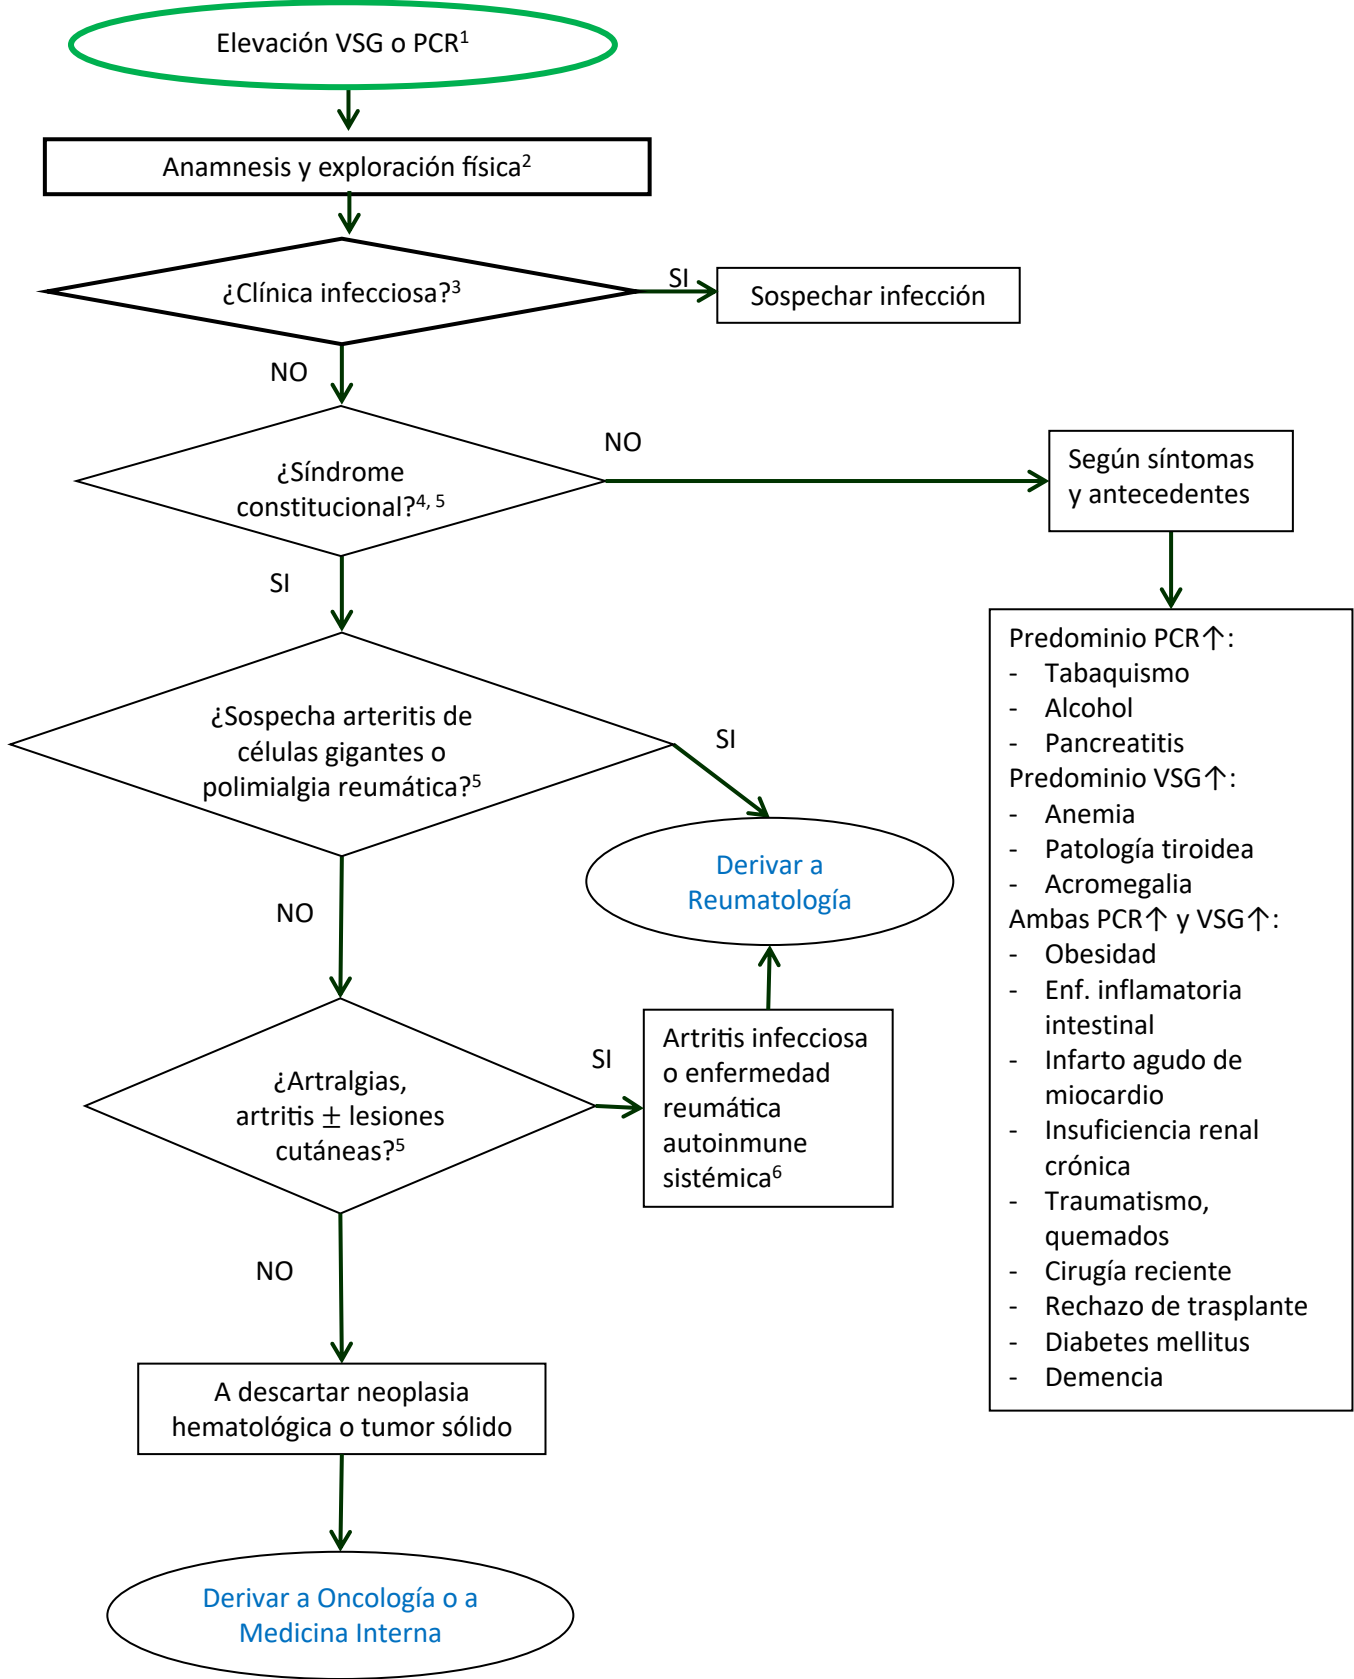

## NOTAS

1. La velocidad de sedimentación globular (VSG) es la velocidad (mm/h) con la que sedimentan los hematíes durante una hora en una columna vertical de sangre anticoagulada, colocada en pipetas de 200 mm de altura y 2,5 mm de diámetro interno, en una superficie plana, sin vibraciones y a temperatura ambiente. Es una medida indirecta de los niveles de reactantes de fase aguda, en especial del fibrinógeno. Puede estar influida por otros constituyentes de la sangre como las inmunoglobulinas, cambios en el tamaño, forma y número de eritrocitos, o factores técnicos. Los valores de VSG aumentan con la edad y son ligeramente más elevados en mujeres. También se incrementan en situaciones fisiológicas como el embarazo, lactancia y menstruación.

Se puede corregir el límite superior del rango de referencia de la VSG en función de la edad y sexo: edad (años)/ 2 para los hombres; edad (años)+ 10 / 2 para las mujeres.

La proteína C reactiva (PCR) es una proteína plasmática que aumenta sus niveles en respuesta a la inflamación, como reactante de fase aguda. No se conoce un nivel de PCR que sea verdaderamente normal o clínicamente inocuo. Los niveles de PCR varían con la edad, el sexo y la raza.

Se puede corregir el límite superior del rango de referencia (mg/dL) en función de la edad y sexo: edad (años) / 50 para los hombres; edad (años) / 50 + 0,6 para mujeres.

Solicitaremos de forma conjunta VSG y PCR: la VSG es menos sensible y menos específica, se eleva más tarde (falso negativo) y se recupera más tarde que la PCR (falso positivo) en el proceso inflamatorio. En caso de discordancia, la elevación de PCR es más sensible para el diagnóstico de enfermedades inflamatorias agudas.

2. No debería utilizarse la VSG y PCR como cribado en personas asintomáticas, sólo ante la sospecha de procesos inflamatorios, infecciosos o neoplásicos. La mayoría de pacientes con VSG mayor de 100 mm/h presentan una enfermedad maligna, infecciosa o una enfermedad autoinmune sistémica (EAS). Niveles de PCR > 50 mg/dl sugieren infección.
3. Descartar infección respiratoria alta o baja, ORL, digestiva, urinaria, oftalmológica o urinaria.
4. No hemos utilizado en este algoritmo la fiebre o febrícula como síntoma guía puesto que no ayuda al diagnóstico diferencial; ya que las infecciones, enfermedades autoinmunes sistémicas, artritis infecciosas y tumores pueden presentarla.
5. Ver algoritmos específicos.
6. El lupus eritematoso sistémico, la dermatomiositis, el síndrome de Sjögren y la esclerosis sistémica cuando están activos pueden cursar con VSG elevada y PCR normal.

## BIBLIOGRAFÍA

Méndez M, Muñoz-Rivas N. Proteína C reactiva, elevación de. En: Rodríguez García JL, editor. Medicina Interna 3, diagnóstico y tratamiento médico (DTM). Alteraciones analíticas. Signos y patrones radiológicos. Madrid: Marbán; 2015. p. 1953-5.

Martín-Quirós A, Robles-Marhuenda A, García-García J, Segura T, Arévalo-Serrano J, Canora J, et al. Velocidad de sedimentación globular (VSG) y otros biomarcadores inflamatorios. En: Rodríguez García JL, editor. Medicina Interna 3, diagnóstico y tratamiento médico (DTM). Alteraciones analíticas. Signos y patrones radiológicos. Madrid: Marbán; 2015. p. 2046-53.

Buitrago Ramírez F, Pagador Trigo A, Gato Núñez C. Cuándo solicitar la velocidad de sedimentación globular y cómo interpretarla cuando está elevada. FMC. 2015; 22 (2): 85-9.

ENFERMEDADES AUTOINMUNES SISTÉMICAS  
GUÍA PARA DERIVACIÓN EN ATENCIÓN PRIMARIA  
SER-SEMFYC

ANTICUERPOS ANTINUCLEARES  
(ANA) ELEVADOS

Dr. Íñigo Rúa-Figueroa Fernández de Larrinoa

Sociedad Española de Reumatología (SER)

Especialista en Reumatología

Hospital Universitario Doctor Negrín. Las Palmas de Gran Canaria.

Dr. Francisco Vargas Negrín

Sociedad Española de Medicina Familiar y Comunitaria (SEMFYC)

Especialista en Medicina Familiar y Comunitaria

C.S. Dr. Guigou. Tenerife



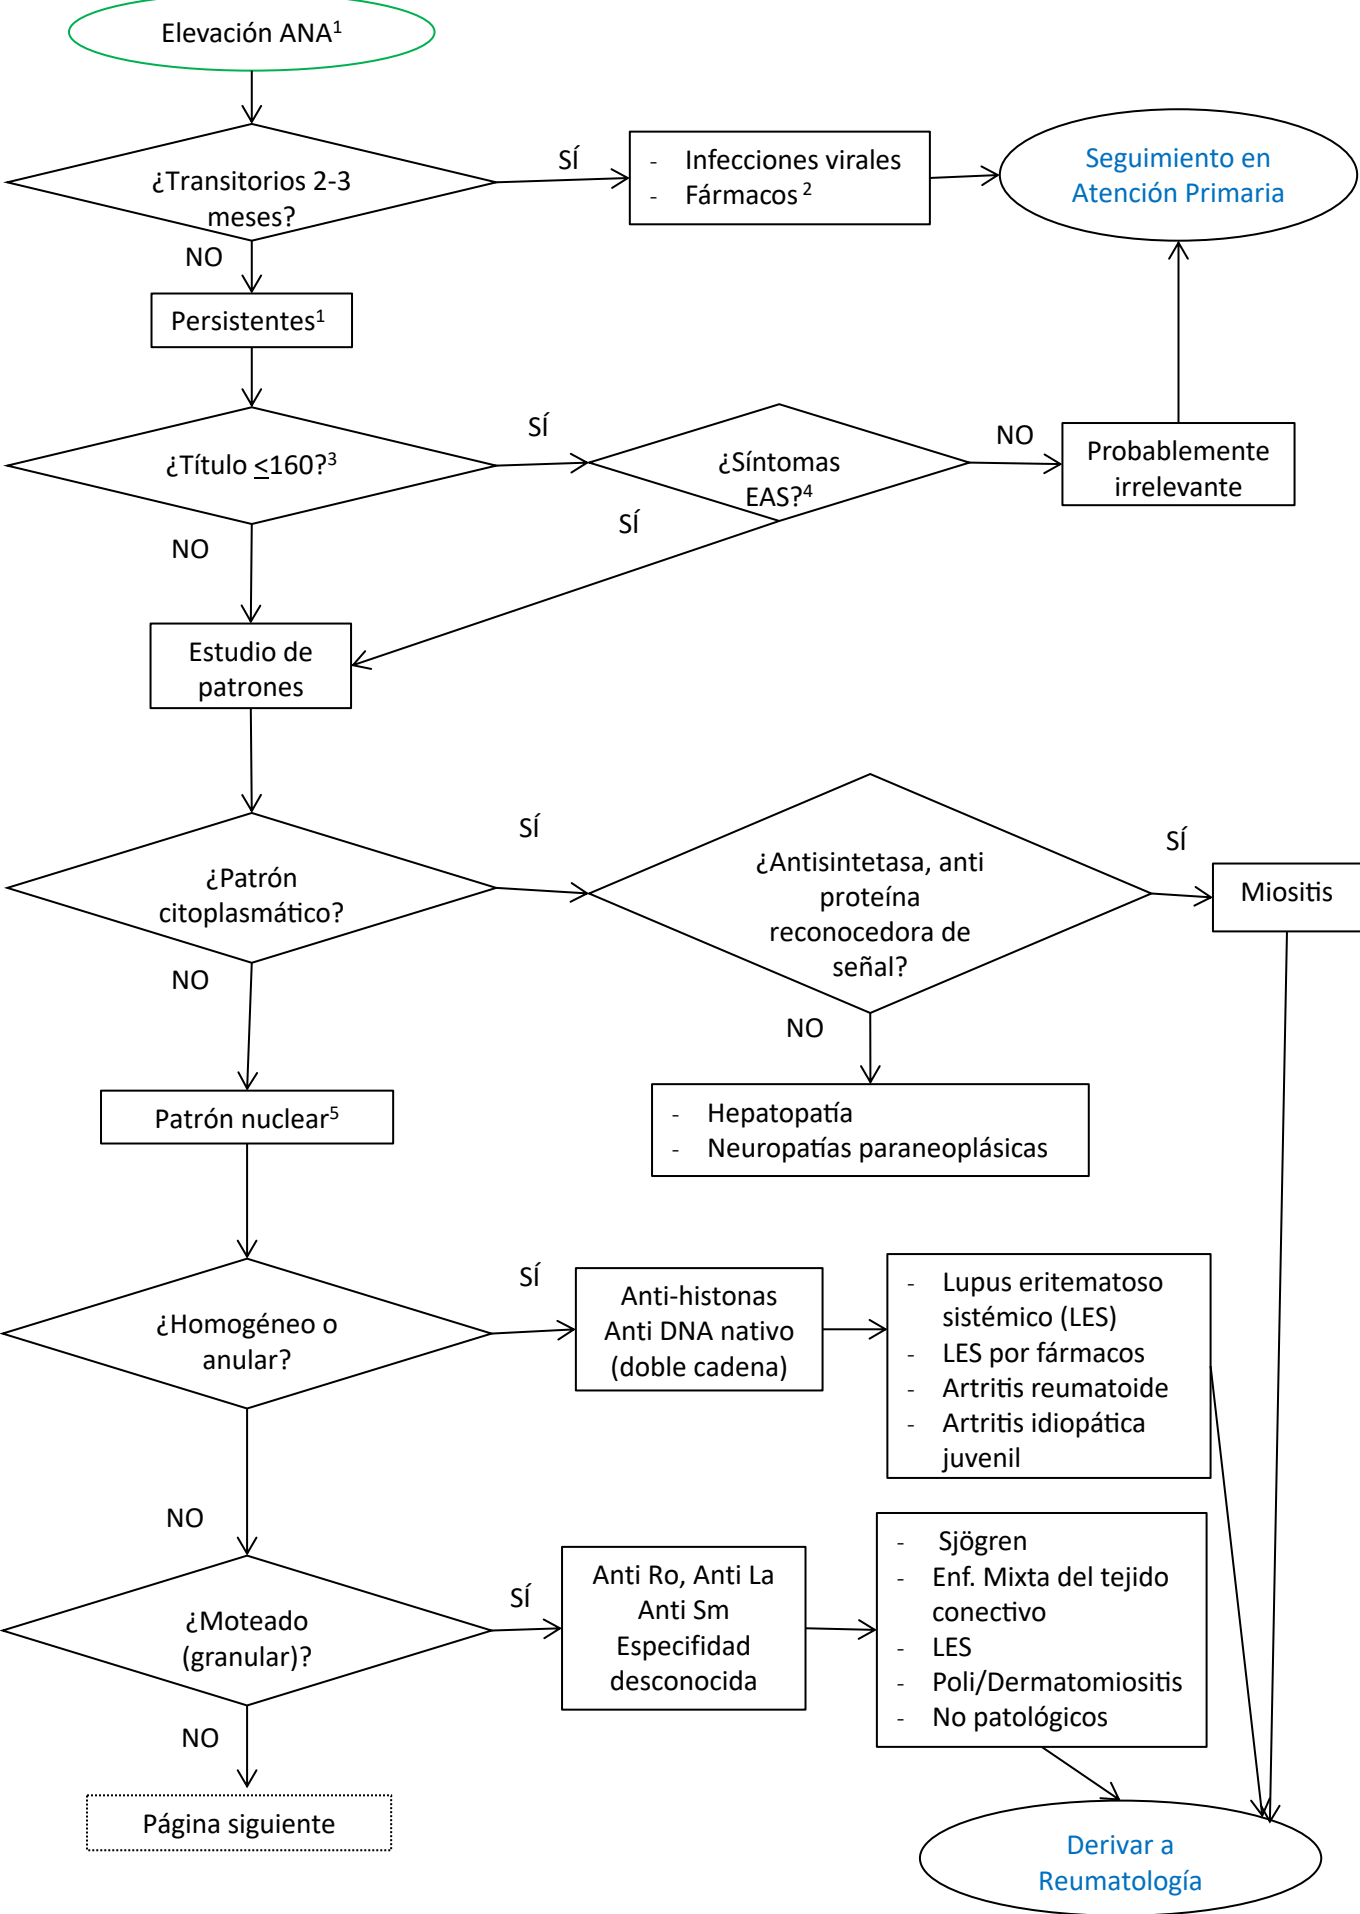

Viene de página anterior

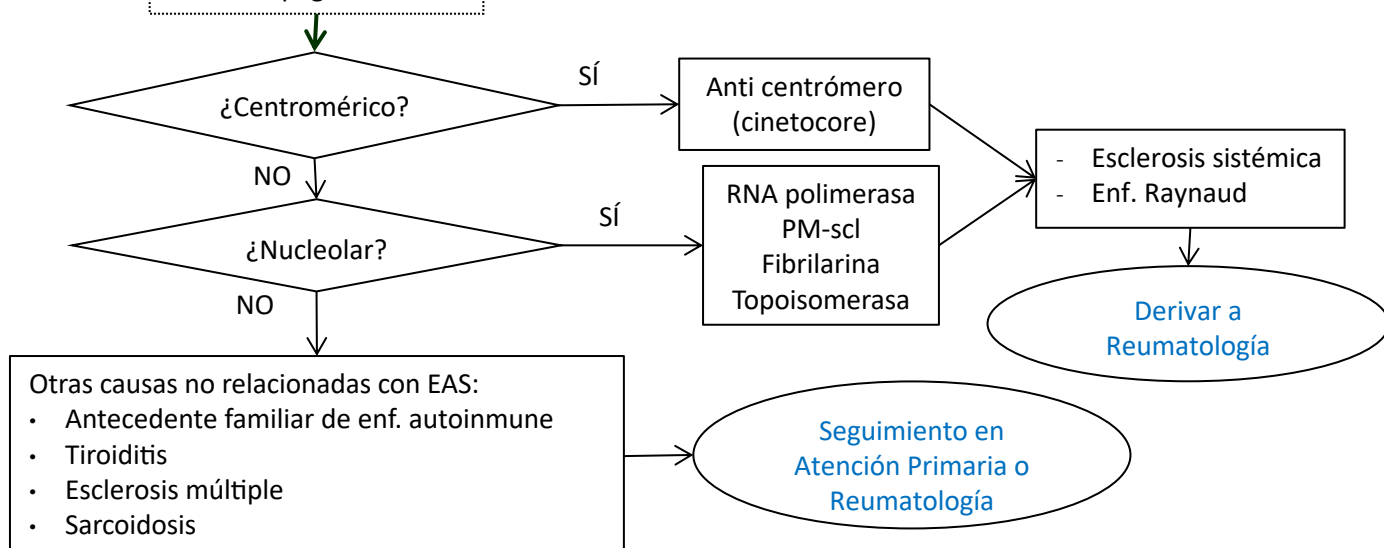

## NOTAS

1. Los anticuerpos antinucleares (ANA) constituyen un test poco específico de enfermedad reumática sistémica e incluso de enfermedad autoinmune, pudiendo aparecer también durante ciertas infecciones, determinadas neoplasias e incluso en sujetos sanos. Los sujetos normales, particularmente mujeres, ancianos y familiares de pacientes con conectivopatías, producen ANA hasta en un 30% de los casos, dependiendo de la técnica y el punto de corte utilizados, usualmente a título no elevado. Para títulos  $\geq 1/160$ , la positividad en población sana se calcula en torno al 5%. La mayoría de las enfermedades reumáticas sistémicas cursan con ANA positivos, así como lo hacen ciertas enfermedades autoinmunes órgano-específicas no reumáticas como la hepatitis autoinmune, la tiroiditis de Hashimoto, la esclerosis múltiple etc.
2. Múltiples fármacos pueden causar una positividad falsa a los ANA, como la hidralazina, isoniácida o procainamida
3. Títulos mantenidamente elevados ( $\geq 160$ ) de ANA también se pueden encontrar en enfermedades órgano específicas por autoanticuerpos, como tiroiditis de Hashimoto o hepatitis autoinmune
4. Raynaud, síndrome *sicca* (Sjögren), artralgias inflamatorias o tumefacción poliarticular, debilidad proximal, lesiones cutáneas, fotosensibilidad, aftas orales, alopecia y esclerosis cutánea
5. Los patrones de inmunofluorescencia (IFI) tienen un valor limitado a la hora de predecir especificidades antigénicas de los ANA, debiendo ser empleados solo a título orientativo. La búsqueda de las especificidades antigénicas debe ser también guiada por la sospecha clínica
6. Fármacos asociados con la inducción de LES (definitiva): procainamida, isoniácida, quinidina, minociclina, penicilamida, antiTNF alfa, interferón alfa, hidralazina, metildopa, diltiazem.

## BIBLIOGRAFÍA

López-Longo FJ. Significado clínico de los autoanticuerpos en las enfermedades reumáticas sistémicas. En: Manual SER de diagnóstico y tratamiento de las enfermedades reumáticas autoinmunes sistémicas. Ed. Elsevier, Barcelona 2014: 9-15

Solomon DH, Kavanaugh AJ, Schur PH; American College of Rheumatology Ad Hoc Committee on Immunologic Testing Guidelines. Evidence-based guidelines for the use of immunologic tests: antinuclear antibody testing. *Arthritis Rheum.* 2002;47(4):434-44.

Cabiedes J, Núñez-Álvarez CA. Anticuerpos antinucleares. *Reumatol Clin.* 2010;6(4):224-230.

# ENFERMEDADES AUTOINMUNES SISTÉMICAS GUÍA PARA DERIVACIÓN EN ATENCIÓN PRIMARIA SER-SEMFYC

## CREATINFOSFOKINASA (CPK) ELEVADA

Dra. Tatiana Cobo Ibáñez

Sociedad Española de Reumatología (SER)

Especialista en Reumatología

Hospital Universitario Infanta Sofía. Universidad Europea. Madrid.

Dr. Francisco Vargas Negrín

Sociedad Española de Medicina Familiar y Comunitaria (SEMFYC)

Especialista en Medicina Familiar y Comunitaria

Centro de Salud Dr. Guigou. Tenerife

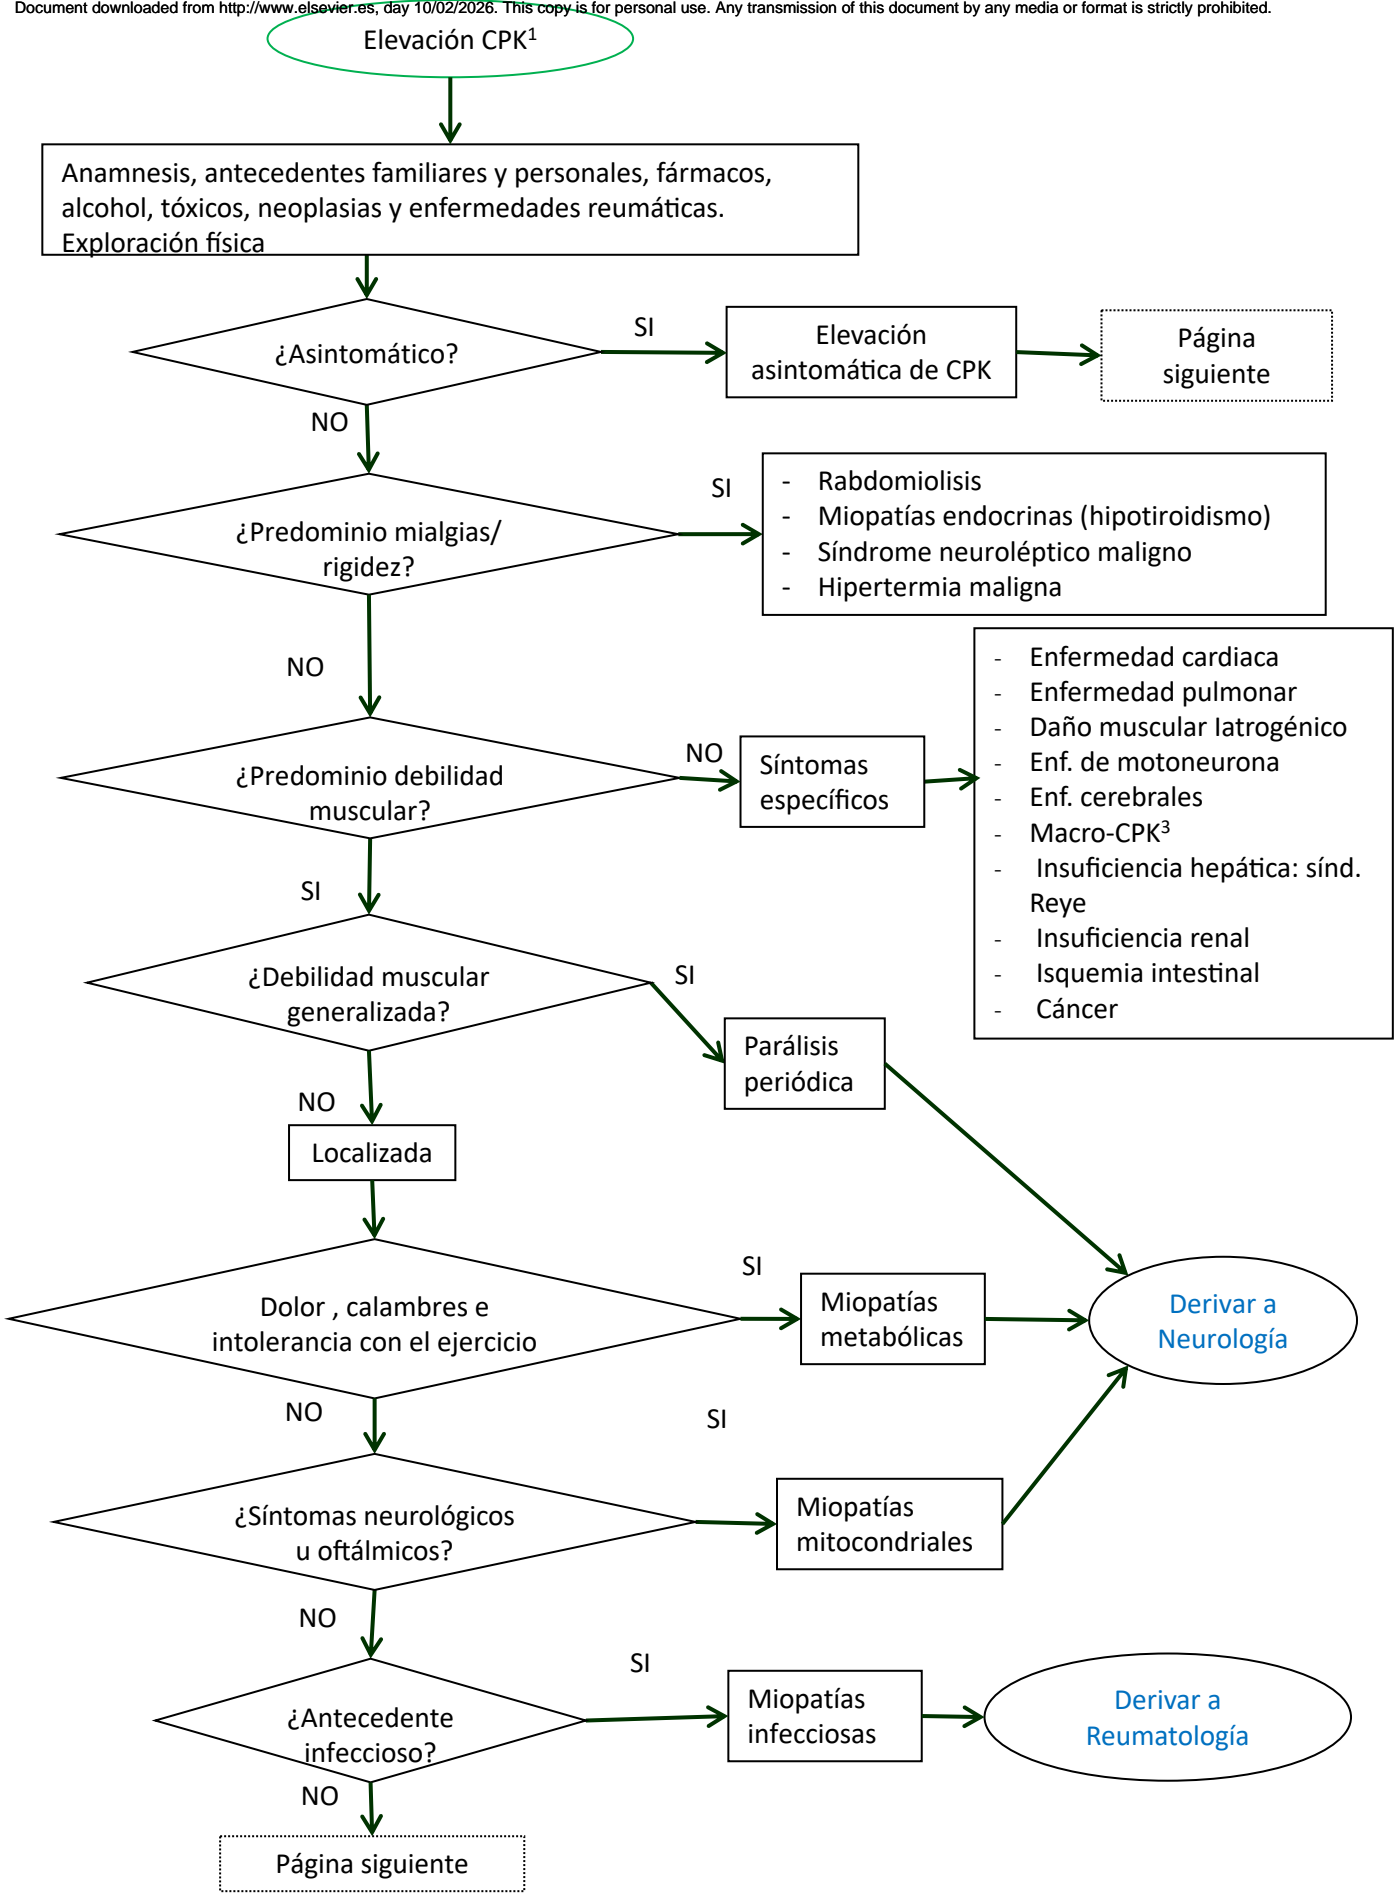

Viene de página anterior

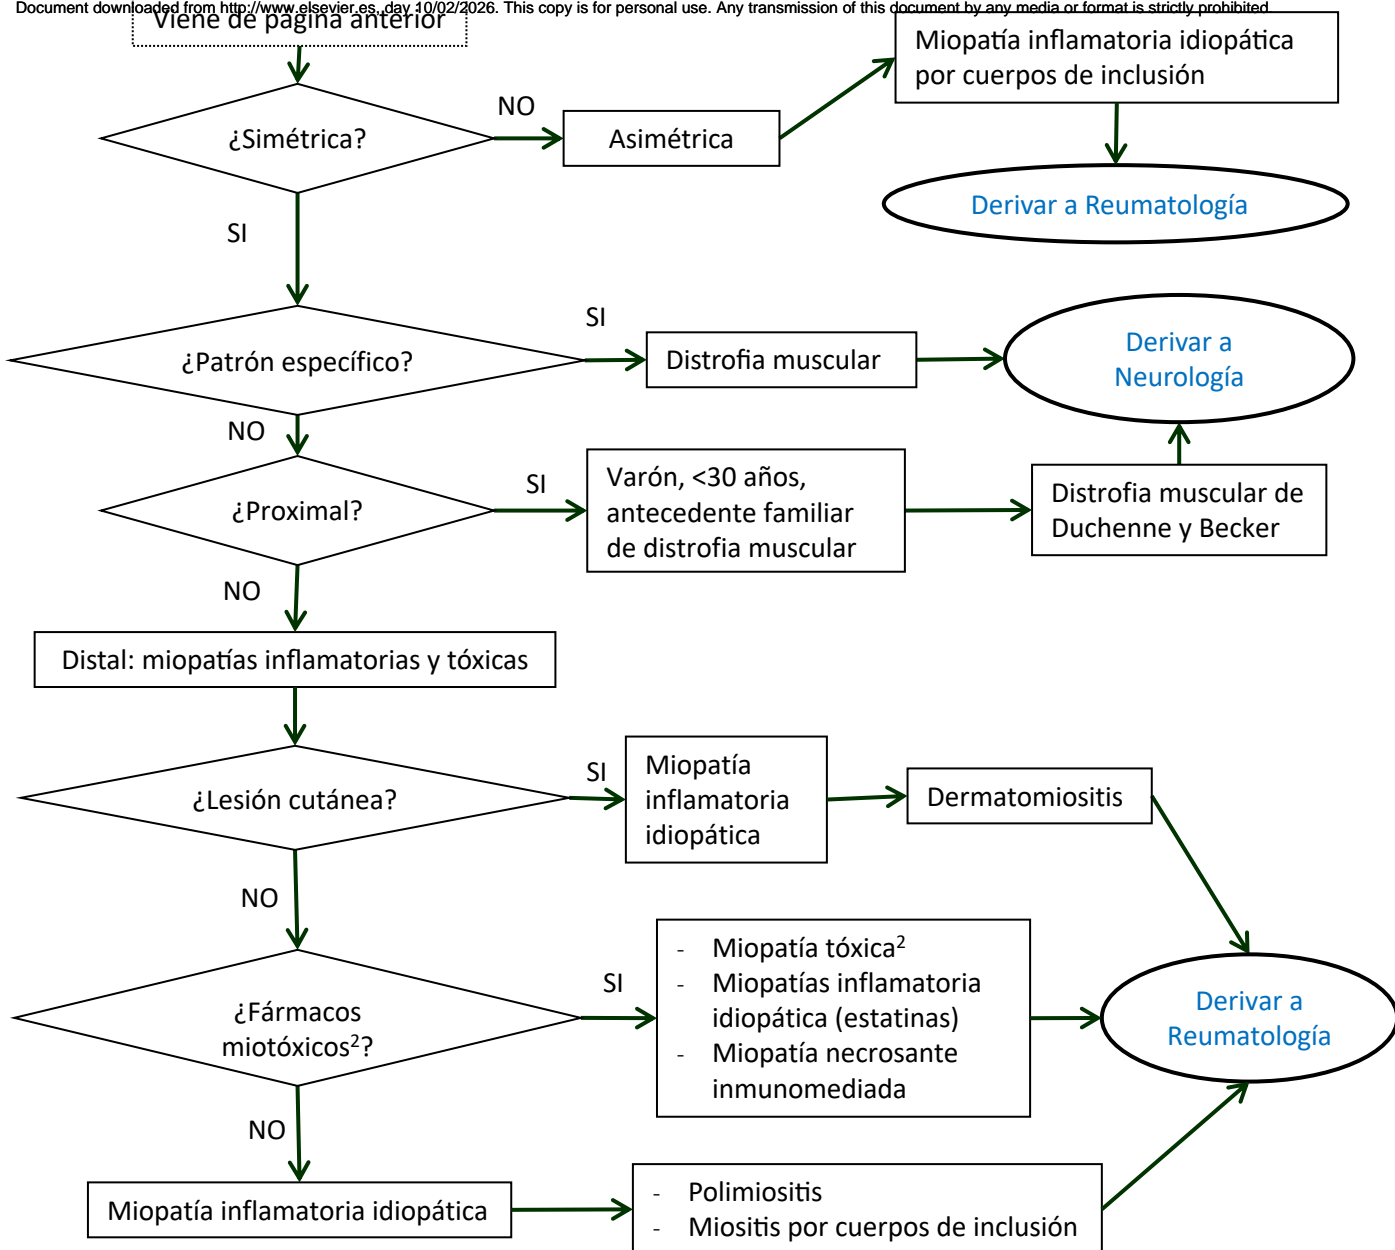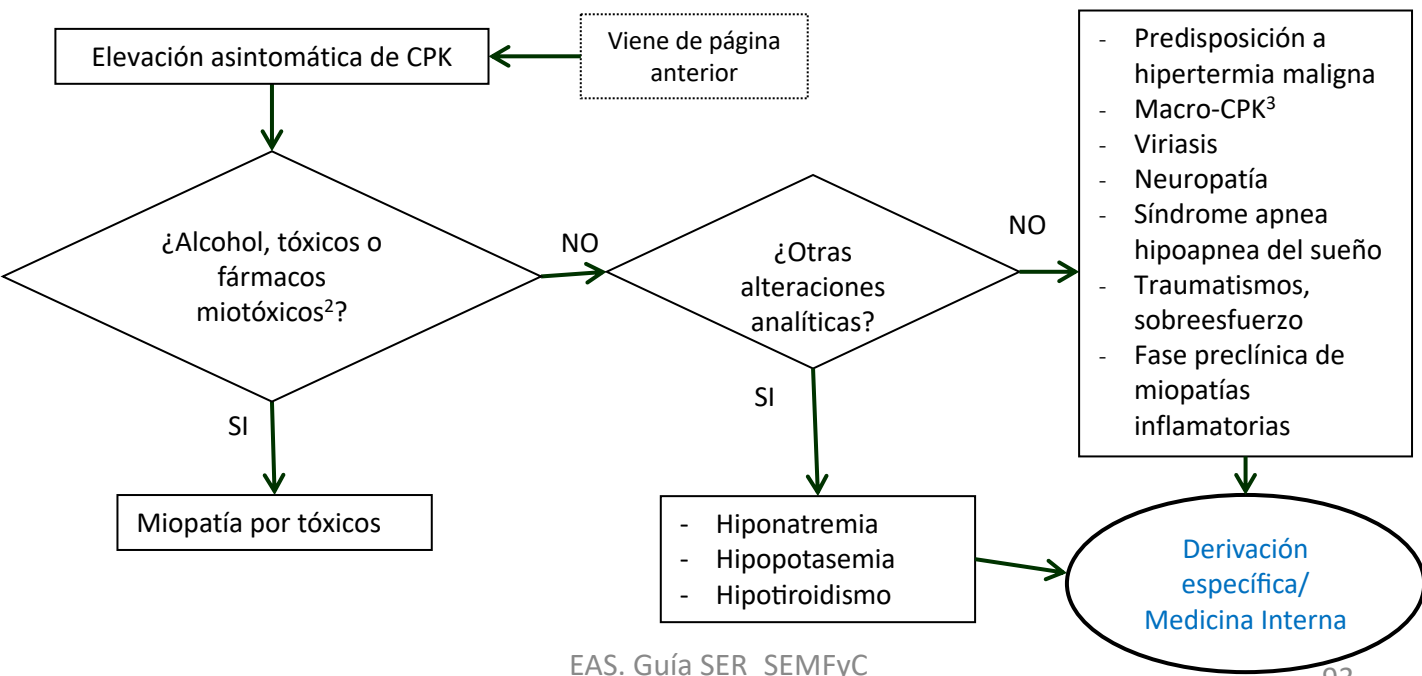

## NOTAS

1. La creatinfosfokinasa (CPK) o creatinkinasa es un enzima citoplasmática presente en las células musculares, responsable de la transferencia de fosfatos para la producción de energía. Sus cifras varían según el laboratorio, género, etnia, masa muscular y actividad física.
2. Son fármacos miotóxicos: estatinas, fibratos, ezetimiba, antimaláricos, colchicina, antidopaminérgicos, B-bloqueantes, isotretinoína, antirretrovirales, benzodiazepinas, citostáticos, algunos anestésicos(halotano), furosemida, anticoagulantes, anfotericina B y ampicilina. Los corticoides pueden ser fármacos miotóxicos que inducen debilidad muscular.
3. Las macro-CPK ( macroquinasas) son complejos de CPK e inmunoglobulinas de elevado peso molecular detectados por electroforesis en personas habitualmente asintomáticas. En algunos casos se asocian a neoplasia, enfermedad cardiovascular, cirrosis, colitis ulcerosa y otros procesos inflamatorios crónicos.

## BIBLIOGRAFÍA

Gutiérrez Gutiérrez G. Debilidad muscular en: Rúa-Figueroa Fernández de Larrinoa I, Calvo Alén J, Cuadrado Lozano MJ, Freire González MM, Martínez-Taboada VM, Muñoz Fernández S, Úcar Angulo, editores. Manual SER de diagnóstico y tratamiento de las enfermedades reumáticas autoinmunes sistémicas, 1.ª ed. Barcelona: Elsevier; 2014. p. 83-6.

Cobo T, Robles-Marhuenda A, Ortego N, Rodríguez García JL. Creatinfosfoquinasa, elevación de. En: Rodríguez García JL, editor. Medicina Interna 3, diagnóstico y tratamiento médico (DTM). Alteraciones analíticas. Signos y patrones radiológicos. Madrid: Marbán; 2015. p. 1678-90.

Cobo Ibáñez T, Alonso Esteban R. El paciente con enfermedad muscular inflamatoria. Lo que el médico de Atención Primaria debe conocer de la polimiositis y dermatomiositis. En: Ubach Badía B, Muñoz Fernández S, editores. Enfermedades reumáticas autoinmunes sistémicas (ERAS) para médicos de Atención Primaria. Madrid: YOU& US; 2015. p. 71-9.

# ENFERMEDADES AUTOINMUNES SISTÉMICAS GUÍA PARA DERIVACIÓN EN ATENCIÓN PRIMARIA SER-SEMFYC

## FACTOR REUMATOIDE (FR)

Dr. Francisco Vargas Negrín

Sociedad Española de Medicina Familiar y Comunitaria (SEMFYC)

Especialista en Medicina Familiar y Comunitaria

Centro de Salud Dr. Guigou. Tenerife

Dra. Tatiana Cobo Ibáñez

Sociedad Española de Reumatología (SER)

Especialista en Reumatología

Hospital Universitario Infanta Sofía. Universidad Europea. Madrid.

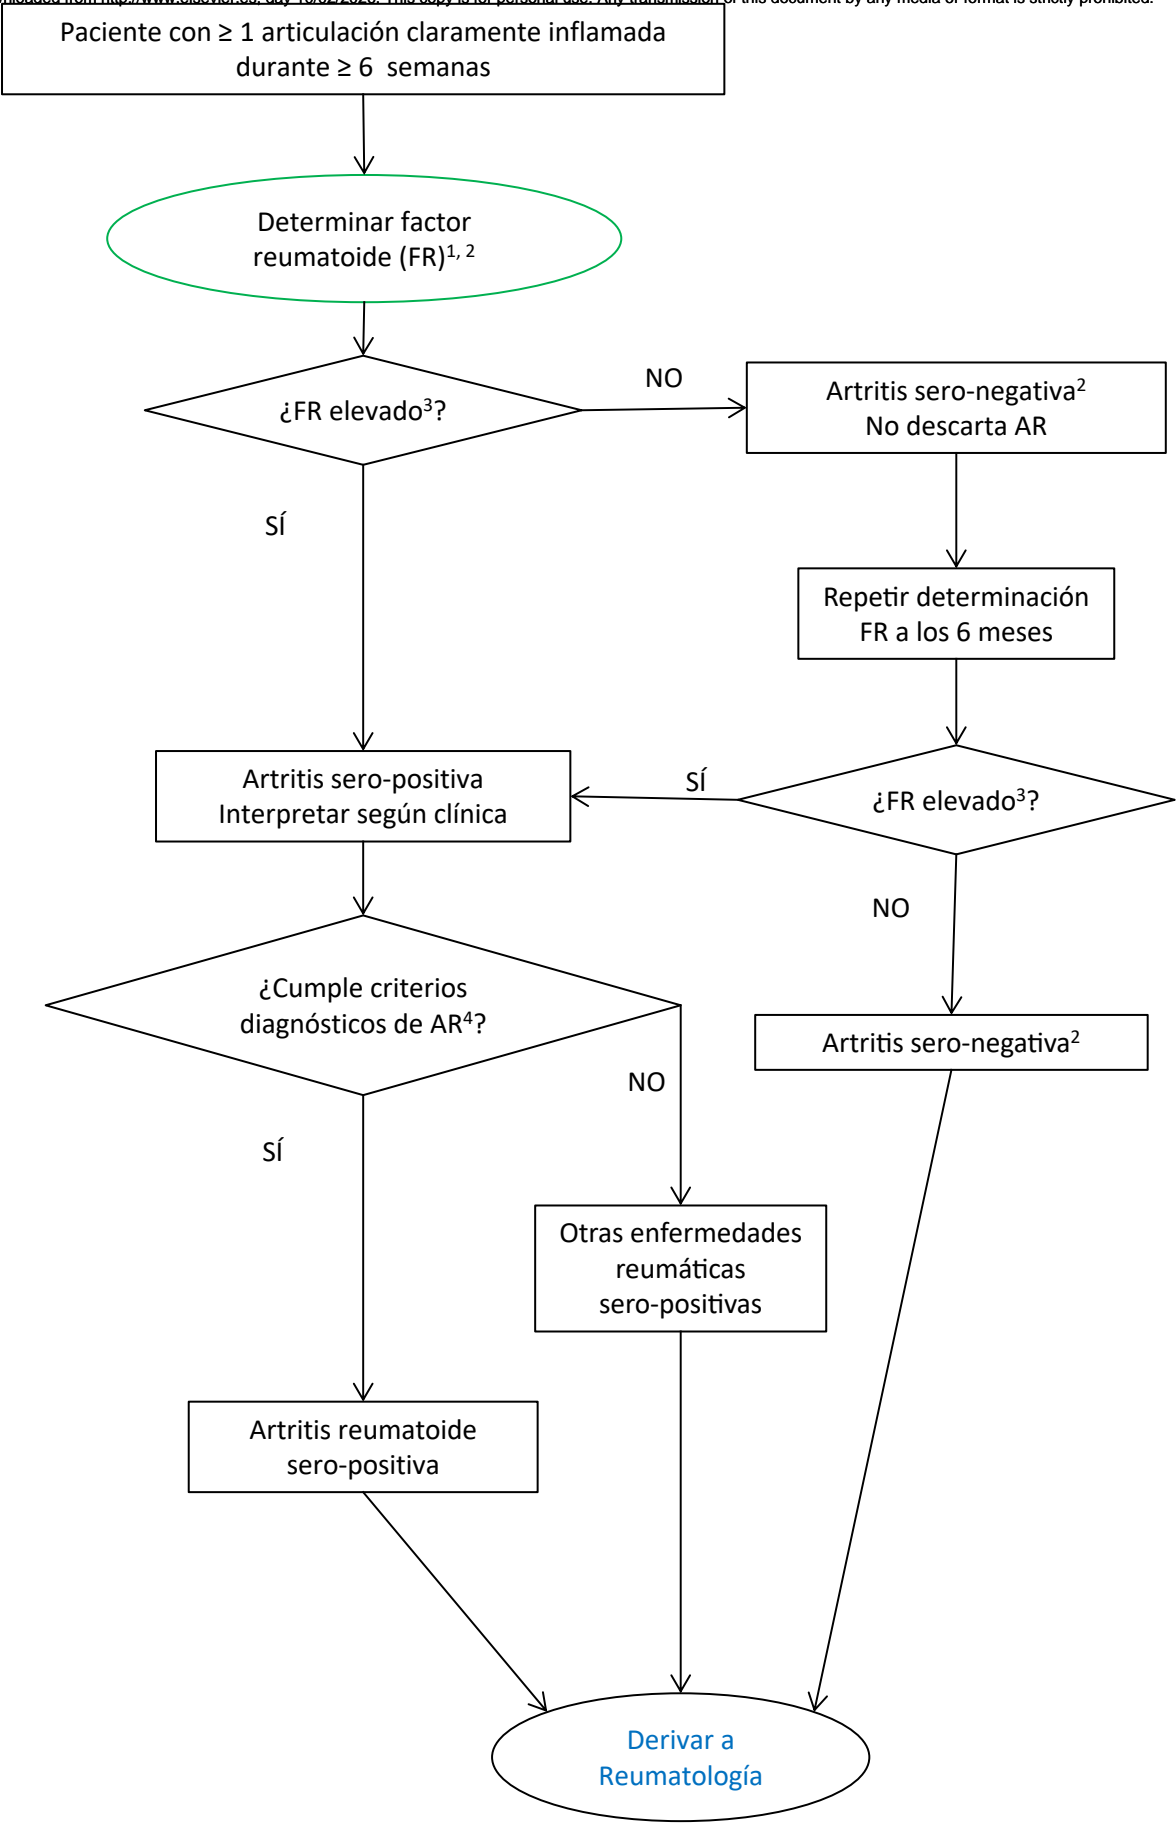



## NOTAS

1. El factor reumatoide (FR) lo constituyen inmunoglobulinas tipo IgM (lo más frecuente), IgG, IgA o IgE dirigidas contra epitopos situados en la fracción constante (Fc) de la inmunoglobulina G.
2. El FR es un criterio diagnóstico de la artritis reumatoide (AR) de la ACR/EULAR, sin ser patognomónico de la enfermedad. Solo el 30% de las personas seropositivas para FR presentan AR, mientras que el 20-30% de los pacientes con AR son seronegativos. Está presente en el 5% de población sana menor de 60 años, aumentando el porcentaje con la edad hasta el 5–10 % en mayores de 60 años. Se elevan en otras enfermedades reumáticas, infecciones virales, enfermedades inflamatorias agudas y crónicas o enfermedades linfoproliferativas (leucemia linfocítica crónica, macroglobulinemia de Waldenström, crioglobulinemia mixta), con frecuencia variable:
  - Artritis reumatoide 60-75%
  - Síndrome Sjögren 75-95
  - Enfermedad mixta del tejido conectivo 50–60%
  - Artritis reumatoide juvenil 10%
  - Lupus eritematoso sistémico 15-30%
  - Crioglobulinemias 40-100%
  - Esclerodermia 20%
  - Dermatomiositis y Polimiositis 20%
  - Enfermedad de Waldeström 25%
  - Tuberculosis 18%
  - Cirrosis 40%
  - Sarcoidosis 10%
  - Endocarditis bacteriana subaguda 50%
3. La detección de FR puede hacerse por diferentes técnicas: aglutinación de partículas de látex (positivo > 1:80), nefelometría (positivo >40-60 U/mL), ELISA (positivo > 15 U/mL). El valor predictivo positivo (VPP) es bajo en población asintomática, sin embargo el valor predictivo negativo (VPN) en población general es del 89% para AR y del 85% para cualquier enfermedad autoinmune. En sujetos con clínica (rigidez matutina, artralgias, poliartritis simétrica con afectación de pequeñas articulaciones, xerostomía, xeroftalmia, síndrome del túnel del carpo) el VPP es el 70–80% y el VPN >95%. Es una herramienta aceptable para descartar patología reumática en la práctica clínica. La presencia de FR a títulos altos se asocia con manifestaciones extraarticulares y peor curso evolutivo de la AR.
4. Criterios de clasificación de artritis reumatoide “definida” ACR/EULAR 2010:
  - Presencia confirmada de sinovitis en al menos 1 articulación, sin un diagnóstico alternativo que explique mejor la sinovitis
  - Al menos una puntuación total de 6 (máximo 10) en 4 dominios:
    - Número y localización de las articulaciones involucradas (0-5)
    - Anomalía serológica: FR ± Anticuerpos antipéptidos citrulinados (0-3)
    - Respuesta de fase aguda elevada, VSG ± PCR (0-1)
    - Duración de los síntomas menor o mayor a 6 semanas (0-1).

## BIBLIOGRAFÍA

Tighe H, Carson D. Factor reumatoide. En: Harris DE (Ed). Kelley Tratado de Reumatología. 7ª Edición. Elsevier España, 2006: 305–314.

Aletaha D, Neogi T, Silman AJ, Funovits J, Felson DT, Bingham CO 3rd, et al. 2010 Rheumatoid arthritis classification criteria: an American College of Rheumatology/European League Against Rheumatism collaborative initiative. *Arthritis Rheum.* 2010 Sep;62(9):2569-81.

## GLOSARIO DE ABREVIATURAS

|                                                                                                            |                                                              |
|------------------------------------------------------------------------------------------------------------|--------------------------------------------------------------|
| AAF: Anticuerpos anti fosfolípido                                                                          | SEMFYC: Sociedad Española de Medicina Familiar y Comunitaria |
| Ac: Anticuerpos                                                                                            | SER: Sociedad Española de Reumatología                       |
| ACG: Arteritis de células gigantes                                                                         | SIDA: Síndrome de inmunodeficiencia adquirida                |
| AFP: Alfa fetoproteína                                                                                     | Sínd: Síndrome                                               |
| AL: Anticuerpo lúpico                                                                                      | TC: Tomografía computarizada                                 |
| ANA: Anticuerpos antinucleares                                                                             | TEP: Tromboembolismo pulmonar                                |
| ANCA: Anticuerpos anticardiolipina                                                                         | TNF: Factor de necrosis tumoral                              |
| AntiCCP: Anticuerpos anti péptido citrulinado                                                              | TTPA: Tiempo de tromboplastina activada                      |
| AR: Artritis reumatoide                                                                                    | TVP: Trombosis venosa profunda                               |
| Ca: Cáncer                                                                                                 | VHB: Virus de la hepatitis B                                 |
| CEA: Antígeno carcinoembrionario                                                                           | VHC: Virus de la hepatitis C                                 |
| CMV: Citomegalovirus                                                                                       | VIH: Virus de la inmunodeficiencia humana                    |
| CPAP: Presión positiva continua para vía aérea                                                             | VSG: Velocidad de sedimentación globular                     |
| CPK: Creatinfosfokinasa                                                                                    |                                                              |
| EAS: Enfermedad autoinmune sistémica                                                                       |                                                              |
| ELISA: Enzimoinmunoanálisis                                                                                |                                                              |
| Enf: Enfermedad                                                                                            |                                                              |
| EORA: Artritis reumatoide de inicio en la edad tardía                                                      |                                                              |
| ES: Esclerosis sistémica                                                                                   |                                                              |
| FM: Fibromialgia                                                                                           |                                                              |
| FR: Factor reumatoide/ Fenómeno de Raynaud                                                                 |                                                              |
| GEP: Granulomatosis eosinofílica con poliangitis                                                           |                                                              |
| GP: Granulomatosis con poliangitis                                                                         |                                                              |
| LES: Lupus eritematoso sistémico                                                                           |                                                              |
| MMII: Miembros inferiores                                                                                  |                                                              |
| MMSS: Miembros superiores                                                                                  |                                                              |
| ORL: Otorrinolaringólogo                                                                                   |                                                              |
| PAN: Panarteritis nodosa                                                                                   |                                                              |
| PCR: Proteína C reactiva                                                                                   |                                                              |
| PMR: Polimialgia reumática                                                                                 |                                                              |
| POEMS: Polineuropatía, organomegalia, endocrinopatía, banda monoclonal y lesiones cutáneas ( <i>skin</i> ) |                                                              |
| PSA: Antígeno prostático específico                                                                        |                                                              |
| PFAPA: fiebre periódica, estomatitis aftosa, faringitis y adenopatías cervicales                           |                                                              |
| RM: Resonancia magnética                                                                                   |                                                              |
| Rx: Radiografía                                                                                            |                                                              |
